# Supplementary material
Source: ML conference proceedings conference paper supplement (https://aclanthology.org/2025.loreslm-1.5)
Supplement: OptionalSupplementaryMaterial [file 2025.loreslm-1.5.OptionalSupplementaryMaterial.zip]

## Sheet: Social_Satisfaction.csv
record_text	InRelationship (Single=1, Married=2, Unkown=0)	Has_Genreal_Comment	General_Comment (Positive=0, Negative=1, Neutral=2, Unkown=3)	Has_Specific_Comment	Specific_Comment (Positive=0, Negative=1, Neutral=2, Unkown=3)	Relevance
من وسط راه بودم نتونستم خیلی تو ترندینگ باشم [SMILING_FACE_WITH_TEAR] تولد پاپی جذابمون مبارک خوشتیپ ترین، شوهر ترین، ویتامین تینیا [RED_HEART] be with yunho goldenyunhoday	2	1	0	1	0	relevant
پلیس اتریش از کشف میلیونها یورو در چمدان همسر یک عضو پارلمان اوکراین خبر داد کشورش درگیر جنگ و این نماینده مشغول دزدی!	0	0	3	0	3	irrelevant
حالا در مورد زید یه خاکی بریز شوهر شد دوبار خاک بریز =)))	0	1	1	0	3	relevant
یه متن نوشته سنده؟؟ میخوای منم یه صفحه بنویسم از طرف همسر حججی همین حرف رو بنویسم	0	0	3	0	3	irrelevant
امشب حدود 10 بار ازم پرسیدن "خبری نیست؟" و من هر بار بد نگاشون کردم [UNAMUSED_FACE] خبر مرگ تو هست کثافت! شوهرم کجا بوده؟؟؟	1	1	2	0	3	irrelevant
رقص زن برای همسرش از نظر شرعی ایرادی نداره ولی موسیقی ای که باعث رقص بشه حرامه. تصور زنی که در سکوت داره جلوی همسرش می رقصه باعث شده نتونم بخوابم.	1	1	2	0	3	relevant
: دوست پسر من باید مثل خودم کاسب باشه یعنی چی ساعت 6 پیام میدین بریم بیرون؟ اوج بازاره دیوونه ها.	2	1	1	1	1	relevant
: ولی نمیشه خانوم ها 4تا شوهر کنن چهار به یک چی میشد:/ یچیزی میدونستنا! همون یکی ول کن ماجرا نیست!	0	1	0	0	3	relevant
یه عزیزی به اندازه جان ادم بعد از ده سال نهار امد خونمون یه حسرت ده ساله برطرف شد فک کنم این دیگه نماز شکر داره ممنونم از خانمم که خیلی زحمت کشید [SMIRKING_FACE][SMIRKING_FACE][SMIRKING_FACE]	2	1	0	1	0	relevant
: یه شوهر صدروزه دیگه ورژن خودمو خودت میخوام جناب دو.. :)	1	1	2	0	3	irrelevant
نه ولی تو خیلی شوهری شدی دیه،از ارث محرومی	0	1	0	0	3	relevant
مشکلتون با مچ پای کلفت چیه؟ صاحاب مچ باید چیکارش کنه…با تبر بزنتش؟ نکنید اقا…اعتماد به نفس ادما نسبت به بدن خودشون رو نابود نکنید.. سطح تخریب روانی که اینجور نظریات به افراد میده گاهن در حد افسردگی شدید طولانیه جوری که از بدن خودشون متنفر میشن	0	0	3	0	3	irrelevant
اونی که اون لاکشپت رو توییت کرد لعنت بهت زن من لاک پشتهای نینجا نوستالژیم بود الان وقتی بهش فکر میکنم اون سم میاد تو ذهنم	0	0	3	0	3	irrelevant
شوهر تینا ترنر که باهم خواننده های خیلی موفقی بودند، تمام 16 سال زندگی مشترکشون abuse اش میکرده، کتکش میزده، خیانت میکرده و یه بار اب جوش ریخته روش. یه روز بعد از یه دعوا، تینا فرار میکنه و میره یه شهر دیگه قایم میشه و بالاخره در 37 سالگی طلاق میگیره [BACKHAND_INDEX_POINTING_DOWN_LIGHT_SKIN_TONE]	0	1	1	0	3	relevant
این دنیا یه پارتنر که هی ببوستم و بگه ای روی دلارایت مجموعه ی زیبایی ها بم بدهکاره	1	1	0	0	3	irrelevant
من جداً به اون دسته از افرادی که پارتنر خوبی دارن و مدت زیادیه که باهم موندن، حسودی میکنم؛ چون واقعاً نمیدونم از کجا میشه ادمی پیدا کرد که هم نرمال باشه هم جفتتون از هم خوشتون بیاد.	1	1	0	0	3	irrelevant
ازدواج خیلی بده به غیر فامیلای خودت باید دید بازدید فامیلای همسرتم بری	2	1	1	1	1	relevant
شوهر یکی از دوستام هر وقت با دوستم میخواست بره رستوران میگفت بگو ونوسم بیاد اشتهامون باز شه:))	0	0	3	0	3	irrelevant
من یکی از فانتزی هام اینکه اگه ازدواج کردم همسرم از تبار کرد یا گیلک یا جنوب باشه و پر جمعیت.	1	1	0	0	3	relevant
بخدا هاری داشت اصن پاچه میگرف مث چی هیچکی جرات نداش باهاش حرف بزنه بعد فک کن بخوان بگیرنش [WOMAN_FACEPALMING_LIGHT_SKIN_TONE] البته اینم بگم سال اخر بودیم شوهر کرد بعد روز بعد عقدش با همون ارایش مراسمش اومده بود[FACE_WITH_TEARS_OF_JOY][FACE_WITH_TEARS_OF_JOY]	0	1	1	0	3	relevant
کریس مارتین تو مصاحبه با رادیو exafm در مورد پسرا گفته: صمیمانه ارزو میکنم اونا (بی تی اس) برنده جایزه گرمی شن، با اینک خودمم تو اون بخش نامزدم. و کلیم براشون ارزو موفقیت کرده چقد من این بشرو دوس دارم [PINCHED_FINGERS_LIGHT_SKIN_TONE]	0	0	3	0	3	irrelevant
شوهرت از خودت بد تره [FACE_WITH_TEARS_OF_JOY][FACE_WITH_TEARS_OF_JOY][RAISED_HAND] نه به شوهر عمه	0	1	1	0	3	irrelevant
میدونستین دخترای مجرد واسه خروج از کشور نیاز به رضایت پدر ندارن؟ بعد میدونستین وقتی ازدواج میکنین واسه گوزیدن هم به رضایت همسر نیاز داری؟دخترا بخدا که خونه بابا هامون بهتر از خونه شوهره. اینه قانون اساسی کشورم [MIDDLE_FINGER][CRYING_FACE]	1	1	1	1	1	relevant
خدمت از ماست. من همسر جانم شیرازیه و ایشالا یکی دو روز دیگه راهی میشیم اونجا. درود به همتون	2	1	0	1	0	relevant
یه بحران دیگه داریم که به نظر بحران اصلی اونه: بحرانِ بعد از اشنایی: اومد و با هزار درد سر و تلاش و شانس و اتفاق و دخالتِ کاینات یه پارتنر پیدا کردی، بعدش چی؟ خانواده ساپورت می کنه؟ می تونین خونه ای برای خودتون داشته باشید؟ تا چه مدت قراره باهم باشید؟ حرف ازدواج رو که اصلا نزن./	1	1	1	0	3	relevant
تکذیب میکنم شوهر منه [NAIL_POLISH_LIGHT_SKIN_TONE]	2	1	0	1	0	relevant
من میگم زنت / شوهرت چن وقت پیش زار میزد که فلانی اشتباهی که من کردمو تو نکن :))))	1	1	1	0	3	relevant
همه دوس پسراشونو به شوهر تبدیل کردن اونوقت من هنوز نتونستم یه پسرو به دوس پسر تبدیل کنم	1	1	1	1	1	irrelevant
: جواب «چرا ازدواج نمی کنی؟» تو عید دیدنی، فقط تو شوهرتو/زنتو بده من می گیرمه	1	1	1	0	3	irrelevant
وقتی میخوای بگی چقدر خانومی و وقت شوهر کردنته [FULL_MOON_FACE][FACE_WITH_TEARS_OF_JOY]	1	1	0	0	3	relevant
یکی از قوانین موبدان زرتشتی این بود که عروس قبل از این که خونه شوهر بره باید با یکی از موبدان زرتشتی می خوابید و سکس می کرد بعد خونه بخت میرفت	0	1	1	0	3	relevant
زدست و دیده و دل هر دو فریاد [RED_EXCLAMATION_MARK] که هر چه دیده بیند دل کند یاد بسازم خنجری نیشش ز پولاد زنم بر دیده تا دل گردد ازاد	0	0	3	0	3	irrelevant
چندتا موش رو میندازن تو یک جعبه و بهشون غذا نمیدن، موشها شروع میکنن به خوردن همدیگه اخرین موشی که باقی میمونه رو نمیکشن! ولش میکنن چون اون دیگه فقط موش میخوره. دقیقا این همون کاریه که جمهوری اسلامی با خانم ها کرده=)))	0	0	3	0	3	irrelevant
رابطه با ادمی که مناسب شما باشه نیاز به مراقبت و پایش داره. شما نمی تونید بگید چون همسرم/رفیقم/همکارم با من مچه پس خودم رو رها می کنم و از رابطه مون مراقبت نمی کنم. مثلا شما برای صمیمی ترین رفیق تون هم باید گاهی خودتون رو سانسور کنید یا تحملش کنید. این مراقبت از شما انرژی می گیره	1	1	0	0	3	relevant
چند وقتیه هر چی با مادرِ همسر صحبت می کنیم گوش هاش خوب نمی شنوه؛ امروز داشتم سوسکی در مورد فامیل های همسر از همسر سوال می کردم دیدم از اون طرفِ خونه همه رو جواب می ده [FACE_WITH_TEARS_OF_JOY] برای تستِ سنجشِ شنوایی ولوم رو درجه به درجه پایینتر اوردم بازهم همه رو جواب داد![FACE_WITH_TEARS_OF_JOY] من[EYES] همسر[EYES] عروس جهنمی[FACE_WITH_TEARS_OF_JOY][FACE_WITH_TEARS_OF_JOY]	2	1	1	1	1	relevant
دلم می خواد به مرد زنگ بزنم ولی تا الان چون بغض داشتم و می دونستم وسطش گریه می کنم و قطعا نمی تونم ادای ادم های پرانرژی رو در بیارم نزدم. سنگر مقاومت داره می شکنه.	2	1	0	1	0	relevant
نه نه، شاید درست نتونستم منظورمو برسونم، گاهی خانمها نیاز دارن بدونن که یه مرد حواسش بهشون هست،و متقابلا مردها نیاز دارن به همسرشون یا پارنترشون بفهمونن که پشتشون هستن…	0	1	0	0	3	relevant
یک شوهر پیدا کنید اسمش استاد حسین علیزاده باشه، یا مثلا کیهان کلهر.	1	1	0	0	3	relevant
چه بسته بندی خوشگلی هم دارن کجا قایم کنم از دست این مرد، مرسی مجدد [HIBISCUS][HIBISCUS] من همواره تکراری میزنم سالها کلید میکنم روی یه محصول و برند اما اینبار میخوام تست کنم بقیه برندا رو هم	0	0	3	0	3	irrelevant
فارس/ اسیدپاشی به روی همسر 17 ساله/ مجرم بازداشت شد	0	1	1	0	3	relevant
چند هزار جوان رو سرگردان کرده چند هزار نفر رو از روند زندگی عادیشون خارجشون کرده چند هزار زن متاهل رو در فشار سرباز بودن همسرشون گذاشته چند هزار کودک چوب خط تمام شدن سربازی پدرشون رو میشمارن چند هزار سرباز با انواع فشار های روانی بدترین حرف ها رو تحمل می کنند از سربازی بگو	0	1	1	0	3	relevant
ممنون می شم اگه زیدم از گشت و گذار برگرده و یذره هم ناز منو بکشه و لوسم کنه. چون که واقعا گریه دم دره [SMILING_FACE_WITH_TEAR]	2	1	1	1	1	relevant
من تا شوهر نکنم بهم عیدی میدن [NERD_FACE] حس خوبیه	1	1	0	1	0	irrelevant
با این درخواستای که خانومم از من داره منم شوهر میخوام دوستان	2	1	1	1	1	relevant
همسر قهرمان قیام ابان علی فتوحی بر سر مزار همسرش عهد بسته بودیم سال تحویل کنار هم باشیم . من به عهد خود با تو پایبندم عزیزم من کنارتو ام و تو در کنار من یک سال هم تموم شد و تقویممان عوض شد ومن هر روز استوارترم برای راهی که تو زندگی تو از دست دادی تا به فرزندان ایران زندگی ببخشی	2	1	0	0	3	relevant
نازنین زاغری که اخیراً از زندان رژیم ازاد شد در کنفرانس مطبوعاتی در لندن: عدالت در ایران معنایی ندارد.همان دو ،سه هفته اول در زندان به من گفتند که تا وقتی انگلیسی ها چیزی را که می خواهند ندهند،ازادت نمی کنیم همسر نازنین زاغری:رژیم ایران باز هم از شیوه گروگانگیری استفاده می کند	0	0	3	0	3	irrelevant
چقدر جنسی شوخی میکنن [NEUTRAL_FACE]بعد میگه به دوست پسرم نمیگم و به بقیه میگه چیزمغز. وای خدا حرص میخورم چقدر[EXPRESSIONLESS_FACE]	0	1	1	0	3	relevant
فرق اینارو میدونم. مثال گاو رو هم برات دو تا مثال گاو می زنم که بدونی از دور یه چیزی شنیدی. توی دهلی گاو ها رو می بستند که توی خیابون نیاد. طوری میبستند انگار که اسیر را بسته باشی. در بنارس گاوی امد توی باغچه گلگاری مالک باغچه با ترکه چنان ضربه های جانانه ای زد که گاو شش متر پرید	0	0	3	0	3	irrelevant
اگه میدونستم که حداقل سعی میکردم جز دوست دخترم با کس دیگه ای لاس نزنم [PLEADING_FACE][SMILING_FACE_WITH_TEAR]	2	1	1	1	1	relevant
عزیزم من میگم باید به پارتنرش میگفت و پارتنرش به من میگفت نه ادمی که من نمیشناسمش	0	0	3	0	3	irrelevant
: برنامه م اینه هر کی تو عیددیدنی گفت «چرا شوهر نمی کنی؟» جواب بدم «چون جق می زنم.»	1	1	1	0	3	irrelevant
2. خانم نگار جواهریان همسر رامبد جوانِ درسته؟ خب اینا اگر اشتباه نکنم پارسال یا سال قبل ترش بود که باردار بود و برای اینکه بچش اقامت کانادا رو داشته باشه رفتن بچشونو کانادا به دنیا اوردن…! حالا اینم به من ربط نداره ، ولی نکتش اینجاست…!	0	1	2	0	3	irrelevant
اره شوهرش یه اقایی بود یه یبار ازدواج کرده بود طلاق گرفته بود دوتا بچه 3و8 ساله داشت [WOMAN_WALKING] ولی خودمونم یادمه اون موقع میگفتیم بدبخت شوهره[FACE_WITH_TEARS_OF_JOY][FACE_WITH_TEARS_OF_JOY]	0	1	1	0	3	relevant
ببین من چیزی نگفتم که ایشون اشتباه برداشت کرد من اصلا هم با ایشون نبودم میخواستم تورو ریپ بزنم [FACE_WITH_ROLLING_EYES] من اصلا شوهر ندوست[LOUDLY_CRYING_FACE]	2	1	1	1	1	relevant
قطعا ادمهای تو ذهنتون یا رقص بلد نیستن یا اصن زن تو ذهنتون نیس نمیتونین تصور کنین یا تنظیمات ذهنتون بهم ریخته که رقص به این قشنگیو نمیبینین :)))	0	0	3	0	3	irrelevant
شوهر رو میندازن دور اخع	2	1	0	1	0	relevant
پارههههه پارتنرم نیست [LOUDLY_CRYING_FACE][FACE_WITH_TEARS_OF_JOY][FACE_WITH_TEARS_OF_JOY] ولی زیبا بود[NAIL_POLISH_LIGHT_SKIN_TONE][NAIL_POLISH_LIGHT_SKIN_TONE][NAIL_POLISH_LIGHT_SKIN_TONE]	1	1	0	0	3	irrelevant
: یادداشت همسر سابق یغما گلرویی: من از تو دروغ و خیانت را یاد گرفتم…	0	1	1	0	3	relevant
مروج چند همسری،،،فمینیست،،، مدافع حقوق زنان،،،همچنین وگن با هووی عزیزشونم زیر یه سقف زندگی میکنن خیلیم عاولی [WOMAN_WALKING_LIGHT_SKIN_TONE][WOMAN_WALKING_LIGHT_SKIN_TONE]	0	1	1	0	3	relevant
برو عزیز دلم… خیالت راحت… من ایستاده ام… حتی محکم تر از تو… باقی اش را بسپار به من… همسر شهید مدافع حرم محمد معافی در مراسم تشییع پیکر	0	1	0	0	3	relevant
هرچی بیشتر سطح زندگی و روابط زن و شوهرای اطرافمو میبینم انگیزه م واسه ازدواج نکردن بیشتر میشه! [FACE_WITH_ROLLING_EYES]	1	1	1	0	3	relevant
شاید داشتن یک همدم برای یک مرد راه فرار و پناهی باشد از دردهای زندگی مشترک،از کم و کاستی های یک همسر از ناسازگاری ها. یک تسکین دهنده و ارامش بخش یک مخدر یک مستی!	2	1	1	1	1	relevant
امشب اولین تتوم رو می زنم [SLIGHTLY_SMILING_FACE]	0	0	3	0	3	irrelevant
: ازدواج کنم این تابلو رو میزنم به در اتاق خواب	1	1	2	0	3	irrelevant
پارتنر خوبی برای بای هاس	2	1	0	1	0	relevant
هر چی جلوتر میرم به همسری نیاز پیدا میکنم که معتاد به کتاب باشه	1	1	0	0	3	irrelevant
دقیقا میخواستم بگم شوهر ندارین [FACE_WITH_TEARS_OF_JOY][FACE_WITH_TEARS_OF_JOY]	0	1	2	0	3	irrelevant
این ویدیو یکی از عجیب ترین فضاها رو داشت. همسر علی فتوحی از کشته شدگان ابان98 در لحظه ی تحویل سال در حال گل دادن به مردم در گورستان.	0	0	3	0	3	irrelevant
پارتنر خودش خیانته به رابطه مقدس ازدواج و تاهد.	2	1	1	0	3	relevant
تو مهمونی و عید دیدنی امشب بحث جذاب فامیل ازدواج و ادامه تحصیل من بود و چون اذعان داشتم برای ادامه تحصیل پیر شدم سوییچ کردن روی ازدواج منم با جمله خب کو؟ "شما یه الن دلونی هنری کویلی چیزی معرفی کن من همین فردا زنش می شم"دهانشون رو دوختم:) دست به دست کنید شوهرمونو پیدا کنیم امسال.	1	1	2	0	3	irrelevant
ماجرا جالب تر شد. خبرگزاری فارس یک گام جلوتر رفت و نوشت سرباز قاتل مشکل شخصی داشته است. احتمالا برای اینکه خدای ناکرده یکوقت ذهن ها به سمت اسیب شناسی بنیادین از این پدیده منسوخ صد ساله نرود حدس می زنم در عرض 24 ساعت اینده سرباز قاتل یک بیمار روانی معرفی خواهد شد.	0	0	3	0	3	irrelevant
اره بخدا، معلوم نیست الان شوهر من کدوم گورستونیه که ندارمش خاک بر سر رو [FACE_WITH_TEARS_OF_JOY][EXPRESSIONLESS_FACE] چه خوب [SMILING_FACE_WITH_HEART_EYES] مرسی کلی [FOLDED_HANDS_LIGHT_SKIN_TONE][HEART_SUIT]	2	1	1	1	1	relevant
یه تیکه ی شرک 3 هست اونجاش که شرک اون پسره که جانشین شاه بودو ول میکنه و میره، یه اهنگی پخش میشه که تداعی کننده مرگ شوهر و بچه ت توی یه تصادفه.	0	0	3	0	3	irrelevant
یه شوهر دیگه می خوای؟ [FACE_SCREAMING_IN_FEAR][FACE_SCREAMING_IN_FEAR][FACE_SCREAMING_IN_FEAR]	0	1	2	0	3	irrelevant
همانطور که مرد بدون داشتن همسر نمی تواند پدر شود؛ هیچ کشوری هم بدون بنگاه بزرگ صنعتی با ارتباطات قوی بین المللی و واحد تحقیق توسعه، نمیتواند دارای اقتصاد دانش بنیان شود یعنی فرزند میوه ازدواج مرد و زن است بنگاه دانش بنیان هم میوه بنگاه های بزرگ صنعتی و بین المللی است بدیهیات	0	1	2	0	3	relevant
همسر سیدعلی فتوحی شهید ابان98 : عهدبسته بودیم سال تحویل کنارهم باشیم من به عهد خودباتو پاینبدم عزیزم امسال سومی سال تحویلی ست که کنارمون نیستی اماایمان دارم که حضورداری یکسال هم تموم شد ومن هرروز استوارترم برای راهی که توزندگیتوازدست دادی تا به فرزندان ایران زندگی ببخشی نوروز	0	1	0	0	3	relevant
عا اونو ولش کن ابی ازش گرم. نمیشه من شوهر میخام [WOMAN_WALKING][SMILING_FACE_WITH_TEAR]	1	1	2	0	3	irrelevant
یعنی از این پفیوز تر خودشه ، حاله خوبه لرزه داره نداشت دیگه چی میشد ، مرتیکه پفیوز خاک بر سره اون خرهایی که برای شنیدن صدای توی پفیوز پول میدن که تو بکنی تو خیک زنت	0	0	3	0	3	irrelevant
مرد من هنوز دیویست گرمی نشدم تو روزی 2 کیلو میری بالا [FACE_WITH_TEARS_OF_JOY]	0	0	3	0	3	irrelevant
عروس خالم داره با افتخار میگه من بدون اجازه شوهرم نمیرم ابروهامو هاشور کنم با اینکه دوست دارم وات د فاک	0	1	1	0	3	relevant
عددی از دوستان نازنین پرسیدند: "با کله ی نامناسب از دست فامیل باید چه کار کرد" غر نمی زنم ولی خب سوال بنده هم هست. چه باید کرد؟	0	0	3	0	3	irrelevant
اصن گیرم اشتی کردن برگشتن رابطه ای که توش حرمتا بگا رفته احترام اینجوری مادرش شوهر داده شده چجوری درست میشه!	0	1	1	0	3	relevant
خدای من چی میشد کنار درد پریودی یکم صبر و حوصله یا نهایت یه پارتنر مهربونه ماساژور بهم میدادی؟	1	1	0	0	3	irrelevant
کتاب"کولی ها هم عاشق می شوند"داستان عشق یک گاوباز به زن شوهردار کولی در«وهران»از شهرهای الجزایر است؛در کنار ان"گاو بازی"مبارزه با اشغالگری فرانسه و کشتن کولی ها توسط نازی ها پرداخته شده است.کلیت داستان گفتگومحور و شعاری است.کتاب،اگر سال1900 چاپ می شد،برای نویسنده اش شهرت می اورد.	0	0	3	0	3	irrelevant
منم اومدم یه سر بزنم برم :) خوبم عزیزم تو خوبی؟	0	0	3	0	3	irrelevant
نزار شوهر همکارت و صدا کنما وهاب [ROLLING_ON_THE_FLOOR_LAUGHING][ROLLING_ON_THE_FLOOR_LAUGHING] از من بترس [OGRE][SMILING_FACE_WITH_HORNS]	0	0	3	0	3	irrelevant
چطوری به سلیقه من در انتخاب پارتنر، اعتماد می کنی؟	2	1	1	1	1	relevant
خداروشکر دختر دارم [RELIEVED_FACE] چون حتما مادر شوهر بدی میشدم!!!! [SMILING_FACE_WITH_HORNS]	2	0	3	0	3	irrelevant
اقای رییسی این شوهر می خواد [FACE_WITH_TEARS_OF_JOY]	0	1	2	0	3	irrelevant
ایشالله یه پارتنر خوب پیدا میکنی [FACE_BLOWING_A_KISS]	0	1	2	0	3	irrelevant
: ولاگ دوست پسر ترین شوهر دنیا رو ندیدم هنوز. غم دارم:(	2	1	0	1	0	relevant
امسال چقدر خطرناک شروع شده. همه دخترا یهو هوس شوهر کردن	0	1	2	0	3	irrelevant
وقتی زنت (یا دوستت یا خواهرت )تازه کلاس نقاشی رفته و مجبوری خودت هنر هاشو بزنی به دیوار خونه چون کسی نمیخرش دیگه و چاره ای نداره [FACE_WITH_TEARS_OF_JOY][FACE_WITH_TEARS_OF_JOY][FACE_WITH_TEARS_OF_JOY]	2	1	1	1	1	relevant
: منشن 50 تا شه ریت 40 تا و 30 تا لایک ، ک هیچوقت نمیشه ولی اومید وار میمونم ،زنم بهتون معرفی میکنم.	2	0	3	0	3	irrelevant
البته که جسارت نمیکنم برا همسر شما خودم رو میگم انتخابم کسیه که با رفیقامون بخوایم بریم بیرون اوکی باشه نه بگه با خانواده بریم	1	1	1	0	3	relevant
به تنها محمدی که گفتم ممد زیدم بود [FACE_WITH_TEARS_OF_JOY][FACE_WITH_TEARS_OF_JOY]همیشه خاص بودم[PINCHED_FINGERS_LIGHT_SKIN_TONE]	2	0	3	0	3	irrelevant
مشکل اینجاس شوهر تو رو نمیقوله	2	1	2	1	2	irrelevant
با هر نگاه بر اسمان این خاک هزار بوسه میزنم/نفسم را از رود سپید و اسمان خزر و خلیج همیشگی فارس میگیرم/من نگاهم از تنب کوچک و بزرگ و ابوموسی نورمیگیرد/من عشقم را در کوه گواتر در سرخس و خرمشهر به زبان مادری فریاد خواهم زد/بر اسمان ابی این خاک و خلیج همیشگی فارس فارس فارس خواهد بود	0	0	3	0	3	irrelevant
من خارج از ایران هستم، استاد دانشگاه هستم، درامدم به دلار هست، همسرم هم کار میکنه (خانواده دو درامدی هستیم) ولی هنوز هم 25 مفت برای از دست دادن نداریم. هر کسی گفته چیزی نیست یا خیلی پول درمیاره یا تا حالا پول در نیاورده.	2	0	3	0	3	irrelevant
والا من همسر ندارم این بحث برا دوستم پیش اومده بود خیلی شدید اومدم ببینم بقیه چی میگن [GRINNING_FACE_WITH_SWEAT][GRINNING_FACE_WITH_SWEAT]	1	1	2	0	3	irrelevant
: سیزده به در با خانواده همسر باید بریم یا خانواده خودمون؟	2	1	2	1	2	relevant
همکار سابقم با شوهر و بچه یه سفر کاری/تفریحی رفتن austin، برام چند تا عکس داده از خودش و دختر 4 سالش که داره با یکی بازی میکنه تو یه مهمونی. دقت کردم دیدم nikolaj coster [EXPLODING_HEAD] به شدت به بچه 4 ساله حسودیم شد	0	0	3	0	3	irrelevant
من که از خدامه!!! ولی خانمم اجازه نمیده!!!! [ROLLING_ON_THE_FLOOR_LAUGHING][ROLLING_ON_THE_FLOOR_LAUGHING][ROLLING_ON_THE_FLOOR_LAUGHING][ROLLING_ON_THE_FLOOR_LAUGHING]	2	1	1	1	1	relevant
یه فامیل هیز داریم یه بار که خیلی بی اعصاب بودم دیدم سر شام از اول تا اخر زل زده منو نگاه میکنه هی هیچی نگفتم اخر به زنش بلند گفتم شوهرت چشاش چپ شده انگار فک کنم اینم ازون کارای بدم بود که کردم :/	0	1	1	0	3	relevant
به جریت می تونم بگم سربازی تو ایران یکی از بی فایده ترین، بودجه حروم کن ترین، مسخره ترین، واهی ترین و پوچ ترین فعالیت های ممکنه! 2 سالِ تمام بچه ی مردمو عصبی، منزوی، افسرده و سرخورده می کنن…اخرشم میگن خب حالا دیگه مرد شدی الان وقتشه زنم بگیری که پروسه مرد شدنت کامل بشه!!!	0	1	1	0	3	relevant
[SMALL_BLUE_DIAMOND]قضاوت 90 [SMALL_BLUE_DIAMOND]معذوریت[SMALL_BLUE_DIAMOND] رشتو چند نفر نزد عمر امده گواهی دادند که فلان زن با مردی اجنبی در بیابانی زنا کرده است، ان زن شوهر داشت. عمر دستور داد او را سنگسار کنند. زن به درگاه خدا عرضه داشت: خدایا! تو می دانی که من بی گناه هستم. قضاوت [BACKHAND_INDEX_POINTING_DOWN][BACKHAND_INDEX_POINTING_DOWN]	0	1	1	0	3	relevant
یکی از جذابیتامه واسه همین زنم شدی [DROOLING_FACE][SMILING_FACE_WITH_HEART_EYES]	2	1	0	1	0	relevant
عجب داستانی مرد سرمایه داری در شهری زندگی میکرد اما به هیچکس ریالی کمک نمیکرد. فرزندی هم نداشت. و تنها با همسرش زندگی میکرد. در عوض قصابی در ان شهر بود که به نیازمندان گوشت رایگان میداد. روز به روز نفرت مردم از شخص سرمایه دار بیشتر میشد مردم هرچه او را نصیحت میکردند ادامه [DOWN_ARROW]	0	0	3	0	3	irrelevant
و دوست دختر من	2	1	2	1	2	relevant
اینم از دردسرهای شوهر داشتن روز اول سال بره حکم بازی کنه زنش همسرش عشقش بشینه خونه	2	1	1	1	1	relevant
ایشون همسر شروین نکویی هستن، این جشنواره نوروز رو هم با هم برنامه ریزی کردن	0	1	0	0	3	relevant
ایشان سال 89 همسر کس دیگه ای بودن. چرا اسم او را نمیبرید؟	0	1	2	0	3	relevant
وخزن بیاین کرمون. ما ذوق میکنیم تو شهر چادر میزنید ا تو بازار قوتو میخرن. تازه خیلی هاتون هم مردم میبرن خونه شون پذیرایی میکنند. یک شب بارونی شوهر خالم یک جمع 15 نفره بلوچ رو از در بیمارستان برد خونه اش. هنوز دوستند. قدمتون ور تخم چشممون	0	0	3	0	3	irrelevant
: اقا منی که تازه واردمو حمایت نمیکنین؟ فالو کنین بک میدم توییتاتونو منشن کنین منشن بزنم.	0	0	3	0	3	irrelevant
یکی از همکارای خانم رفتن تو جنگل چادر زدن تو بغل شوهرش استوری گذاشته جای همه عزیزان خالیه چرا باید الان جای من اونجا خالی باشه میخوای شوهر گولاخت ترتیب مارم بده. [NEUTRAL_FACE]	1	1	1	0	3	irrelevant
ربطی به جنسیت نداره. حواشیه که راجع به این ادم و همسرش وجود داره. همین حواشی تو کیس های دیگه میتونه درمورد شوهر یه فرد دیگه ای هم باشه که بگن همه چی تقصیر اونه.	0	0	3	0	3	irrelevant
خب بنظرم سکس پارتنر و… خیلی کسشرن، چجوری با یکی سکس داشته باشی یا حتی صحبتی کنی درحالی که هیچ احساساتی بهش نداری	2	1	1	1	1	relevant
مرحوم ری شهری مانند دیگر نماد اصلاحات، حسن روحانی به کودک همسری علاقه داشتند به نحوی که پارسال پس از پنجاه سال زندگی مشترک تازه همسرشان هجده ساله شد	0	1	1	0	3	relevant
: ان شاالله سال جدید همه مجرد های توییتر همسر صالح،مومن،خوش اخلاق و مورد پسندشون نصیبشون بشه (: بلند بگو امینننن [PALMS_UP_TOGETHER]	0	1	2	0	3	irrelevant
میدونستی خیلی از تجاوزها با خوروندن مواد خواب اور و اصلاً بدون اینکه زن یادش بیاد چه اتفاق افتاده صورت گرفته؟ یا توسط شوهر بدون رضایت همسرش به بارداری! شما حقوق زن رو نمیتونید رعایت کنید میاید واسه بچه تو شکم خودش نگران میشید؟خاک بر سرت	0	1	1	0	3	relevant
من احساساتم لحظه ایه متاسفانه [PENSIVE_FACE] بعدم شوهر با کراش جایگاهش فرق داره	1	1	1	1	1	relevant
شوهر به زن گفت تو ادعا میکنی بیست نفر خواستگار داشتی زن پاسخ داد بله، بلکه بیشتر؛ مرد گفت پس خوب بود با یکی از همان احمق ها ازدواج میکردی زن گفت اتفاقا همین کار را کردم	0	1	1	0	3	relevant
منم پنسکشوالم و پارتنرم نانباینریه داشتم فکر میکردم اگه توی توییتر فعالیت داشت از دیدن تو خیلی خوشحال میشد [BLUE_HEART]	2	1	2	1	2	relevant
اگد نزن به بختت دختر . در این بی شوهری ، یهو میبینی از دل همین فامیل یکی در میاد با اسب سفید بالدار [GRINNING_FACE_WITH_SMILING_EYES][WINKING_FACE]	0	1	2	0	3	relevant
دلم برای بچگیم تنگ شده بازی کنم از ته دل بخندم ندونم اینده یا گذشته چیه به اندازه کافی عمیق بخوابم تنها غصه ام ماهی عیدی باشه که زود مرد بزرگترین ارزوم داشتن جوجه رنگی باشه عکس برگردون ادمس خرسی بزنم و فکر کنم خیلی باحالم کوچیک باشم اما تو دنیای خودم پادشاه خوشحالی باشم…	0	0	3	0	3	irrelevant
تیپیکال دختر خاله من : شوهر خودمه ، مال خودمه ، خودم شوهر کردم بقیه بلد نیستن و تو همه جمع ها میرم پهلوش میچسبم بهش چون مال خودمه. [SLIGHTLY_SMILING_FACE]	1	1	1	0	3	relevant
می شینم حرفامو به ماه می زنم	1	0	3	0	3	irrelevant
[ROLLING_ON_THE_FLOOR_LAUGHING][ROLLING_ON_THE_FLOOR_LAUGHING][ROLLING_ON_THE_FLOOR_LAUGHING][FACE_WITH_TEARS_OF_JOY] واقعیت همینه. منم ازش خوشم نمیومد به زور زنم نگاه میکردم. اون دوست داشت	2	1	1	1	1	relevant
دلم واسش تنگ شد، یک مورد اروژانسی، من همسر خوبیم، بعضی وقتام فحش میدی=)=)	2	1	0	1	0	relevant
: در قفس خیال تو تکیه زنم به انتظار تا که تو بشکنی قفس پر بکشم به سوی تو کمال جعفری امامزاده همایون جان شجریان	0	0	3	0	3	irrelevant
: وقتی اینو خوند فروزه زنش بود، الان با شوهر مهشیده! خیلی مهمه با کی دم خور باشید عزیزان	0	1	2	0	3	irrelevant
البته از دلقک ننر با اون برنامه خنک و مزخرف و جلفت ارایه این خزعبلات چرند جای تعجب نیست. اتفاقا چند وقت پیش که تبلیغ حق چندهمسری رو برا خانومها میکردی عکسی از خودت و همسرت که وسط رضا روحانی و حامد نیک پی و حسین تهی لم داده بود دیدم. واقعا فهمیدم مرد عملی الکی شعار نمیدی!!	0	1	1	0	3	relevant
جنگ در اوکراین در برلین کنسرتی با شرکت بیش از ده هزار نفردر میدان براندنبورگ در همبستگی با اوکراین برگزار شد،در این کنسرت از جمله خانم ناتالیا کلیچکو خواننده مشهور اوکراین و همسر شهردار کی یف پس از قدردانی وتشکر از مردم جهان به خاطر حمایت از اوکراین به اجرای ترانه پرداخت روسیه	0	0	3	0	3	irrelevant
ما یک فامیل داریم خیلی فضوله، دخترای خودشو تا 20 سالگی به زور شوهر داده، هر سه تاشون هم کلی مشکل دارن و احساس بدبختی دارن. یک سال عید بهم گفت که: «داره دیر میشه، موندی ها!!!» با لبخند ملیح بهش گفتم دخترای شما که زود رفتن الان خوشبختن؟ سکوت کرد و دیگه هرگز گیر نداد به من [BEAMING_FACE_WITH_SMILING_EYES][FLEXED_BICEPS_LIGHT_SKIN_TONE]	1	1	1	0	3	irrelevant
باباش اگه موافق نباشه اصن به درجه ی شوهری نمیرسه	0	1	1	0	3	relevant
اقاااا من الان دیدمم ک دارم با ی مدرس زباننن حرف میزنمم [SMILING_FACE_WITH_HEART_EYES][FULL_MOON_FACE] منم دارم برای ایلتس میخونمم[VICTORY_HAND_LIGHT_SKIN_TONE]	0	0	3	0	3	irrelevant
عشقم به جز تو ، تو که زیدمی	2	1	2	1	0	relevant
من در حال حاضر سربازم سختی های سرباز بودن نه فقط روی دوش من بلکه برای خونوادم خصوصا مادرم و پارتنرم هم بوده سوال اینجاست که چطور یه جنبش با عقیده های سکسیستی میتونه اینقدر سیاه باشه که از سختی هایی که یه عده ادم در حال تجربه هستن احساس خوبی داشته باشه و براشون بیشتر بخواد؟ [SLIGHTLY_SMILING_FACE]	2	1	1	1	1	relevant
تو خیلی پولداری. من میزارم شب نت نامحدود دانلود کنم همیشه. اگه مشکلی نداری میتونم زنت بشم من.	1	1	0	1	0	relevant
فقط دوست دخترم می تونه رو تختم بخابع من رو تختم حساسم [DOTTED_LINE_FACE]	2	1	0	1	0	relevant
به شوهرم گفتم بیا بریم خونه مامانت اینا کباب بخوریم خندش گرفته میگه شیکموی منی تو ༎ຶ‿༎ຶ sehun sehun exo kai peaches	2	1	2	1	0	relevant
ببین موقع ناراحتی پارتنر شما داری روی یک تیغ راه میری باید خیلی خوش شانس باشی دهنت سرویس نشه	2	1	2	1	1	relevant
میگم مبارک باشه ان شاالله به درک زندگی متاهلی رسیده باشه	1	1	0	0	3	relevant
اونی که خیلی بلند و غلیظ شوهرشو صدا کرد «همسررررررم» چی پس؟ [MOAI]	0	1	2	0	3	relevant
زن ، شوهر هر دوتا مهمن! واقعا رو هم اثر میذارن	0	1	0	0	3	relevant
همه زدن نامه به همسر اینده بچه اینده اسم هم انتخاب کردن [NEUTRAL_FACE][GRINNING_FACE_WITH_SMILING_EYES][FACE_WITH_HAND_OVER_MOUTH][GRINNING_FACE_WITH_SWEAT][MAN_FACEPALMING_LIGHT_SKIN_TONE][MAN_TIPPING_HAND_LIGHT_SKIN_TONE]	1	1	2	0	3	irrelevant
تا به این جای عید دیدنی ها، همه معتقدن کار خوبی ندارم و دارم به خودم صدمه می زنم. در نتیجه باید دنبال یه کار غیرکامپیوتری مثلا مغازه زدن باشم [SMILING_FACE_WITH_TEAR]	0	0	3	0	3	irrelevant
[FACE_WITH_TEARS_OF_JOY][FACE_WITH_TEARS_OF_JOY] باوو مگه اختیاریه ،اگ پارتنرت نباشه و جاست فرندت باشه خب من به روم نمیارم چون اسکله ولی خب اگه پارتنر باشه داستان فرق داره	1	1	2	1	2	relevant
اگه دوست دخترم، پسر باشه چی؟	2	1	2	1	1	irrelevant
: من تو ی تویتر فقط و فقط دنبال شوهرم ، بهم پیشنهاد دوستی و رابطه ندین ، میای خاستگاری بسم الله	1	1	2	0	3	irrelevant
"در محکمه با دار تو گر شادانی من دار تو و طنز به هم امیزم قصاب شدی؟ بیا دو صد چاقو زن من خونِ تو را بدین قلم می ریزم…" نوروز مرگ بر کلیت و تمامیت جمهوری اسلامی	0	0	3	0	3	irrelevant
من منظورم همون دوست دختر و پسره ک خیانتی ب احساسات انسانی هست.. از لحاظ همسر و تاهد واقعی کاملا با متن موافقم ..دوست عزیز	0	1	1	0	3	relevant
در جواب چرا زن نمیگیری به شوهر خالم گفتم منتظرم زنت طلاق بگیره یهو همه ساکت شدن	1	1	1	0	3	irrelevant
: اگه شمام برای وقت گذرونی ( ن برای پیدا کردن رفیق و پارتنر ) اومدین توییتر سلام [HANDSHAKE]	1	1	2	0	3	irrelevant
پرسیدن همسر چطوره؟ گفتم: ممنون منزل مامانشون هستن مامان خودم چند ثانیه هنگ بود و می رفت که تایید کنه که … [BEAMING_FACE_WITH_SMILING_EYES][BEAMING_FACE_WITH_SMILING_EYES][BEAMING_FACE_WITH_SMILING_EYES][BEAMING_FACE_WITH_SMILING_EYES]	1	1	2	1	2	irrelevant
در مورد لیلیث همسر اول حضرت ادم شنیده اید ؟ خیلی سال قبل وقتی در باره دلایل و ریشه های مرد سالاری و تفکر تسلط مردان بر زنان در فرهنگهای مختلف تحقیق می کردم با متونی برخوردم که اون زمان زیاد بهش دقت نکردم اگر علاقه مند بودید حتما در موردش مطالعه کنید	0	1	2	0	3	relevant
ای واااای عجب داستانی [WOMAN_FACEPALMING_LIGHT_SKIN_TONE] ولی باید بگم دنیا انقد مسخرست که دوست من متارکه کرده بود بعد 6 سال رفته بود اسپانیا سفر، با همسر سابقش تو یه تور بودن [FACE_WITH_TEARS_OF_JOY][FACE_WITH_TEARS_OF_JOY][FACE_WITH_TEARS_OF_JOY]	0	1	2	0	3	relevant
از تاریخ رند فقط 45 دقیقه مونده کدوم گورین پ فردا دیه رل نمی زنم [BROKEN_HEART]	1	1	2	1	2	irrelevant
: چطور دوس پسرتون رو به شوهر تبدیل میکنید؟! ما نهایتا بچه مردمو بزرگ میکنیم که بشه شوهر بقیه	1	1	1	1	1	irrelevant
مجردی خوش بگذره ولی متاهلی نصیبتون بشه بزودی ان شاالله [FACE_WITH_TEARS_OF_JOY]	2	1	2	0	3	irrelevant
تصمیمی هست که همسرش گرفته یا دوتایی با هم گرفتن یا تحت شرایط خاصی گرفته شده و لزوما بمعنی منفعل بودن خانم نیست. یکمم بی انصافیه که همه خانمای خونه دارو کاملا منفعل و خونه نشین بدونیم حتی اگه خودمونم شاغلیم. شرایط و زندگی ادما و محیط زندگیشون خیلی با هم فرق داره.	0	1	1	0	3	relevant
بهش بگو شوهر داری	2	1	1	1	1	relevant
رابطه من با پارتنرم داره اینجوری پیش میره که هر لحظه به خودم میگم این منم تو این رابطه!!!	2	1	1	1	1	relevant
یه بار با این تور مسافرتیهای بازنشستگی رفتیم مسافرت، روز دوم سر و صدا و زد و خورد توی راهرو زیاد شد و بعدش پلیس یکی از مسافرای پیرمرد رو با چندتا زن توی اتاقش گرفت! پیرمرده چند نفر رو اورده بود، موقع پول دادن که رسیده گفته پای کاروانه!	0	1	1	0	3	irrelevant
قرار شده 300 دلار بدهند برای غذاهای که دور انداختیم. زیاد قر نمی زنم	0	0	3	0	3	irrelevant
امام علی: شکافته شدن از فرق سر تا باسن توسط جهان پهلوان ابن ملجم امام حسن: مسموم شدن توسط یکی از همسرانش به دلیل حسادت و زن بازی حسن امام حسین: تیکه تیکه شدن خودش و یارانش و بچه 6 ماهش توسط ارتش قدرتمند یزید همچنان بچه شیعه: هرکس با ال علی در افتاد، ور افتاد.	0	0	3	0	3	irrelevant
پسرهام باید شوهر کنن دیگه با این اوضاع	1	1	3	0	3	irrelevant
توی گینس هم چند مورد ثبت شده که چندشوهری رسمه توی بعضی قبیله ها و قانونا ازدواج میکنن [GRINNING_FACE_WITH_SWEAT][FULL_MOON_FACE]	0	1	2	0	3	relevant
خیییییییییلی سرده من دارم یه می زنم	0	0	3	0	3	irrelevant
خدایا کسانی که در سال که گذشت بی همسر شدند سریعا و عاجلا همسردار بفرما	0	1	2	0	3	irrelevant
جالب است هنوز هم برخی از رسم جاهلیت تبعیت می کنند و دست درازی می نمایند. زهی تاسف.. در کتاب التفسیر الکبیر امده است که به دستور پیامبر، هیچ مردی اجازه کتک زدن همسر خود را نداشت و اگر مردی دچار چنین خطایی می شد، همسر او اجازه قصاص داشت، یعنی می توانست شوهر خود را تنبیه کند.	0	1	1	0	3	relevant
دلم ی پارتنر می خواد که با جر و بحث سنگین باز کنار بیایم و مثل این الد مرید کاپل ها باشیم	1	1	2	1	2	irrelevant
نوبتی کنین یه سال اینور یه سال اونور یا تقسیم کنید تا یه ساعتی پیش خونواده همسر بعدش خونواده خودتون	0	1	2	0	3	relevant
: بعد از گفتن این واقعه به مامانم ،مامان گفت ببینم عرضه داری شوهر نخواستم،دوست پسر بگیری اصلا [FACE_WITH_TEARS_OF_JOY][BROKEN_HEART]	1	1	1	1	1	relevant
همسر منم جوری می چسبونه به جدول که با کله می افتم تو جوب	2	1	1	1	1	relevant
سرباز متاهلی داشتیم مرخصی میخواست گفتن باید 2روز 24ساعتی نگهبانی بده تموم که شد گیردادن سرویس بهداشتی ها رو بشور اونم انجام داد موقع مرخصی گفتن موهات باید با صفر بزنی هر چی گریه کرد دارم میرم پیش نامزدم بر میگردم میزنم مسیول ما لج کرد تا موهات نزنی نمیزارم بری… ادامه [BACKHAND_INDEX_POINTING_DOWN]	0	1	1	0	3	relevant
دادخواهی خبر مرگ ری شهری جنایتکار مرا یاد سخنان یکی از اعضای حزب ملت ایران انداخت که در زندان ری شهری (وزیر) بازجویی اش کرده بود… شبی (نزدیک صبح) به خانه اش زنگ می زنند و به همسرش می گویند که شوهرت اعدام شده بیا اوین وسایلش را بگیر… همسرش همان دم سکته کرده و درگذشته بود…	0	1	1	0	3	relevant
مگه پارتنر شما تاچتون میکنه؟	0	1	2	0	3	relevant
عیدی ، به همسر و دوس پسراتون دادید یا ندادید هنوز ؟!!! [FACE_WITH_RAISED_EYEBROW] اگه ندادید بدید هاااااا نذارید بگذره زمانش ماهی رو باید تازه گرفت	0	1	2	0	3	relevant
: کافیه خواهر کوچیکم یه عکس از پسرا تو گوشیم ببینه داد بزنه عهههه شوهرت	1	1	2	0	3	irrelevant
والا اگه میدونستم کیه اینجا نبودم الان [PENSIVE_FACE] خونه پدر شوهر پسته میخوردم[PENSIVE_FACE]	1	1	1	0	3	irrelevant
عید فطر بود که همسرم رو هدیه گرفتم از خودِ خدا [RELIEVED_FACE][RELIEVED_FACE]	2	1	0	1	0	relevant
وقتی مهشید و پسرش ابراهیم حامدی رو گروگان گرفتن و با ابروی هنری اش برای دلارهای عربی از کنسرت تنتورا تا دبی چوب حراج می زنند چه باید گفت ،هنرمندی که هنجره اش یاری نمی کند ولی همسر کاسب اش بی خیال نمیشه مرد حداقل بذار خاطرات خوب مانابود نشود . خلیج فارس	0	1	1	0	3	relevant
هم اکنون ذهن من : میخوان میخوان زنم بدن من زن نمیخوام.. عروس به مادرم بدن من زن نمیخوام ربطی نداره ولی هرکی میگه من زن میخوام با این میوفتم [NEUTRAL_FACE][BROKEN_HEART]	1	1	2	0	3	irrelevant
همسر من 15 سالش بود موقع عقد ،کجایی کاری	2	1	0	1	0	relevant
یک مرد ژاپنی که همسرش 11 سال پیش در جریان سونامی مفقود شد، غواصی یاد گرفته واسه یافتن جسد همسرش! هر هفته میره غواصی به امید یافتن اثری از خانمش! والله مرد ایرانی بود بعد 11 روز همسر دیگری اختیار میکرد [WOMAN_WALKING][WOMAN_WALKING][WOMAN_WALKING]	0	1	0	0	3	relevant
بین اشنایان، دوستان یا همسایگان دختربچهٔ 9 ساله دیدید؟ خوب، حالا تصور کنید یه مَرد 20 ساله شوهرش بشه! این ری شهری هم چین جانوری بود. دیگر، جنایت هاش رو هم حساب کنید.	0	1	1	0	3	relevant
این تهمت زشت و توهین شرم اور مجتبی ذوالنوری نماینده فعلی مجلس و جانشین نماینده ولی فقیه در سپاه به همسر محترم شهید حمید اقای باکری در سال 88 را….. چی بگم هرچی بگم میشه فحاشی…	0	0	3	0	3	irrelevant
استاد شهریار شعر زیبایی داره که میگه: کو نِی زن میـخانه بـگــو جــان به لب اور تا با تب و لب بــر لب جــانانه بمیـرم ان ســلســله ی زلـف که زنار دلــم بــود در گردنـم اویز که دیـــوانه بمیــــــرم البته یکم طول کشید تا متوجه شدم با همسر صاحب میخانه خصومت شخصی نداشته.	0	0	3	0	3	irrelevant
باور کن این نودهایی که اینا توییتش میکننو من اگه ازدواجم بکنم روم نمیشه واسه شوهرم بفرستم [EXPRESSIONLESS_FACE]	1	0	3	0	3	irrelevant
مگه چن سالته که دوستات دارن شوهر میکنن	0	1	2	0	3	relevant
اگه زیدم این طوری که مامان بابام همو دوس دارن دوسم نداشته باشه، دورش میندازم- -	1	1	0	1	2	relevant
دوست دارم انقدر پولدار بشم که وقتی صبحا غلت می زنم از تختم بیفتم پایین.	0	0	3	0	3	irrelevant
مهین تاج، افت، شهپر، مهوش پریوش، چه بد کرد غلط کرد شوهر کرد همه را دربدر کرد	0	0	3	0	3	irrelevant
بارها از من دور خواهی شد، و زان پس برای همیشه مرا یارای ان نیست که مهار زنم توسنِ رنجی که می تازد درون سینه ام، رنجِ تنها بودن… [MEMO] شاعران جهان	0	0	3	0	3	irrelevant
جـوریهمه دور برم شوهر کردن، بچه دارن مابقی هم جوری دنبال رابطه و شوهر پیدا کردنن که انگاری کوفت باشه فقط رابطه باشه ! چتونه؟ جا داره به اولین نفری که از زیر پنجره مون رد شد پیشنهاد ازدواج بدم !	0	0	3	0	3	irrelevant
اگه زنم مثه اون نرقصه چی [SMILING_FACE_WITH_TEAR]	0	0	3	0	3	irrelevant
در اولین روز سفر نوروزی فهمیدم باید سلیقه مشترک در موسیقی برای ماشین رو هم جزو معیار هام برای همسر ایندم قرار بدم [PERSON_FACEPALMING] اینا منو کَر کردن	1	1	1	0	3	irrelevant
اینجا بارون زده سبزه همه جا خونه ی ما هم توی کوچه نیست ،چسبیده به فضای باز هستیم خونمون پر از گربه نوروزی شده بدبختانه خانمم از اینها بدش میاد روزی 3 کیلو جمع میکنم میریزم پشت دیوار خونه رو تپه [PERSON_FACEPALMING][PERSON_FACEPALMING]	2	1	1	1	1	relevant
من مادر و همسر شهید زیاد دیده ام. با عشق پشت مردان شان اب ریختند درحالیکه می دانستند هیچ برگشتی در کار نیست. ولی فکر مادر این 5 سرباز رهایم نمی کند. با هزار ارزو پسر بزرگ کنی بعد برای کارت پایان خدمت بفرستی سربازی اجباری و روز اول عید جنازه را تحویل بگیری. [استوری خواهر سرباز]	0	1	1	0	3	irrelevant
نظری در مورد پرچم جمهوری اسلامی توسط همسر رضا پهلوی یاسمین(که عکسشم رو پروفایلشه) در روز 22 بهمن نداره؟ نه بازی تیم ملی بود نه جام جهانی صعود قطعی شده بود و فقط 22 بهمن بود!! تو اون کلیپ یک پرچم شیرخورشیدم نبود جدی بیا و نظرت راجع به اون بگو منتظرم	0	0	3	0	3	irrelevant
: الان باید خاله شوهرم زنگ میزد برای شام دعوت میکرد، نه این که از بیکاری بشینم لاک بزنم پاک کنم.	1	1	1	0	3	irrelevant
3 ماه پیش داشتم با لپتاپ کار میکردم ساعت 2 شب یهو دیدم دستم خیس شد نگاه کردم دیدم خون اومده. همینجوری داشت بیشتر میشد شوک شدم دستمو بردم جلو بینیم و دیدم پر از خون. بلند شدم دوییدم تو دستشویی و تو یه چشم بهم زدن کل دستشویی پر خون شد، همسرم رو صدا کردم و گفتم زنگ بزنه اورژانس	2	0	3	0	3	irrelevant
کجاست سرکار خانوم که نریم ؟؟؟ چون مثل شما حوصله نمیکنیم و با همسر و بچه نمیشه که ؛ باید پارشون کرد اونوقت	2	1	1	1	1	relevant
اینم دیدم فشار بقول میگم زنم بیاد جرت بده	2	1	0	1	0	irrelevant
به نظرم اونی که انقدر واضح میاد می پرسه چرا شوهر نمیکنی دنبال شریک همراه برای زندگی نیست منظورش اینه که الان تو دلت میخواد و اگه از راهی که ما میگیم رفع و رجوع نشه تو مشکل داری!! پس یا مشکل جنسی داری یا خرابی که شوهر نمیکنی! (اینو به عینه دیدم)	1	1	1	0	3	irrelevant
چنین مثالی که شما زدی شاید در سال های اولیه یک فرد کم حرف تر باشه و دیگری پر حرف تر اما همیشه همسران روی هم تاثیر میزارن چه مثبت و چه منفی . بنابراین چون اساسا" اگر همسری به رابطه علاقه مند باشه و به فرد علاقه مند بشه در مسیری می افته	0	1	2	0	3	relevant
مکالمه جالب بین یک زن و مرد پفیوزی که اومده از این شناگر ترنس دفاع کنه: زنه میگه: من یه زنم و اون یک زن نیست. مرده: ایا تو یک بایالوژیست هستی؟ زنه: نه من دامپزشک نیستم ولی میدونم سگ چیه. تو داری از یه استدلال احمقانه استفاده میکنی برای این که هیچ استدلالی نداری.	0	0	3	0	3	irrelevant
پس اون پارتنر دامینیت من که قراره پیداش بشه کجاستتت؟	1	1	2	0	3	irrelevant
فعلا یه پارتنر بهم بده بعد در موردش تصمیم میگیرم :)))	1	1	1	0	3	irrelevant
: ژستش تو این عکس درست شبیه ژست همسر ایندم سر میز شام دو نفرمونه [OTTER]	1	1	0	0	3	irrelevant
من جدی چندتا از دوستام تو پروسه طلاقن. مرحله شوهر و بچه رو خیلی وقته دیگه انلاک کردن.	0	1	1	0	3	relevant
[ROLLING_ON_THE_FLOOR_LAUGHING] +++ نید به شوهر شوهر شوهره شوهر قندعسله شوهر	2	1	0	1	0	relevant
تنهایی که مجبور باشم فقط قیافه شوهرمو ببینم و دورو برم تحملش کنم نمیخوام. واسه همین از صبح برنامه میچینم و دورمو شلوغ میکنم که کمترین ارتباط رو با شوهرم داشته باشم.	2	1	1	1	1	relevant
که بعد از مثلا" 5 سال دیگه شاهد یک گوینده و یک شنونده نیستیم بلکه حالا همسر کم حرف به لحاظ شنیدن و بحث های متوالی خودش میشه یکپا تیوریسین یعنی به نوعی هم شانه هم و پا به پای هم خواهند بود چه در بحث و چه در رابطه عاطفی	2	1	1	0	3	relevant
انشالله روزی برسه که بابام رانندگی کنه من و دوست دخترم اون پشت یه پارچه بندازیم رومون و چیز کنیم.	2	1	2	1	2	irrelevant
به همین دلیل که من که بچه ندارم خیلی وقتا میان زیر گوش و اروم میگن شوهرت نمیخوادت چون چاق شدی؟؟؟؟؟ خب این یعنی چی یعنی تو نخواستی هستی مناسب رابطه جنسی نیستی پس بچه هم نداری قطعا اگه جذاب بودی براش حتما رابطه داشتید و رابطه ها همه منجر به بچه میشه!! (بله همینقدر افکار پوسیدس!)	2	1	1	0	3	relevant
اینجا دخترا دلشون زن میخواد من دلم شوهر میخواد شوهر پولدار	1	1	2	0	3	irrelevant
میدونم الان نباید اینجا باشم ولی الان احساس میکنم به یکی نیاز دارم که هر شب در حد یک ربع در مورد وضعیت درسیم باهاش حرف بزنم. ترجیحا به یک خانم 18 تا 25 سال که رشتش تجربی بوده… بی زحمت اگه اینو میبنید ریت بزنید. (با مشاور ابم تو یه جوب نرفت از بس که تز بیخود میدن)	0	0	3	0	3	irrelevant
مقطع راهنمایی بودم ناظم نامه ای که برا دوست دخترم (قهر بود)نوشته بودم رو پیدا کرد [MAN_FACEPALMING_MEDIUM_LIGHT_SKIN_TONE] فکر کرد بود برا مسابقه نامه به امام زمان نوشتمش[FACE_WITH_TEARS_OF_JOY] مقام اول منطقه شدم[SMILING_FACE_WITH_SUNGLASSES]	2	0	3	0	3	irrelevant
تو کتاب علوم فصل سکس تو سوید نوشته: سیگنال هایی که نشون میده پارتنر تون موقع سکس راضی هست: 1.جواب مثبت رو با بله میده یا میگه ادامه بده 2.خودشو به شما فشار میده 3.خودش شروع میکنه لباس هاشو دربیاره 4.ناله های برانگیخته داره 5. صورتش رضایت داره 6.احساس امنیت و شادی داره [BACKHAND_INDEX_POINTING_DOWN]	0	1	2	0	3	relevant
خو شما غیر از فحاشی عیاشی دیگه کار ندارید از شما چی گیله بکار است. خواستن حقوق شما همین است که با وجود شوهر داشتن زن حق دارد که چند تا بایفریند داشته باشه شما ایتو یک حقوق میخواهید.	0	1	1	0	3	relevant
: fact: پارتنر ادم باید یجوری خوب باشه که کنارتم نشسته باشه دلت واسش تنگ باشه..	0	1	0	0	3	relevant
یه دوس پسر رشتی باید بزنم که بتونم شوهرم بکنم.	1	1	2	0	3	relevant
سلام کاوه عزیز من عیدت مبارک امیدولرم در کنار همسر و پسر عزیزت سال پر برکت و توام با سلامتی باشه براتون	0	0	3	0	3	irrelevant
اقایون بخوانند زنان وقتی مشکلی دارند، پیش از هرچیز نیازمند همدردی هستند. انان مایلند که دیگران از ریز ریز انچه انجام داده اند مطلع شوند. با همسرتان همدردی کنید.	0	1	2	0	3	relevant
اتفاقاً پرهزینه نیست به نظرم در بلندمدت. سیگنال گرفتن در مقایسه با منتظر موندن برای شناخت مستقیم فرد هزینه ی خاصی نداره. احتمال رسیدن به فرد واجد شرایط رو اگه توی دو تا حالت لحاظ کنی، حدس می زنم در بلندمدت هزینه ی انتظاری سیگنال گرفتن کمتر از هزینه ی انتظاری شناخت مستقیم باشه.	0	1	2	0	3	relevant
مثلاً من الان نباید توییت بزنم بگم که خلیج فارس مسیله هویتی است نه اختلاف نظر سیاسی! الان فقط باید بنویسم: مادرِ پدرِ نامعلوم اِبی و همسر ایشون جنده س. [UPSIDE_DOWN_FACE]	0	0	3	0	3	irrelevant
یعنی چی که شوهرش مرد خوبیه و تو نگهداری بچه بهش «کمک» میکنه؟ یعنی لطف میکنه و کاری که وظیفه ش نیست رو انجام میده؟ من راستش هیچ دلیلی برای 9 ماه عقب افتادن از زندگی و افسردگی و هزار چیز بعدش رو نمیبینم اگه هیچ امتیازی تو اون زندگی برای زن بخاطر 9 ماه از دست رفته در نظر گرفته نشه.	0	0	3	0	3	relevant
پدرسگا احتمالاً اول می خوان تو این کنسرت گذایی شون سینگل های جدید بخونن. به خدا همه رو می زنم. بدید اول من گوش کنم! ایا این خواسته ی زیادیه؟ خیر.	0	0	3	0	3	irrelevant
اموزش های خریداری شده در فرادرس صدایم می کنند و من خودم را به ان راه می زنم.	0	0	3	0	3	irrelevant
خیلی ببخشید. خیلی ببخشید. خیلی بیخود کرده شوهر میخواد. همینطوری مثل ادم زندگیتو بکن. ما مردا فقط بدیم و شما خانما همیشه خوب و همیشه هم حقتون داره پایمال میشه. اینم ماه بعد میگی	0	1	1	0	3	relevant
وای من مال پارتنرمو فر کردم الان هم کراشمه هم رلم [PENSIVE_FACE][FACE_WITH_TEARS_OF_JOY]	2	1	0	1	0	relevant
یسری از تفکرات مشخصه ی عقب افتاده بودنه. مثلا پیروزی دونستنِ ازدواج برای دخترها. ادمِ خوب پیدا کردن عالیه، بعنوان رفیق یا همسر یا هر چیزی، اون ادم خوبه پیروزیه نه فعل ازدواج یا رفیق شدن.	0	1	1	0	3	relevant
وای نه شوهر کردن اصلا ایده خوبی نیست تازه به بچه هاشونم باید عیدی بدی :))))	1	1	1	0	3	relevant
مای مشنگ، سالهای اول ازدواج با همسر سابق می رفتیم تا سیزدهم با جنگ و خونریزی اتراق می کردیم خونه مامان که بله ما خیلی خانواده دوست و عیدپرستیم. الان می گم چرا به مغزم نمی رسید با این کار ملت رو عاصی می کردیم؟ مامان چه گناهی داشت بیست وچاری مهمون داری کنه؟ همه اش اماده باش باشه؟/	2	1	1	1	1	relevant
اخه زن مومن یک روز، دو روز، سه روز، دو هفته اونجا رو قرق می کردی که چی؟ همسر سابق هم صداش در می اومد که بابا راحت نیستم بسه بریم می گفتم نه راحت باشه خونه خودته. بگذریم از اینکه تو این پروسه، بالا پایین اخلاقای خانواده به صورت اتو در مغز همسر ثبت می شد و به وقتش می زد تو سرم	2	1	1	1	1	relevant
ولی همیشه زنم اینکارو میکنه :(	2	1	1	1	1	relevant
سرصف در گرما و سرما با و خاک نایستادن دست خالی جلوی زن و بچه و همسر شرمنده نشدن. ازخجالت شبها به خانه نیامدن تا نگاه به چشمهای پر از غم فرزندان را نگاه نکند اگر زره ای شرف داشتند شب در خواب سکته میکردن دیدن فقر در یک مملکت غنی از سرمایه نوعی دهن کجی به مردمه	0	1	1	0	3	relevant
وقتی میگم خواهر کوچیک داشتن اسکل بازیه [FACE_WITH_TEARS_OF_JOY] ولش کنی میگه بیا زنم شو	0	0	3	0	3	irrelevant
هرچند هر فرد مختاره قبل ازدواج سکس داشته باشه، و البته پارتنر ایندش هم حق داره براش مهم باشه، اما این کصاخیل امارهای غلط از سوراخ هاشون در میارن. تقریبا تمام مطالعات نشون داده رابطه جنسی قبل ازدواج با شخصی غیر از همسر اینده، احتمال طلاق و عدم رضایت از ازدواج رو افزایش میده [DOWN_ARROW]	0	1	1	0	3	relevant
اگه شوهرت/زنت/پارتنرت هیچ ایرادی نداشته باشه، اتفاقا خیلی هم خوب و خوش اخلاق و همه چی تموم باشه، ولی تو دیگه از بودن کنارش لذت نبری یا به این نتیجه برسی که کنارش چیز جدیدی بهت اضافه نخواهد شد و همش تکرار و تکرار و تکراره چه می کنی؟ ادامه میدی به امید اینده ای واهی یا کات می کنی؟	0	1	1	0	3	relevant
چیزی که دوست دخترم ازم انتظار داره باشم:	2	1	2	1	2	relevant
اون کسی که یه چرت و پرتی در مورد خلیج فارس گفته چندین سال قبل همسرش رو با همسر دوست صمیمیش تعویض کرده.مشخصه که همچین ادم هوسبازی برای دیده شدن لگد به کشورخودش هم میزنه… و اصلا ارزش بحث نداره… خلیج همیشگی فارس	0	0	3	0	3	irrelevant
عجیبه با هر کدوم از به اصطلاح الیت پولدار ونک به بالا حرف می زنم، میگن تقصیر زلنسکیه، خب چرا می خواست به ناتو بپیونده! چی تو مغزتونه لعنتی ها؟ یعنی پوتین حق داره برای کشورهای دیگه تعیین تکلیف کنه و مردم اون کشورها حق دفاع از ازادی و خاک خودشون رو ندارند؟	0	0	3	0	3	irrelevant
اگه پارتنرم عکس دوتاییمونو توییت نکنه و ننویسه ماه ماله منه چی [PENSIVE_FACE]	2	1	1	1	1	relevant
وایییی فک کن ازدواج کنم و مجبور باشم علاوه بر فامیلای خودم فامیلای همسرمم دیدو بازدید کنم واسه همینه سینگلی خوبه	1	1	1	0	3	relevant
اخه نمیدونم تو که متاهلی میان دایرکت چی بهت میگن [FACE_WITH_TEARS_OF_JOY][FACE_WITH_TEARS_OF_JOY]	2	1	1	0	3	relevant
از اونجایی که میدونستم تولد همسر اقای مهدوی نزدیکه؛ میخاستم به این مناسبت یه استوری در شان ایشون بذارم و تبریک بگم. فلذا رفتم تو پیج اقای مهدوی تا شاید بتونم ایدی همسرشو پیدا کنم. اینو پیدا کردم که توش به دلایل نامعلومی پنج تا خانومو تگ کرده [FACE_WITH_TEARS_OF_JOY] الان از کجا بفهمم خانومش کدومه؟	0	0	3	0	3	irrelevant
انتحاری، حلال- نوروز، حرام مرگ، حلال - زندگی، حرام نادانی، حلال- تعلیم، حرام مرد، انسان- زن ناقص العقل کالای وطنی می پوشم، لب سیرین سرخ میزنم، گوشواره وطنی می پوشم و دلم روشن است که روز شکست سیاهی دوباره نزدیک است نوروزمبارک :)	0	0	3	0	3	irrelevant
من همیشه بچه دوست داشتم اگه بچه نمیخوای شوهر میخوای دیگه	0	1	0	0	3	relevant
+چرا ازدواج نمیکنی؟ -من: مردا، زن میگیرن. زنها، شوهر میکنن. میفهمی که چی میگم!	1	0	3	0	3	irrelevant
گیلان در این دو شبانه روزی که بهش بازگشتم جز عن چیزی نداشت. اب و هوا؟ اسفناک. ادم ها؟ ناامید کننده. حتی برای لحظاتی اینترنت به فاک رفت. همین فردا راه میفتم سمت رشت؛ دو تا رشتی گه خور رندم رو [از اینایی که کف تایم لاین، شلوارک ملت رو سر نیزه کردن] در کوچه می زنم.	0	0	3	0	3	irrelevant
یاد یکی از دوستام افتادم که به مامانش گفته پگاه داره شوهر میکنه میریم بیرون صلاح مشورت! [FACE_WITH_TEARS_OF_JOY][FACE_WITH_TEARS_OF_JOY][FACE_WITH_TEARS_OF_JOY][FACE_WITH_TEARS_OF_JOY] اون روز فهمیدم یه دو سه ماهی هست من میخوام شوهر کنم[FACE_WITH_TEARS_OF_JOY][FACE_WITH_TEARS_OF_JOY][FACE_WITH_TEARS_OF_JOY][FACE_WITH_TEARS_OF_JOY]	1	1	2	0	3	relevant
: پارتنر خوب و پیدا نمیکنن ، میسازن	0	1	0	0	3	relevant
شرایطی رو میگذرونم که هرگز برای بدترین دشمنم هم ارزو نکردم، بیکارم کردن، ماشینم موتور سوزونده، اه دربساط نیست،استرس برای همسرم سمه، بخاطرهمین یه هفتس نذاشتم چیزی متوجه شه، شب عیدم هست، منفجر میشم اخر، دارم میترکم… اینم زندگی نرمال من، لجن پراکنی میکنم من الان؟	2	1	1	1	1	relevant
میدونستم بالاخره اقامون رو پیدا میکنم، کجا بودی مرد من اگه دختر با خدایی هستی امام زمانو میشناسی نزدیک اقاییم نشو و من شر حاسد اذا حسد	1	1	0	1	0	relevant
شیوا بخدا بد نوشتیییی [FACE_WITH_TEARS_OF_JOY][FACE_WITH_TEARS_OF_JOY]خودت بخون اتفاقا بنظره من غیرتی بودن پوینته مثبت حساب میشه البته اگه طرف تعریفش از غیرت درست باشه بعد تو گفتی اگه شوهر غیرتی میخواین اون مجرده[FACE_WITHOUT_MOUTH][FACE_WITH_TEARS_OF_JOY]	0	1	0	0	3	relevant
خطرناک تر از بمب اتم عسلام است که متاسفانه تلاش کافی برای برچیدن این کثافت نمیشود عسلام مخالف هرگونه تمدن و نشاطیست اما بشدت عاشق قتل،غارت،عقب ماندگی ،کودک همسری و هر چیز زشت است کینه عسلام را با تمدن و نشاط را در کلیپ زیر ببینید نوروز ریدم تو اسلام	0	0	3	0	3	irrelevant
رقص زن فقط برای همسرش اشکال شرعی نداره سیاه بازا. ویدیوهای رقصتونو نریزید تو تایملاین، بفرستید ناشناس بنده. اها ناشناس ندارم. خب پس هیچی.	0	0	3	0	3	irrelevant
صرف نظر از میزان درامد دوست داری شغل همسر ایندت چی باشه؟	0	0	3	0	3	irrelevant
: زن و شوهرهایی که دعوا می کنن و مشکل دارن اما طلاق نمی گیرن واقعا احمقن واقعا احمقن.	0	1	1	0	3	relevant
دوست پسر چیه دیگ من دنبال شوهر میگردم [WOMAN_GETTING_MASSAGE_MEDIUM_SKIN_TONE]	1	0	3	0	3	irrelevant
چشم [FOLDED_HANDS] من خیلی مواقع شوخی توییت می زنم. توییت های قبلیمم همچین هوایی داره. ممنون از تذکرتون.	0	0	3	0	3	irrelevant
اقا یه پرانتز باز کن اگر صلاح میبینی که همسر یا دوست پسر نداشتن به یکی بدن دلش شاد شه	1	1	0	0	3	relevant
اسیدپاشی بر روی قربانی کودک همسری در جهرم؛ مردی در یکی از روستاهای شهرستان جهرم که اقدام به اسیدپاشی بر روی همسر 17 ساله خود کرده بود بازداشت شد. علاوه بر سهولت دسترسی و تهیه اسید در بازارهای ایران، نبود قوانین پیشگیرانه کافی نیز بر تداوم جرمی تحت عنوان "اسیدپاشی" موید شده است.	0	1	1	0	3	relevant
دختر داییم شوهر کرده اونجا میگه اهوازی بوده پسرو… دیگه از اهوازی ها میترسم [ANXIOUS_FACE_WITH_SWEAT] اون از اون جریان سر بریدن اینم از این اعدام دسته جمعی[NEUTRAL_FACE][NEUTRAL_FACE]	0	1	1	0	3	relevant
در انتظار افشاگری های سنگین اصلاحاتچی ها ناخن به هم می زنم [WINKING_FACE] پیش بینی	0	0	3	0	3	irrelevant
اسم شوهر دختر خالم صدارس توی این یازده سالی که دخترخالم و شوهرش با هم دارن زندگی می کنن مامان بزرگم هنوز نتونسته اسمش رو درست بگه و هنوز هم صداش می زنه اقاصدام!	0	0	3	0	3	irrelevant
در دورترین تصوراتم نمی تونم پارتنر کسی باشم که شغل خطرناکی مثل اتش نشانی داره.	1	1	1	0	3	relevant
: چرا دوست پسرم به من عیدی نداد؟ [PLEADING_FACE]	2	1	1	1	1	relevant
هم شوهر داری هم دوست پسر فاب… هزار الله اکبر تبریک میگم بت مرزهای هرزگی رو جابه جا کردی. [FACE_WITHOUT_MOUTH][FACE_WITH_TEARS_OF_JOY]	0	1	1	0	3	relevant
من شوهر میخام	1	1	2	0	3	irrelevant
در راستای ترجمه تحت لفظی زبان کردی به فارسی برای همسر این شاهکار رو خلق کردم در ترجمه "پاتَ سر چاوانم" گفتم پات توی چشمم [WOMAN_FACEPALMING] دنبال جمله قدمت روی چشم میگشتم که متاسفانه ذهنم همراهی نکرد	2	1	0	1	0	relevant
راهیان نور تجربه فوق العاده ای بود. معنویت خاص و عجیبی داشت،از طرفی فان و شوخی هم به اندازه کافی بود. بچه های کاروان ما هم خیلی مشتی بودند. فرصتی هم پیش اومد در سفر شخصیت خودم رو محک بزنم.اخر سفر شرط شرفیاب شدن مجدد، تاهل و همراهی حاج خانم قرار داده شد :)	1	1	0	1	0	relevant
شوهر یک دونشم زیاده:((( به جاش 4 تا دوست پسر برمیدارم	1	1	1	1	1	relevant
این سوال رو در افغانستان و پاکستان بپرس وووو درست. بعد اونقدر میرن توی حس که از ادمین میپرسن از پیامبر بپرس اجازه میده زنم بیاد کنیزش بشه، خودم غلامش بشم بعد اینو دیگه اونقدر دمبال میکنه تا ادمین دهنش سرویس شه. هردقیقه هم با گریه و ناله از ادمین میخواد حرفشو به پیامبر بگه [FACE_WITH_TEARS_OF_JOY]	0	0	3	0	3	irrelevant
:))))))))))))))) دیروز به زیدم عیدی دادم گفتم واسه کسکلک یه توییت شبیه همینو بزنه. سوخت توییتش. :)))))))))))))))))))	2	1	0	1	0	relevant
این زن بارها به شوهرش خیانت کرده است	0	1	1	0	3	relevant
یه لباس افسرده کننده پوشیده بودم رفتم عوضش کردم ،همسرم رفت پیتزای مورد علاقمون رو خرید و اینگونه گذشت اولین شب قرن ما	2	1	0	1	0	relevant
چه میفهمید هرکسی میبینتتون میگه ایشالله شوهر کنی یا دوستاتون برات هر نوروز تولد دعا کنن سال دیگه ایشااله شوهر کنی یعنی چی؟	1	0	3	0	3	irrelevant
به توییتی که ازش کپی کردی سر بزن تو کامنتا توضیح دادم چرا خواب زن چپه درسته از تاریخ ادبیات مثال زدم	0	0	3	0	3	irrelevant
ولی من یه روزایی خاصی دلم شوهر میخاد مثلا ایام عید که بریم کلی دور بخوریم و خوشحال باشیم [GRINNING_FACE_WITH_SWEAT][FACE_WITH_HAND_OVER_MOUTH]	1	1	0	0	3	irrelevant
فان؟تمام استارهایی که میبینم همش جنسیه!یا نود یا رقص یا کلا یه دختره یا اینکه موضوع توییت درمورد رل و اکس و سکس و نکست و پارتنر و کثافتای جنسیه. از تورم و بی مسیولیتیو افشای عنترزاده ها حرفی زده بشه اصلا توییت دیده نمیشه!نمیدونم کار دارودسته خودشونه یا مردم واقعا دارن احمق میشن!	0	0	3	0	3	irrelevant
[FACE_WITH_TEARS_OF_JOY] نه این فقط یه شوخی هست، حرصش بدم، تند تند بیاد بگه انده انده- همسر اصلیم ایشونن	2	1	2	1	2	relevant
: یک دختر وقتی میگه دوست پسر میخام یا شوهر میخام منظورش اونیه که خودش دلش میخاد نه هرکی از راه رسید و بهش پیشنهاد داد.	1	0	3	0	3	irrelevant
من از زنم فقط دوتای بالارو میخواهم	2	1	2	1	2	relevant
به نظرم ادم وقتی می خواد همسر/ پارتنر پیدا کنه باید به رفتارهای اجتماعی هم توجه کنه، کسی که تو رانندگی به قانون و حق دیگران احترام نمی ذاره، تو حرف زدن در مجامع یا همین اینترنت بی ملاحظه و بی ادبه، با همسر/ پارتنر خودش هم همین خواهد بود. بیشعوری یک خصیصه عامه و خاص یک جنبه نیست	0	1	1	0	3	relevant
جالبه همسرم هم وقتی بهش گفتم گفت اشکال نداره [UNAMUSED_FACE]	2	1	2	1	2	relevant
اینایی که گفتی مگه واسه پارتنر نباید باشه؟	0	0	3	0	3	irrelevant
بر خلاف سنتهای پلشت اسلامی و سیره زندگی محمد که به زنان با دیده رفع شهوت نگاه میکردند و به ازدواجهای متعدد افتخار میکردند، کوروش بزرگ بر شهادت منابع یک همسر داشت و به او علاقه داشت و متعهد بود هرودوت مورخ یونانی فقط از یک همسر بصورت روشن نام می برد تاریخ هرودوت، کتاب 2، بند 1	0	1	0	0	3	relevant
جایزه نوبل متعهدترین و عاشق ترین همسر روی زمین باید ایجاد و به ریچارد رتکلیف تعلق بگیره،6سال همه جوره برای ازادی همسرش جنگید،با عرض پوزش اگر مردِ ایرونی بود1ماه تلاش میکرد بعد با رفقای پیگیر همسرش وارد رابطه میشد؛چندتا هم این وسط صیغه میکرد	0	1	0	0	3	relevant
بر سر انم که گر ز دست براید دست به کاری زنم که غصه سراید [FACE_WITH_HAND_OVER_MOUTH]	0	0	3	0	3	irrelevant
فامیلمون تازه ازدواج کرده اومده خونمون گربه ها مو دیده جیغ جیغ کنان پریده بغل شوهرش میگه از گربه میترسم ، شوهرشم تو جمع گفت من که گفتم گربه دارن :)))	0	1	1	0	3	relevant
ولی همسر ادم از خدا ترسناک تره دستش هم برا مجازات باز تره	2	1	1	1	1	relevant
[ROLLING_ON_THE_FLOOR_LAUGHING][SMILING_FACE_WITH_HEART_EYES] عکس شوهر من اینجا چیکار میکنه	2	1	2	1	2	relevant
بار اخر که مست بودم صبح پا شدم دیدم یکیو همسر اینده سیو کردم تو گوشیم از واتساپ پیام داده" عزیزم کجایی اسم بچه ی سومم تو بزار" [NAUSEATED_FACE][NAUSEATED_FACE] یعنی تو این فاصله 2 تا زایید منتظر سومیش بودیم	1	0	3	0	3	irrelevant
همین که زنم گفت	2	1	2	1	2	relevant
اونوقت ها میخوندیم دمب من سه چارک عید شما مبارک سیب و درخت و پنجره عیدی من یادت نره [SMILING_FACE_WITH_HEART_EYES] امسال 100 تومن همسر داد من کادو دادم به مادرشوهر چون تولدش بود خلاصه هیچی گیرم نیومد	2	1	1	1	1	relevant
از مامانم پرسیدم مامان دختره الان 18 سالشه با دوست پسرش اومده مسافرت کی میذاری من برم با دوست پسرم؟ گفت حالا تو یکیو پیدا کن بعد. حقیقتن ریده شد بهم.	1	0	3	0	3	irrelevant
به همین شیوه زنت میدن؛)	1	0	3	0	3	irrelevant
3 بار بهزاد لیتو رو می زنم (((((:	0	0	3	0	3	irrelevant
انقدر سرکار کسخنده می زنم، برگشتن گفتن این گل میزنه چت میاد سرکار. :))))))))))))	0	0	3	0	3	irrelevant
اینا همش فازه، از سرشون میپره پشیمون میشن دو سال دیگه که خواستن پارتنر همجنسشون پیدا کنن میفهمن	0	0	3	0	3	irrelevant
جواب سوال 3: وقتی هم که واقعا به این درک رسیدی که با نفر مقابلت قراره تا اخر عمر زندگی کنی و شرایط مالی و روانی هر دو طرف مساعد بود تصمیم به بچه دار شدن گرفته میشه. این تجربه شخصی من بعد از 13 سال زندگی مشترک با همسرم هست.	2	1	0	1	0	relevant
شوهرم بده به من چه. ولی به تازه عروس و دوماد تا قرن ها هی هدیه و عیدی و اینا می دن :)))	2	1	1	1	1	relevant
شوهر داره مگه؟	0	0	3	0	3	irrelevant
اشالا روزی بچه هات خود حرومزاده ت همسر و دیگر فک و فامیل و عزیزانت باشد و اشالا این مهم بدست ما مردم صورت گیرد. تکه بزرگتون گوش بدردنخورتان خواهد بود. وجود نکبتتون هم غذای خوک.	0	0	3	0	3	irrelevant
من قطعا از همسر اینده امضای کتبی میگیرم منو از بچه هامون بیشتر دوسداشته باشه [WOMAN_WALKING_LIGHT_SKIN_TONE][DAGGER]	1	0	3	0	3	irrelevant
اصلا حالت خوشی ندارم. تقریبا همیشه یک سردرد جزیی دارم و گاهی هم قلبم درد میکنه، شبا تا خود صبح بیدارم و روزا هم نمیخوابم، چرت میزنم، حاضر بودم به جای یکی از اخوندایی که این چند روز مرد بمیرم و راحت بشم.	0	0	3	0	3	irrelevant
ولی تا وقتی این هفت تا پسرا و صداشون هستن من نه به پارتنر نه به دوست نه به هیچکس نیاز ندارم :")هیچوقت فکر نمیکردم عاشق بشم و حالا عاشق هفت نفرم که منو از عمق تاریکی و غم نجات دادن کسایی که بهم لبخند و امید هدیه دادن و تا وقتی نفس میکشم با تمام وجودم ازشون حمایت میکنم	1	1	0	1	0	relevant
بله موافقم اما نباید کار به اینجا بکشه . البته حدس می زدم مادر شوهر به خاطر کس دیگری از خانواده عذرخواهی می کرد	2	1	1	1	1	relevant
امروز دنبال یه جایی بودم که از قبل مد نظرم بود جغور بغور اسکندر و علی [SPEAK_NO_EVIL_MONKEY]با کلی ادعا که اینجا بهترینه و معروفه همسر و اون توریست انگلیسی رو کشوندم دنبال خودم[GRIMACING_FACE]هر جا هم میرفتیم میپرسیدیم کسی بلد نبود[WOMAN_FACEPALMING_MEDIUM_LIGHT_SKIN_TONE]هی از همدیگه می پرسیدن ایسکندر جغور بغوری تانیسان؟[FACE_WITH_TEARS_OF_JOY] بالاخره بعد از کلی گشتن پیدا..	0	0	3	0	3	irrelevant
مثل اینکه همسر طرف فوت نکرده بیمارستان بستریه و حالش وخیم اعلام شده قاتل هم فردی لاابالی بوده و میخواسته زمینایی که به همسرش ارث رسیده بوده رو بفروشه که همسرش میره خونه پدرش بعدشم که قاتل میره اونجا با اسلحه شکاری سه نفرشون میکشه [WOMAN_FACEPALMING]	0	0	3	0	3	irrelevant
برای من همه چی از اردیبهشت شروع میشه میخوام 01/02/03رل بزنم و 03/02/01 هم ازدواج میکنم باهاش یوهاهاها	2	1	0	1	0	relevant
دوست پسرم و به عید دیدنی و فامیلاشون بدجوری باختم عزیزان	2	1	1	1	1	relevant
من زنم نمیذاره:)))))	2	1	1	1	1	relevant
من بردم ولی مرد تو اینه مرد.	0	0	3	0	3	irrelevant
فکت: پارتنر خوب یافتنیه ولی رابطه ی خوب ساختنی	0	1	0	1	0	relevant
اقا ایشون خیلی خوب میرقصن، مورد پسند عام! ولی وقتی زن گرفتین توقع نداشته باشین زنتون رقص خوب بلد باشه :))) یهو میزنه تو ذوقتون!! [FACE_WITH_TEARS_OF_JOY]	0	1	1	0	3	relevant
ایول هروقت با دوست پسرم دعوامون شد این توییتو نشونش میدم. خودمم این وسط تخریب شدما ولی مهره سوخته حساب میشم دیگه فقط دهن اونو سرویس میکنم	2	1	1	0	1	relevant
فک کنم شوهره از این مرد زن ذلیل هاست که زنه هر شب کتکش میزنه [FACE_WITH_TEARS_OF_JOY]	0	1	1	0	3	relevant
منی که تو طول روز میرم خوش میگذرونم و شبا به این نتیجه میرسم که پارتنر میخوام [NEW_MOON_FACE][SKULL]	1	0	3	0	3	irrelevant
من از لحاظ مالی خودمم شوهر لازمم :))) اره ولی دهنشون سرویسه در کل :"))	1	0	3	0	3	irrelevant
عمه این مرد زنگ زده داره بهش می گه که این دو روز خانمت خیلی اروم و فلان نشست و برخاست کنه و استراحت کنه و… . اینا نمی دونن من تو خونه از صبح تا شب پشتک وارو می زنم =))))	2	1	0	1	0	relevant
من قرار نیس شوهر و بچه امو قد تخم سگ هم تحویل بگیرم واقعا این کارا برای من بی معنی و تهوع اوره	2	1	1	1	1	relevant
اشرف غنی، در مصاحبه ای ترک افغانستان را توجیه کرده و گفته که این کار ناگهانی اتفاق افتاد. اما رنگین دادفر اسپنتا گفته است که که ماه ها قبل نحوه تخلیه رییس جمهور، همسر و نزدیکانش تمرین شده بود: «همه چیزها ازمایش شده بودند، اینطور نبود که رییس جمهور شتاب زده ارگ را ترک کند dw	0	0	3	0	3	irrelevant
بیا بریم واست شوهر پیدا کنم	1	0	3	0	3	irrelevant
گفتین ساعت هوشمند داغ دلم تازه شد [FACE_WITH_HEAD_BANDAGE] عیدی واسه شوهرم دو تا بند رنگی واسه گارمینش خریدم اما خیلی بی کیفیت بودن… دو بار ساعت از دستش پرت شد[FACE_WITH_HEAD_BANDAGE]	2	1	2	1	2	relevant
اقا تیغو بیارید بزنم این رگو لعنتی	0	0	3	0	3	irrelevant
اسمش رد کردن مرز ها و جنده بازیه شما فرض کن دختری میاد به دوسپسر یا شوهر شما نود میده، علاوه بر مشکل داشتن شوهر و دوس پسر شما در مرحله ی اول برمیردی میگی دختره حق داره رو بدنش دلش خواست؟ نه، جنده بازیه	0	1	1	0	3	relevant
منم گهگاهی به دوست دخترم گیر میدم میگم رو چه حساب با منی؟	2	1	1	1	1	relevant
مهریه همسر شهید حججی 124 هزار صلوات و حفظ قران با معانی بود که شهید حججی موفق شده بودند نصفی از قران را با معنی حفظ کنند. روحشان شاد [BROKEN_HEART]	0	1	0	0	3	relevant
شوهر من شد اولش فقط بعد دیگه وزنش ثابت موند الان فک کنم دو ساله فستینگ داره دیگه روال عادی زندگیشه فقط جلوی افزایشش رو میگیره	2	1	2	1	2	relevant
تنهایی مهاجرت کردن خیلی سخته بعضی اوقات جوری مشکلات بهت حمله میکنن که این تنهایی از پا درت میاره یه پارتنر خوب تو مونیخ چیه؟ اونم پیدا نمیشه:))	1	1	1	0	3	irrelevant
من زن میخاممممم جدی میگما همسر :)) ازدواج:)))بچه:))زندگی مشترک [LOUDLY_CRYING_FACE][LOUDLY_CRYING_FACE][LOUDLY_CRYING_FACE]	1	0	3	0	3	irrelevant
میری به طرف میگی هوی اینکه تو باهاشی شوهر منه میگه خب منو انتخاب کرده	2	1	1	1	1	relevant
دوس دارم غلت بزنم و شوهرم جراحمو ببینم:)	2	1	0	1	0	relevant
منم خانمم و تایید میکنم تا حدودی درست میگن حتی توی اینستاگرام هم بلاگر های خانم بیشتر ری اکشن نشون میدن تا بلاگر های اقایون	2	1	0	1	0	relevant
: ولی من فقط یه پارتنر می خوام که پایه مسافرت اینجوری باشه [SMILING_FACE_WITH_TEAR]	1	0	3	0	3	irrelevant
میخواید شلوارک بپوشید نپوشید به من چه ولی بدونید خیلی زشت دیده میشید وقتی شما با شلوارک و دمپایی کنار خانمتون که شلوار و مانتو و شال داره راه میرید سراسر تضاد	0	1	1	0	3	relevant
همسر محمدی ری شهری (دختر علی مشکینی) موقع ازدواج کم تر از 11 سال سن داشته! یعنی دو تا اخوند (اولین وزیر اطلاعات و اولین رییس خبرگان) که از سال های اول انقلاب سمت داشتن همینقدر احمق بودن. بعد یه سری می گن ج ا اولش خوب بود بعد خراب شد.	0	1	1	0	3	relevant
اون روز در مورد یه موضوع صحبت میکردیم همسر تو جمع بهمه گفت به هیچکس هیچکس هیچوقت کمکی نکنید در هیچ زمینه ای مخصوصا اگر از شما واضح درخواست نکرده باشه مردم بی نهایت بد شدن و حتی کمک کردن ممکن براتون مصیبت بیاره الان امروز رفتم جایی کار اداری و کارمند گیج میزد فقط به قصد همکاری…	2	1	2	1	2	relevant
سلام رفیق عزیزم، مرسی از نظر لطفت ولی از من گذشت، این توییت ها که میزنم فقط برای پرت کردن ذهنمه، مرسی که به شعرا توجه میکنی [BOUQUET][HIBISCUS][GREEN_HEART]	0	0	3	0	3	irrelevant
تنها خواستم از دوستام اینه که شوهر کردن بلاگر نشن چون رفاقتمون به فاک میره [PENSIVE_FACE][PENSIVE_FACE]	0	0	3	0	3	irrelevant
مرد باشید برید ببینید چقد استفاده کردید زنم بودیت بودیت ساعت 12 ب بعد بروژ میشه و 0 میشه	0	0	3	0	3	irrelevant
بابا دومیه همسر من بوده احتمالا	2	1	2	1	2	relevant
خب می دونی من اولین نوه ی دخترم و اولین نفری که رفته رشته ی تجربی برای همین همه حساب باز کردن رو منه بدبخت امشب شوهر خالم داشت می گفت تا دکترا کمکش میکنم و فلان [FACE_WITH_TEARS_OF_JOY] منم داشتم سعی میکردم نزنم زیر خنده[WOMAN_WITH_WHITE_CANE][FACE_WITH_TEARS_OF_JOY][BROKEN_HEART]	0	0	3	0	3	irrelevant
کردیم عاقا چشمتون روز بد نبینه یه جای داغون و با یه صف طولانی و شلوغ:\ گفتم حتما غذاش عالیه [SPEAK_NO_EVIL_MONKEY]غذا رو هم که اوردن انقدر چرب بود که خودم هیچی نخوردم[FACE_WITH_TEARS_OF_JOY][WOMAN_FACEPALMING_MEDIUM_LIGHT_SKIN_TONE]نگم از قیافه همسر[WOMAN_FACEPALMING_MEDIUM_LIGHT_SKIN_TONE]عجیب بود همچین جایی معروف شده بود[EXPRESSIONLESS_FACE]	0	0	3	0	3	irrelevant
من مجید خزایی پول پدر پژمان خزایی پول هستم ساختمان من رو و تمامی دارایی زمین و ماشین و همه دار و ندارم را ( میتونید دیسکاوری کنید ) اینفورمشنش هست به اسم و نام همسر اینده پسرم کنید اسمشو تو ریپلای بعدی مینویسم اهمیتی به اپشن و کانتک ندین همه حسودن	1	0	3	0	3	irrelevant
اسی تو که اونروز گفتی شوهر نکردی	0	0	3	0	3	irrelevant
پنج تومن پدر شوهرم دادن چون نوه اول خانواده رو در راه دارم [GRINNING_FACE_WITH_SWEAT]	2	1	0	1	0	relevant
[CANDLE][CANDLE]مسافرت تک درخت قطع شده درک با دوست دخترم[CANDLE][CANDLE]	2	1	2	1	2	relevant
منم یا همچین روانی ای سراغ دارم ،انقدبچه هاش دوست داره که حدنداره ولی موقع خریدلباس ومایحتاجشون سخت میگیره ازاونورتاقبض برق و…خانوادش حساب میکنه بااینکه نیازی ندارن بهش ،باهاشونم گردش وخونه فامیل همسرنمیره میگه اخلاقم جورنیست باکسی،خانم بنده خداش عاشقش بودهمه کاریم کردنشدکه	2	1	1	0	3	relevant
سال نوت مبارک، سورنا ازاده، ولی شوهرت باید دوتا کمربند بزنه [BEAMING_FACE_WITH_SMILING_EYES]	0	1	2	0	3	relevant
بیمارم یه خانوم 35ساله ای هستش که به دلیل کتک خوردن از همسرش دچار ضایعه ی مغزی شده!مادرش میگفت: دخترم!شاید باور نکنی اما برای اینکه با مریم ازدواج کنه پنج سال خودش رو به اب و اتیش زد [BROKEN_HEART]	0	1	1	0	3	relevant
بهترین اتفاق 14.1 در جواب فامیل که به مامانم گفتن دخترات رو چرا شوهر نمیدی بالاخره گفت که چی بشه که زندگیشون بشه مثل شماها چیکارشون دارم خوشحال خندان دارن میگردن کدومتون الان خوشبختین [CLAPPING_HANDS_LIGHT_SKIN_TONE][CLAPPING_HANDS_LIGHT_SKIN_TONE][CLAPPING_HANDS_LIGHT_SKIN_TONE][CLAPPING_HANDS_LIGHT_SKIN_TONE][CLAPPING_HANDS_LIGHT_SKIN_TONE][CLAPPING_HANDS_LIGHT_SKIN_TONE] [WOMAN_DANCING_MEDIUM_…	1	1	1	0	3	irrelevant
با تاخیر شروع کردم به دیدن سریال dark و متوجه شدم که داماد خوشگلمون اقای پیچمن هم در این فیلم بازی می کنن. واقعاً به به به سلیقه ی پارتنرشون خانم طباطبایی.	0	0	3	0	3	irrelevant
من نمیفهمم اینکه میگین من دنبال رابطه جدی نیستم یعنی چی… یعنی بهم میگین بیا الکی زن و شوهر باشیم؟ مگه خاله بازی چش بود؟	1	0	3	0	3	irrelevant
نه ببین با این مدل ازدواجی که اینجوری بهش می گیم "شوهر کردن"، دهن من تهش با کار خونه سرویس بشه اگه طرف حیوان نباشه. خرج جهاز مهاز که با بابامه، عروسی با خانواده داماد، خرجای خونه هم که شوشو. منم یه مدت کار خونه می کنم تا جایی که باتریم تموم شه یا حامله شم بعدم خودکشی [HANDSHAKE_LIGHT_SKIN_TONE][HANDSHAKE_LIGHT_SKIN_TONE]	1	1	1	0	3	relevant
«داوش» جنسیت نداره تو میتونی دوست دخترم باشی من بازم قراره بهت داوش بگم	1	0	3	0	3	irrelevant
میگم مخاطب خاصتو اگه می خوای مجازی پیدا کنی زودتر بگرد تا قبل طرح صیانت [FACE_WITH_TEARS_OF_JOY][FACE_WITH_TEARS_OF_JOY][FACE_WITH_TEARS_OF_JOY] البته مجازی پیدا کردن همسر هم پیشنهاد نمیشه[BEAMING_FACE_WITH_SMILING_EYES][BEAMING_FACE_WITH_SMILING_EYES]	1	0	3	0	3	irrelevant
: من و زیدم شما همه [WINKING_FACE][THUMBS_UP_LIGHT_SKIN_TONE]	2	1	0	1	0	relevant
من سر کار بودم شوهرم و بچه ها سفره گذاشتن،دخترم اسباب بازی گذاشته،لیوان گذاشته،عناب…	2	1	1	1	1	relevant
می دونی شما دختراانتظار یه شوهربامحدودیت دارید اون موقع پسرا هم دودسته رایج دارن که یااز روی بی حوصلگی رل زدن یاب ای یه شاهین دارم خونه حمیرامی خونه اگه می خوای بیانشونت بدم یه دسته ی دیگم هست که خیلی محدودن دنبال زن گرفتنن [ROLLING_ON_THE_FLOOR_LAUGHING][ROLLING_ON_THE_FLOOR_LAUGHING][ROLLING_ON_THE_FLOOR_LAUGHING]	0	1	1	0	3	relevant
نامه های عاشقانه رو به همسر و فرزندم ندیدی مگه [NEUTRAL_FACE][GRINNING_FACE_WITH_SMILING_EYES][FACE_WITH_TEARS_OF_JOY][FACE_WITH_HAND_OVER_MOUTH]	2	1	0	1	0	relevant
اون زن توه که الان در زمان تویییت کردن و گوهخوریت رفته زیر برو بچ سپاهی یا عراقی ،برو بقیه گوهتو اونجا بخور…هری	0	0	3	0	3	irrelevant
درود بر شما عالی بود کار درست و بجایی میشه که برای فرزندانمون تاریخمون رو بگیم البته من بیشتر به شاهنامه علاقه دارم و چنان مهری از شاهنامه در دل همسر و اطرافیانم انداختم که الان بیشتر از من پیگیر داستانهای شیرین شاهنامه هستن	2	1	0	1	0	relevant
تا این باقلوا رو با ظرفش بکوبم تو سر شوهر خالم [FACE_WITH_TEARS_OF_JOY][WOMAN_FACEPALMING]	0	0	3	0	3	irrelevant
عزیزم قشنگ معلومه ولی دیگه مادر شوهر کاریش نمیشه کرد [ROLLING_ON_THE_FLOOR_LAUGHING][ROLLING_ON_THE_FLOOR_LAUGHING]	2	1	1	1	1	relevant
به نظر من صرفا یه پرزنتیشن مدرن تری از زنان داد که حالا مثلا با موهای کوتاه و این چیزا بود که خب احتمالا از این نظر برای گی ها جذابه.	0	0	3	0	3	irrelevant
: مهریه همسر شهید حججی 124 هزار صلوات و حفظ قران با معانی بود که شهید حججی موفق شده بودند نصفی از قران را با معنی حفظ کنند. ر…	0	1	0	0	3	relevant
علی اقا من امسال رو سال زید و دختربازی نام بردم پس زید میزنم	1	0	3	0	3	irrelevant
[RED_EXCLAMATION_MARK] کیوان عباسی در هنگامه تحصیل در اسراییل با مرجان اسکندری یهودی تبار اشنا و 2001 ازدواج کرد! [HOLLOW_RED_CIRCLE] کیوان به پیشنهاد همسرش برای دیدار با رهام هارونی از اعضای تشکیلات یهودیان ایرانی در لندن که با مرجان نسبت خویشاوندی داشت به لندن رفت تا برای حمایت از بیزینسش با انان مذاکره کند. 9	0	0	3	0	3	irrelevant
وحشیانه و غیرانسانی ؟ شما اگر ازدواج قرارداد مالی نمیدیدی مهریه تعیین نمیکردی نفقه هم نمیخواستی ثبات مالی همسرت هم برات مهم نبود اتفاقا مکالمه با شما اشتباهه تو دنیای رمانتیک و کودکانه تون غرقید	0	1	1	0	3	relevant
من ن انم ک زبونی کشم از چرخ فلک چرخ بر هم زنم ار خلف مرادم گردد [FACE_WITH_TONGUE][WINKING_FACE][SMILING_FACE_WITH_SUNGLASSES] داللللللللل	0	0	3	0	3	irrelevant
بنده هم خیلی اهل ماهی نیستم اما اگه یه وقتی یه غز ل الایی باشه دست رد به سینه ی کسی که اون رو پخته نمی زنم [GRINNING_FACE_WITH_SMILING_EYES]	0	0	3	0	3	irrelevant
دوس دارم پارتنرم سیگار بکشه ولی سیگاری نباشه	1	1	3	0	3	irrelevant
واقعیت اینه کسایی که هی پارتنر عوض میکنن قیافه شون شکسته و پیر میشه چون انرژی عشقیشونو هدر میدن سعی کنین با یه نفر باشین و اون یه نفرم متقابلا عاشق شما باشه و متقابلا بهتون انرژی عشقی بده اینطوری انرژی عشقی شمام هدر نمیره و ته چهره تون پیر و شکسته نمیشه	0	1	0	0	3	relevant
من پارتنر ندارم ولی کیس واسه صب بخیر گفتن زیاده [FACE_WITH_TEARS_OF_JOY][BROKEN_HEART]	1	0	3	0	3	irrelevant
اخه بستگی داره به چی عشوه بگی. تو اون نگاه مثلا مرد سنتی و رقص یه زن تو قهوه خونه منظورته. من اون رو در کتگوری خرکی قرار میدم :-)))	0	0	3	0	3	irrelevant
خوب اره مادر شوهر بازی هم دارن بعضیا اما در مقابل اونایی که با محبتن ناچیزه	2	1	1	1	1	relevant
101 ای اومده… تا اینجا ک چرخشی بوده و معلوم نیست تهش کی با کیومیره، البته من طرفدار این دختره ام و دو دارم تهش پسره با این باشه ولی واقعا معلوم نیس. فقط با اون مو خاکستریه ک شوهر داره میدونم بیشتر از سکس پیش نمیرن.	0	0	3	0	3	irrelevant
هراز گاهی پارتنر یا کراشتان را محترمانه به اکتشافی جدید دعوت کنید	0	0	3	0	3	irrelevant
من الان باید با محبوبم لاس میزدم نه اینکه بشینم به شوهر خالم الکی بخندم|:	1	0	3	0	3	irrelevant
با روسری هیچ زیبایی وجود نداره.نصف بیشتر زیبایی زن تو موهاشه…	0	0	3	0	3	irrelevant
اوف بر تو چرا یادنگرفتی دختره از ما کوچکتره مامانش گفته الان همه اینطور شوهر میکنن بعد ضمن حرفاش به اینکه ما مجردیم اشاره ریز کرده	1	1	1	0	3	relevant
من ک اصن توییت نمی زنم صرفا بحر تماشا اومدم [SMILING_FACE_WITH_TEAR][SMILING_FACE_WITH_TEAR][FACE_WITH_TEARS_OF_JOY][FACE_WITH_TEARS_OF_JOY]	0	0	3	0	3	irrelevant
الان که مامان شوهرت خوابیده [FACE_WITH_TEARS_OF_JOY][FACE_WITH_TEARS_OF_JOY][FACE_WITH_TEARS_OF_JOY]	0	1	2	0	3	relevant
: همسرم رفت نزدیک تلویزیون ببینه اسم سال چیه نتونست بخونه(چشمش ضعیف شده)میگه اینقدر اسم سال چرته که از خجالت ریز نوشتن [FACE_WITH_TEARS_OF_JOY][FACE_WITH_TEARS_OF_JOY]	2	1	2	1	2	relevant
فقط من موندم و یکی دو نفر دیگه همه متاهل شدن رفتن عید امسال همه با همسری هاشونن شدیدا احساس تنهایی میکنم	1	1	1	0	3	irrelevant
: این که با پارتنرت رفیق مشترک جنس مخالف داشته باشید اشکال نداره . ولی هر گونه ارتباط و رفاقتی غیر این اشکال داره اقا اشکا…	0	1	1	0	3	relevant
قیمت بستگی داره چی باشه این داره خودش رو زیر دست و پا میندازه که بعدا بیاد دق دلی شو سر خواهر و مادر شوهر خالی کنه	2	1	1	0	3	relevant
نه اون برای زن و شوهر که میگن قبلش وضو بگیر که این کار مثل عبادت است ربطی به شکستن وضو نداره	0	0	3	0	3	irrelevant
دلم میخواد برای دوست دخترم خط چشم بکشم ولی دوست دختر ندارم	1	1	1	0	3	irrelevant
چند روز پیش حدود ده زن توسط یه گروه طالبان مورد تجاوز گروهی قرار گرفت، چند تایی هم کشته شدند و بقیه فرار کردند اما اونهایی که موفق به فرار شدند توسط خانواده هاشون کشته شدند. هیچ نهاد حقوق بشری هم، اه از نهادش بر نیومد.	0	1	1	0	3	relevant
همسر دیگه	2	1	2	1	2	relevant
هایپر مارکت ها دارن، ممکنه از فروشنده ها بتونی شوهر بسازی:)))	1	0	3	0	3	irrelevant
: پارتنرم : روز افتضاحی داشتم و هیچ چیز نمیتونه حالم بهتر کنه من :	2	1	1	1	1	relevant
[RED_EXCLAMATION_MARK]شیعیان و سنی ها، فقط سه گزینه دارید! [NO_ENTRY] اول با همین رژیم ایران بسازید این ها هفته ای یکبار زنت رو می برن! [NO_ENTRY]دوم مجاهدین خلق که شیعه هستن و دو سه روز یکبار زنت رو می برن! [CHECK_MARK_BUTTON] سوم اپوزیسیون میلیونی ری استارت هست که راه نجات شماست، انتخاب با شماست 36	0	0	3	0	3	irrelevant
خاک بر سرم اصلا فکرشم زشته البته اگر شوهرم اجازه بدن میتونم برینم در اون صورت مستحبم هست	2	1	1	1	1	relevant
صبح اول فروردین که با صدای جیغ و داد و کتک کاری یه زن و شوهر تو خیابون بیدار شدیم. تا فردا چه پیش اید؟ [WOMAN_SHRUGGING]	0	1	1	0	3	relevant
یادمه قدیما که با دوست دخترم زندکی میکردم یک روز بعد کار با دوستانم رفتیم بار و کمی مشروب خوردیم خونه رسیدم ابتدا با بی محلی سخت روبرو شدم بعد هم اینکه بوی الکل میدی شب منو تو اشپزخونه خواباند خلاصه به گوه خوردن افتادم بدون اجازه ایشون اب هم نمیخوردم البته خانم محترم ایرانی نبود	2	1	1	1	1	relevant
: خدایا من بلد نیستم دل ببرم خودت بهم یه شوهر ترک بده.	1	1	2	0	3	irrelevant
می بخشید من چون شوهر نداشتم در اغوشش وایسم امسال عکس با سفره هفت سین نذاشتم ایشالا سال دیگه ژانر سفره هفت سین ناقص در غربت.	1	1	1	0	3	irrelevant
الان این مشخصاتی گفتید برای کاره یا پارتنر؟	1	0	3	0	3	irrelevant
ما دخترا بدتریم ک زرتو پرت میگن شوهر کن دیر نشه/:	1	1	2	0	3	irrelevant
بعد زنت از من عیدی میخواد [FACE_WITH_TEARS_OF_JOY][NEUTRAL_FACE][NEUTRAL_FACE] من تا الان 350[UNAMUSED_FACE]	0	0	3	0	3	irrelevant
چند نفرتون نامزدتون تو یه شهر دیگه ست و ازتون دوره؟ چند وقته عقد کردید! و چند مرتبه به دیدنش رفتید؟ ایا مسیر دور باعث شده مراسم های خاص(روز زن، عید غدیر، عید قربان، یلدا،نوروز) به دیدن همسرتون نرید؟	0	1	1	0	3	relevant
بازم گوش دادم، فقط نگفته دوست دارم، گفت «خیلی دوست دارم، مراقب خودت باش» اه قلبم [PLEADING_FACE] ای زن تو چه خوبی، هم باسوادی هم مهربونی	2	1	0	1	0	relevant
طرف اومد درمانگاه،گفت واسه خانمم یه عکس بنویس درد بدن هست [NEUTRAL_FACE] گفتم خب بگین تشریف بیارن من ببینم مشکلشون چیه بعد نیاز بود عکسم مینویسم[SMILING_FACE_WITH_SMILING_EYES] گفت شما یه عکس بلد نیستی بنویسی؟ عکس رو بنویس فردا میارمش[ANGRY_FACE] گفتم اقا جان من از چی عکس بنویسم باید بدونم مشکل چیه[TIRED_FACE] <<<<ادامه	0	0	3	0	3	irrelevant
با این دخترا ک بهمدیگه میگن لاوم همسرم دوست میشدم نودبازی میکردیم	1	0	3	0	3	irrelevant
اره این ساید قضیه که بشه زن گرفتن هم این شکلیه که کل هزینه های عروسی رو خانوادم باید بده، دهنم با شغل و خرجای خونه سرویس میشه. بعد از یه مدتم یا پولم ته میکشه و زنم طلاق میگیره و مهریه رو میذاره اجرا یا حامله میشه و خودکشی [HANDSHAKE][HANDSHAKE] کی با خانواده مزاحم شم حالا؟	1	1	1	0	3	relevant
چه ربطی دارهههههه شوهر نکردم که هنوز	1	0	3	0	3	irrelevant
یعنی هم زمان که پدرانی هستند که سر دختراشون رو لب باغچه می ذارن، شوهرهایی که کتک می زنن و می کشن، مردهایی که حق کار و تحصیل رو از زنان خانواده می گیرن، دقیقا در همین زمان، بزرگترین دغدغه فمینیست های مملکت ما «تبدیل یار به غار»ـه.	0	1	1	0	3	relevant
شوهرم بره باهاش دعوا کنه؟ منم به شوهرم نگفتم درباره حرفایی که پشتم میزنه	2	1	1	1	1	relevant
اااا بابا شوهر کن دیگه هست تو دوتا بچه داره	0	0	3	0	3	irrelevant
همسر قهرمان قیام ابان98 علی فتوحی در سرما و برف اردبیل بر سر مزار همسرش حاضر شده و چنین نوشته است: عهد بسته بودیم سال تحویل کنار هم باشیم . من به عهد خود با تو پایبندم عزیزم من کنارتو ام و تو در کنار من یک سال هم تموم شد و تقویممان عوض شد نوروز	0	1	0	0	3	relevant
ببین کاراتو تباه خانم نبودی که امروز مختو بزنم بعد تاریخشو تتو کنیم 01/01/01	1	0	3	0	3	irrelevant
عزیزم تو الان خودت شوهری	0	0	3	0	3	irrelevant
برا فانم بگی کارما داره این کلمه! شوهر گیرت نمیاد یه بار دیگه این کلمه رو بگی! :))))))	1	0	3	0	3	irrelevant
یکی از هزاران دلیلی که نباید شوهر مهشید بود	2	1	1	0	3	relevant
بعنوان پارتنر خیلی وحشیم ولی بعنوان رفیق خیلی پایه تم [GEM_STONE]	2	1	1	1	1	relevant
*داشتم کنسرت گاتسون میدیدم عمم گفت خدا شفات بده [NEUTRAL_FACE] بعد گفت بجا این دری وریا برو سفره رو جمع کن منم گفتم من درحال شفا پیدا کردنم نمیتونم* مقصرش خودتی زن من سرم تو کون کسی نبوده و نیست got7	1	0	3	0	3	irrelevant
: همینطور که تو عکس واضحه این خانم منتظر تصمیم شماست پس لطفا عجله کنید!	0	0	3	0	3	irrelevant
اون که فقط یه مرحله شه، کیونای ما همه چی تمومه خواهرجان [SMILING_FACE_WITH_HEART_EYES] فقط اینکه از بس خوش بر و رویه هرجا میره شوهر واسه خودش پیدا میکنه[FACE_WITH_TEARS_OF_JOY] superjunior	1	0	3	0	3	irrelevant
چرا دوست پسرم به من عیدی نداد؟ [PLEADING_FACE]	2	1	1	1	1	relevant
یه کم توییت خوب بزنین، به من نگا کنین ببینین چقدر فاخز و با زیبا توییت می زنم	0	0	3	0	3	irrelevant
خواهرم 3 ماه پیش زایمان کرد. قرار بود طبیعی باشه اما لحظه اخر عملش کردن. اونم خیلی میترسید. اما دکترش ارومش کرد و قانع شد که زایمان طبیعی داشته باشه.نمیدونم چی بهش گفته. اما میدونم دیگه نه مثل قدیم خطرناکه نه اونطوری عذاب اور. یجوری تلاش میکنم قانع شی انگار قراره زن من بشی [FACE_WITH_TEARS_OF_JOY][GRINNING_FACE_WITH_SWEAT]	1	0	3	0	3	irrelevant
مگ حامله شدن از طرف شوهر نبود؟ [NEUTRAL_FACE]	0	0	3	0	3	irrelevant
واقعا میگی؟شوهر غیرت نداره؟؟؟؟باید سرشو ببره بنداز تو همون توالت.	0	1	1	0	3	relevant
این چه جمله ی مسخره ایه که میگید عملیات تبدیل دوست پسر به شوهر فالور به شوهر کراش به شوهر یعنی کلا گیر تبدیل پسرا به شوهرید؟	1	0	3	0	3	irrelevant
شب باباش اومد در خونه م. گف شما زنگ زدی؟ گفتم اره. گف مگه تو وکیل مردمی؟ گفتم اره بخاطر اینده بچه ت که فردا دزد و جانی و روانی عقده ای نشه با این حجم ازار! می دونی وقتی سر کاری، زنت چه بلایی سر طفلک میاره؟ ببین یارو! بازم صدای جیغ بچه بیاد بازم زنگ می زنم! دیگه تموم شد! 2/2	0	0	3	0	3	irrelevant
: دلم خیلی شوهر میخاد	1	0	3	0	3	irrelevant
چون پارتنر ندارم. نمیشه [EXPRESSIONLESS_FACE]	1	1	1	1	1	irrelevant
[FACE_WITH_TEARS_OF_JOY][FACE_WITH_TEARS_OF_JOY][FACE_WITH_TEARS_OF_JOY][FACE_WITH_TEARS_OF_JOY]من فکر میکردم اشتباه تایپی بود شوهر کرده هیچی نذاشته، بعد ادامه رو هم اونطور که اصلاح کردم خوندم (کرد)[FACE_WITH_TEARS_OF_JOY][FACE_WITH_TEARS_OF_JOY]باز از اول خوندم[FACE_WITH_TEARS_OF_JOY]	0	0	3	0	3	irrelevant
گلم همه حرف میزنم خیلیهام گه میخورن شما بخور تا ماها ببینیم میمیری یا نه	0	0	3	0	3	irrelevant
میخام برم کوه داد بزنم من زن میخاممم	1	1	1	1	1	irrelevant
: مامانم میگه اگه فلانی شوهرش مرده پس چرا تو پیجش هیچی نذاشته؟! چی بذاره خب مادر من . بچه ها امروز شوهرم مرد، لایک و کامنت یادت…	0	0	3	0	3	irrelevant
تکست دادم دختره رو دعوت کردم واسه تولدم میگه با دوست پسرم بیام؟ خب دوست عزیز اگه پسرا هم بودن من تو متنم مینوشتم دیگه! چه سوالیهههههههههه!!	1	0	3	0	3	irrelevant
رسانه های اوکراینی گزارش می دهند که همسر کوتویتسکی، نماینده سابق مجلس نمایندگان، تلاش کرده است تا 28 میلیون دلار و 1.3 میلیون یورو را از طریق زاکارپاتیا از اوکراین خارج کند!	0	0	3	0	3	irrelevant
یدونه بهترش بگو بزارم دوست داشته باشی همسر	2	1	2	1	2	relevant
90% افرادی ک اسمشون ارزو عه و اسم شوهر یا دوست پسرشون امیده بدونین اسم در اولویت و ارجح تر نسبت به همه چی بوده واسشون . امیدو ارزو. ولی ترکییب. قشنگیه::))	0	1	0	0	3	relevant
از دیروز دارم خودمو قانع می کنم که چون غذاهای مامانم خیلی خوشمزه اس، پس اشکالی نداره من خیلی غذا بخورم و گردالی بشم، در واقع دارم خودمو گول می زنم. [PLEADING_FACE]	0	0	3	0	3	irrelevant
شوهر بهاره رهنما به بهاره میگه رفتم از بابات میمون بگیرم تو رو انداخت بهم	0	0	3	0	3	irrelevant
بچه ها جون معرفی میکنم نیلوفر دوست دخترم هستن	2	1	2	1	2	relevant
اقا یکی از دوستام دوست پسرش خیلی از خودش بزرگتره در حد شوگر ددی اینا،ما رفتیم دیدمش الحق که جذاب بود و چقدر پایه و خوب ،من یک اشاره کردم دلم سفر میخواد وقت نیست تور 2روزه برامون میخواد بچینه با ون خصوصی بریم کویر ،مرسی مرد من سالهاست میخوام برم وقت نمیشه	1	1	0	0	3	relevant
دخترای خوشگل،منشن بدید تا از بین شماها یه نفرو به عنوان همسر ایندم انتخاب کنم	1	1	2	0	3	irrelevant
وااا تو چطوری پارتنر انتخاب میکنی؟ اونم همینجوری	0	0	3	0	3	irrelevant
نه فامیل فک میکنن دارم با دوست پسرم چت میکنم حرف درمیارن [BROKEN_HEART]	1	0	3	0	3	irrelevant
سال گذشته زنم ترک کردم امسال میخام دنیا رو ترک کنم	1	1	1	1	1	relevant
وخداوند مرد راافرید دید میلرزد ، به او لباس داد دید گرسنه است ، به او غذا داد و در انتها زمانی که دید مخلوق خود هیچ مشکلی ندارد ، به او همسر داد [SMILING_FACE][SMILING_FACE][SMILING_FACE]	0	0	3	0	3	irrelevant
همسر من اذری تباره خدابیامرز پدرش بست با دعای خیر و اشک و نان و برنج و نمک داماد رو نمک گیر میکنن به رسم پذیرش در خانواده مثل فرزند پسری تازه…	2	1	0	1	0	relevant
ولی تو زن منی میدونستی؟ [FACE_WITH_TEARS_OF_JOY]	2	1	2	1	2	relevant
حتی وقتی پشت فرمونمم معذب میشم اگه بززگ جمع بره عقب بشینه بعد میاین سر اینکه مادر شوهر جلو بشینه یا عقب دعوا می کنین!؟	2	1	1	0	3	relevant
کسی که برا شوهر هیچی نمیدوزه	0	0	3	0	3	irrelevant
همسرم به تازگی این عکس را از اسمان شب گرفت: شعاع نور ماه روی ابرها، و به گونه ای عجیب بزرگ. به خودمان گفتیم بیاییم پایان سال و سده جاری را، مانند همین صحنه تصور کنیم: صحنه تاریکی مه الودی که در دوردست ان، نوری نافذ پیداست. نوروز	2	1	0	1	0	relevant
: چقدر این تصویر برای ما اشناست. همسر و مادر جانبازان ما یک عمر چنین به پای همسر و فرزندانشان ایستادند…	0	1	0	0	3	relevant
نه [FACE_WITH_TEARS_OF_JOY] دخترش شوهر کرد پسرش هم زن داد البته زور… زوری بچه هاش رو فرستاد سر خونه زندگیشون اونها هم چقدر جنگ و دعوا داشتند سر این مسیله… الان باهم زیاد خوب نیستند	0	1	1	0	3	relevant
حالا میتونه گاهگاهی با اجازه شوهر و پدر اجابت مزاج داشته باشد ولی مستحب موکّد هست که مستراحش مستقیم به چاهی که به اب روان متصل هست باشد.و همچنین استفاده از مستراح غربی و فرنگی حرام هست .زیرا ما هر چه میکِشیم از این بی عفتی هاییست که غرب برای زنان ما به ارمغان اورده.	0	0	3	0	3	irrelevant
پارتنرم:	2	1	2	1	2	relevant
خیلی دوست داشتم در این تعطیلات به گند و گه های درون گراییم برسم. ولی متاسفانه تعطیلات عید همسر برونگرام هم هست	2	1	1	1	1	relevant
من یه پارتنر در بلاد کفر دارم… که خیلی اهل احساس نیستن… ولی اونم اینو درک میکنه و میفهه… واقعا محبت جواب میده رو خانوما	2	1	0	1	0	relevant
فکر کنم به این معتقدن که پشت سر هر مردی یه زن هست و احتمالا ابی رو عروسکی در دستان مهشید میبینن ولی بنظرم ابی خودش یه شخص بالغه و در مرحله بعد شوهر مهشید	0	1	0	0	3	relevant
یه کم توییت خوب بزنین، به من نگا کنین، ببینین چقدر فاخر و با زیبا توییت می زنم	0	0	3	0	3	irrelevant
بله دستشویی نیاز طبیعی انسان هست اما باید پاسخ به این نیاز باید در چارچوب خانواده و توالتِ خونه شوهر باشه. برای همین، قبل از ترکیدن روده ها باید شرایط ازدواج جوانها رو فراهم کرد	0	1	2	0	3	relevant
: هردفعه میرم تیک تاک از شدت پارتنر نداشتن میخوام خود زنی کنم	0	0	3	0	3	irrelevant
چه می خواد کارفرما باشه چه انتخاب پارتنر باشه به نظر من سنجش اعتماد با توجه به رفتار فرد انقدر پرهزینه نیست. موضوع سر تصور من و تو از ریسک سیگنال ها و هزینه ی سنجش رفتاریه که به نظرم دیگه باید سر موضوع خاص بحث کنیم.	0	1	0	0	3	relevant
چقدر دلم میخواست یه پارتنر ثابت داشتم الان باهاش چَت میکردم [PENSIVE_FACE][PENSIVE_FACE][PENSIVE_FACE]	1	1	1	0	3	irrelevant
دوستان دوس پسر نمیخام اگه راست میگین خاطرخاهین بیاین خاستگاری شوهر شین.	1	1	1	0	3	irrelevant
دوستام یکی از یکی خوشگلتر بابا خب زیدم شید جدی:(	1	1	0	0	3	irrelevant
رابطه رو باید قدم به قدم جلو ببرید و از همه چیز مهتر باید تمام سعیتون رو بکنید که پارتنرتون رو بشناسید. یکی از مهترین نیاز خانمها دیده شدن و شنیده شدن هست حتما باید این حس رو از شما بگیرن وگرنه کمبودش رو کس دیگه ای پر میکنه. حس خاص و ویژه بودن کلید قلب خانمها است. ادامه دارد..	0	1	0	0	3	relevant
به این میگن هفت سین… صفر تا صدش رو خانمم درست کرده خودش مزین به عکس سردار عزیزمان [BROKEN_HEART][BROKEN_HEART]	2	1	0	1	0	relevant
گاهی ازجبر زمـان پا ننهـم روی اصـول از درفلسفه چــون واردمنطـق شده ام وقت اگـر پا بـدهد بر دهن غصه زنم بسکه بی حوصله از اینه ای دق شده ام گرچه هر ثانیه ام را گذراندم به سکوت نتوان گفت که بی زمزمه ناطق شده ام من که روی لب بانـو عسـل زل زده ام عاشــق صنعــت نقــاشی خالق شده ام	0	0	3	0	3	irrelevant
من همه رو دوست دارم نمی تونم انتخاب کنم همون چند همسری قبوله [FACE_WITH_TEARS_OF_JOY]	0	1	0	1	0	relevant
من شوهرم رو دست اری شیا نمیدم [FACE_WITH_DIAGONAL_MOUTH]	2	1	2	1	2	relevant
رابطه فایده نداره، چون هیچوقت اونجوری که باید نیست، الان مثلا در همین لحظه من دلم زن میخواست که برم توی بغلش، زید به چه درد میخوره وقتی توی خونه باباشه؟! یکی باید باشه که همیشه کنار دستت باشه، و این شخص هم زن، همسر انسان هست.	1	1	1	1	1	relevant
میخواستم بگم کص ننت دلیلی ندارم فقط کص ننت راستی کس زنت بلاکت میکنم	0	0	3	0	3	irrelevant
رو زن من چت نباش عععع دورو زمونه عوض شده بمولا بددوو برو خونتون	2	1	1	1	1	relevant
نه والا من که همش توییت میزنم دوست دختر میخوام. کی توییت زدم دارم؟ [FACE_WITH_TEARS_OF_JOY][FACE_WITH_TEARS_OF_JOY][FACE_WITH_TEARS_OF_JOY]	1	1	0	0	3	irrelevant
دو روز بیا بین سنی ها تا بفهمی قضیه چیه [ROLLING_ON_THE_FLOOR_LAUGHING][ROLLING_ON_THE_FLOOR_LAUGHING][ROLLING_ON_THE_FLOOR_LAUGHING]البته اگه زنده بیرون اومدی و برای بیرون شدن ات از منطقه ،محرم شرعی و شوهر لازم نبود[ROLLING_ON_THE_FLOOR_LAUGHING]	0	0	3	0	3	irrelevant
حالا… اینم مطمینا از خاطرات اقای همسر هست وگرنه خودت که سربازی نرفتی [FACE_WITH_TEARS_OF_JOY][FACE_WITH_TEARS_OF_JOY][FACE_WITH_TEARS_OF_JOY]	0	0	3	0	3	irrelevant
مشکل اینه متاسفانه من فقط تا جایی بلدم که بشم پسرا بشن رفیقم دیگه بلد نیستم بکنمش دوست پسرم [GRINNING_FACE_WITH_SWEAT]	1	1	1	0	3	irrelevant
listening to bts butter for best selling song of 2021 by bts خونه تنهااام دلم میخاد دوست دخترمو بیارم خونه ولی میدونید که دوست دختر ندارم	1	1	1	0	3	irrelevant
بیزحمت بگو یه دوست دخترم برا من بیاره سر راهش [SMILING_FACE_WITH_TEAR][PERSON_IN_MANUAL_WHEELCHAIR_LIGHT_SKIN_TONE]	2	1	2	1	2	relevant
من پارتنرم توی توییتر بود این تایم که با هم بودیم [SEE_NO_EVIL_MONKEY][FACE_WITH_TEARS_OF_JOY] خیلی خیلی سخت بود و نمیشد راحت غر زد یا غیبتشو کرد [FACE_WITH_TEARS_OF_JOY]	2	1	1	1	1	relevant
من درست متوجه شدم؟ یه مرد برای فرار از کاستی های زندگی مشترک با همسرش به یه همدم پناه ببره؟	0	1	1	0	3	relevant
به کوری چشم دشمنان دوست پسرم کصخلتم عزیزم [SPARKLES][PENSIVE_FACE]	2	1	2	1	2	relevant
من در حالِ «به خدا نمیخوام شوهر کنم و زوده برام عزیزم» گویان به فامیل.	1	1	1	0	3	irrelevant
قبول کن و بله رو بگو توی این بی شوهری [LOUDLY_CRYING_FACE]	0	1	2	0	3	irrelevant
اینم امارمیدانی امروز 1 از همسران سوال کردم کجا و چطور با هم اشنا شدن ناگفته نماند که برخی از همسران فعلی و عاشقان قبل از ازدواج میگن درحال حاضر عشق و احترام متقابل دریافت نمیکنن 1- در یک محله زندگی میکردیم 2- خواروبار فروشی داشتم که ایشون رو دیدم 3- هم دانشگاهی بودیم	0	1	1	0	3	relevant
: سپیده فرهان: در بازجویی شرایطی مانند بازجویی همسر سعید امامی را تجربه کردم خبرگاه	0	0	3	0	3	irrelevant
اگه پارتنر مورد علاقمو پیدا کنم باهاش برم تو رابطه،دیگه پیدام نمیشه بی حاشیه میچسبم به ارامش واقعا مغزم خستس [PERSON_WALKING]	1	1	2	0	3	irrelevant
دوتا از خواهرانم در المان میزبان دو خانواده اکراین ی جنگ زده شده اند شاید تجربه تلخ جنگ در خوزستان و اوارگی ما حس بیشتری از همذات پنداری و همدردی رو ایجاد میکنه یکیشون مرد ایرانی و همسرش اکراینی ولی دیگری هردو اکراینی هستند جالبه اینها رو خودشون پیدا کردند .	0	0	3	0	3	irrelevant
شایدم قراره من از شوهر اولم جدا شم با تو عروسی کنم [FACE_WITH_TEARS_OF_JOY]	2	1	1	1	1	relevant
اون دیگه دوس پسر نیس که اون شوهرِ [BEAMING_FACE_WITH_SMILING_EYES]	0	1	2	1	2	relevant
[CANDLE][CANDLE]مسافرت هرمز با دوست پسرم[CANDLE][CANDLE]	2	1	2	1	2	relevant
مگه میخوام با الکسیس ازدواج یا رل بزنم؟	1	0	3	0	3	irrelevant
دیگه وقت شوهر کردنته! [FACE_WITH_TEARS_OF_JOY] [FACE_WITH_TEARS_OF_JOY]	0	1	0	0	3	irrelevant
من رفته بودم نونوایی وحشتناک صف مردونه شلوغ بودولی سمت خانوماکسی نبودنوبت من بود داشتم نون جمع میکردم.یه مردسیبیل کلفت لاتی ازراه رسیدو اومداول چندتازرمفت زدو گفت اقا نون بدین من برم من زنم نون بدین من.نونا رو جمع کردم دادم بهش گفتم ایناروبگیر بروفقط سیبلاتو بزن.نونوایی رفت هوا [ROLLING_ON_THE_FLOOR_LAUGHING]	0	0	3	0	3	irrelevant
الان اولین دعوای قرن جدید رو با همسرم کردم .. در حالی که دو روز پیش قول داده بودیم تو سال جدید و قرن جدید دعوا نکنیم دیگه [BEAMING_FACE_WITH_SMILING_EYES] همینقدر وفادار [FACE_WITH_TEARS_OF_JOY] عید نوروز	2	1	1	1	1	relevant
هزینشو پرداخت کن خانمم بعدش در خدمتتون هستم	0	0	3	0	3	irrelevant
دلم میخواد لپ لپ بخرم ولی نمیدونم کجا میشه پیدا کرد… یکی از اون بزرگاش… شاید به شوهر توش بود [FROWNING_FACE]	1	1	1	0	3	irrelevant
باتوجه به رویکرد توییتر توی دی اکتیو کردن، می شه حدس زد اگه دختر بود، از اونایی می شد که اگه تا یک مدت بعد قهر نری سراغشون از سر لج شوهر می کنن.	0	0	3	0	3	irrelevant
ریتوییت رو چرا بستی مرد؟! من میخوام ریت بزنم [CONFUSED_FACE]	0	0	3	0	3	irrelevant
نه من منتظر شوهر میمونم [PENSIVE_FACE]	1	1	0	0	3	irrelevant
تو این دوره قحطی شوهر	1	1	1	0	3	irrelevant
نشده چون قراره زن من بشه [SLIGHTLY_FROWNING_FACE][UMBRELLA_ON_GROUND][PALM_TREE]	1	1	2	0	3	irrelevant
اونوقت فردا میای اسکرین میزاری که وای دوست پسرم گعته با دوستای دیگه ی پسرت قطع رابطه کن عزیزم هیچکس خوشش نمیاد دوست دخترش به هرکی رسید نود بده یا اگه دختره دوست پسرش از هر دختری رسید نود بگیر منم دوست پسرم همچین دوستِ دختری داشته باشه دلم نمیخواد باهاش در ارتباط باشه هرزه ها [UNAMUSED_FACE][UNAMUSED_FACE]	1	1	1	0	3	irrelevant
سوزان مستروس همسر دوم پمپیو در دیدار با یک فرد ایرانی از او خواسته پیغامی را به مقامات تصمیم گیر در ایران برساند تا در تصمیم خود برای انتقام از پمپیو تجدیدنظر کنند. این روزنامه نوشته که همسر پمپیو با عجز و لابه به طرف ایرانی گفته است: «از زمانی که دولت ترامپ تمام شده 4/1	0	0	3	0	3	irrelevant
من یه قرمه سبزیم یاد بگیرم وقت شوهرم فرا میرسه [MOAI]	1	0	3	0	3	irrelevant
این احمق خودشو کشته انگلیسی بشه، شوهر انگلیسی، خیانت به وطن، اخرش باز هم تو یه خارجی هستی.	0	0	3	0	3	irrelevant
چون کسی نمی خواد بچه ش زن مردمو جلو شوهرش جر بده	0	1	2	0	3	irrelevant
بسیار کار زیبایی کردن مادر محترم. اما شما از اون دختر بترس. زنت دهنتو سرویس میکنه به خاطر همچین جاری ای [ROLLING_ON_THE_FLOOR_LAUGHING]	0	1	1	0	3	relevant
راستش من هم دیشب به همسرم گفتم یعنی یه عده میرن پول میدن که برن کنسرت ایشون؟ [GRINNING_FACE_WITH_SWEAT][FLUSHED_FACE][WOMAN_FACEPALMING]	2	1	2	1	2	relevant
ایه 223 سوره بقره این بدترین مثالی بود که می تونستین بزنید این ایه در ردِ تحریف قوم یهود پیرامون نوع رابطه جنسی زن و شوهر دارد. زن، نه کالاست و نه منشا تاریکی، بلکه او بنیان گذار ابادی ها و سرمایه گذار تاریخ انسانی است. «نِساوُکُمْ حَرْثٌ لَکُمْ، قَدِّمُوا لِاَنْفُسِکُمْ»	0	0	3	0	3	irrelevant
الان اولین دعوای قرن جدید رو با همسرم کردم .. در حالی که دو روز پیش قول داده بودیم تو سال جدید و قرن جدید دعوا نکنیم دیگه [BEAMING_FACE_WITH_SMILING_EYES] همینقدر وفادار [FACE_WITH_TEARS_OF_JOY] نوروز	2	1	1	1	1	relevant
خانواده فعلی یعنی همسرم ؟ صد در صد خانواده ای که توش بزرگ شدم… چی بگم راضی ام به قسمت .	2	1	1	1	1	relevant
فعلا یه شوهر واس تو پیدا کنه	0	0	3	0	3	irrelevant
خونه با خونه فرق داره توی خونه ی شوهر نریدن اما تو خونه ی خود ادم ریدن	1	0	3	0	3	irrelevant
خانواده همسر ب جهنم ؛ من نمیخام زنم و خودم اینطوری نباشیم [SMILING_FACE_WITH_TEAR]	2	1	1	1	1	relevant
: زن کنکله فعلا تو این شرایط اقتصادی فقط شوهر هم کفو جوابه [FACE_WITH_TEARS_OF_JOY][FACE_WITH_TEARS_OF_JOY][FACE_WITH_TEARS_OF_JOY]	1	1	0	0	3	irrelevant
مرحله بعدی شوهر خارج روعه بعدش که دیدی ابی از کسی گرم نمیشه میزی زبان میخونی [FACE_WITH_TEARS_OF_JOY]	1	0	3	0	3	irrelevant
تو عید شوهرت دادن ؟؟	0	1	1	0	3	irrelevant
این یه سیوال روانشناسی بود و ابر(یعنی پارتنر/همسر).. [SMILING_FACE_WITH_TEAR][PINCHING_HAND]	0	1	2	0	3	relevant
قاضی: کسی را دیده اید با یک مرد ازدواج کند؟ برشت: بله! قاضی: چه کسی؟ برشت: همسر من… او با یک مرد ازدواج کرده است. قطعه ای از متن محاکمه برتولت برشت	0	1	0	0	3	relevant
همسر عزیزم عیدت مبارک جات خیلی کنارم خالیه دلتنگتم…	2	1	0	1	0	relevant
حسادت رو هر چیزی درست نیست رو چیز های مهم مثل همسر و اینا باید حسود بود	0	1	0	0	3	relevant
تا اونجایی که میدونم انیس الدوله بعد از جیران، سوگلی و همسر ناصرالدین شاه شده	0	0	3	0	3	irrelevant
خب متاسفانه یکم کامنتارو دیدم متوجه شدم با چند همسری بیشتر کنار میام [FACE_WITH_TEARS_OF_JOY][SMILING_FACE]	0	1	0	1	0	relevant
هماری پنجاب میں جب کسی خاتون کا شوهر فوت هوجاتا هی تو اُس کو رنڈی کها جاتا هی - شهباز گِل تحریک انصاف والی اجاییں اِس کو ڈیفینڈ کرنی، شاباش۔	0	0	3	0	3	irrelevant
قصد ایشان این است که اینطور نشان دهد این بانوی زیبا شوهر کرده اند تا طرفدارانشان ریزش کنند حسادت نمایان است	0	1	1	0	3	relevant
الان پسرکم تو ماشین خوابیده و من به هوای خواب بودنش، نشستم تو ماشین. همسر و پسرم، رفته خونه خاله مادرشوهرم عیددیدنی .	2	1	2	1	2	relevant
من خیلی بچه بودم، وسط حال خوابیده بودم بیدار شدم دیدم دورم مهمونه هنوز یادش می افتم پنیک می زنم	0	0	3	0	3	irrelevant
ای بابا شوهر خوب پیدا نمیشه که	1	1	1	0	3	irrelevant
نگو که شوهر میخوای	0	1	2	0	3	irrelevant
وقتی در انتخابات شوهر و خانواده شوهر خوش شانس باشی	2	1	0	1	0	relevant
من مطمینم به زنم جایزه میدهم	2	1	0	1	0	relevant
دارم وارد مرحله "هرچی میشه بذار بشه اصلا. من برنامم مشخصه" شدم. الان شوهر میخوام :))	1	1	2	0	3	irrelevant
جیغ نزن دیگه نمی زنم [ANGRY_FACE]	0	0	3	0	3	irrelevant
بعدش هم زنت با یه بقچه که توش نون تازه و کتلت و سبزیه بیاد	0	1	0	1	0	relevant
دلم ی شوهر مهربون و خانواده دوست و پر فامیل میخواد. از اونا که کل فامیل دوسش دارن و تو همه ی جمع ها همش حواسشون بهش هست… وای قربونش برم اقامونو [STAR_STRUCK]	1	1	2	0	3	irrelevant
خوش به سعادت من که زنم اونه [FULL_MOON_FACE]	2	1	0	1	0	relevant
امروز این سومین حلقه س [WOMAN_DANCING][GRINNING_FACE_WITH_SWEAT] دیگه غر نمی زنم که توی حلقه ها نیستم.	0	0	3	0	3	irrelevant
: چون کسی نمی خواد بچه ش زن مردمو جلو شوهرش جر بده	0	1	2	0	3	irrelevant
: زندگی بقیه << زندگی ما برای شام سوسیس سرخ میکردم زنگ زدم به همسرم که اومدنی نون هم بیار گفت خانوم من تو راه شمالم جمعه میب…	2	1	0	1	0	relevant
این چه مَرَضیه که با گرفتن همسر دوم درمان میشه؟ [NEUTRAL_FACE]	0	1	1	0	3	relevant
باید میگفتید؛ مگه شوهر تو پشیمون شده ، تو خودت مثال نقضی [PLEADING_FACE][FACE_WITH_TEARS_OF_JOY]	0	1	2	0	3	relevant
میتونیم بجای مقاله، به صورت مبسوط تر توی یه کتاب شرح بدیم با این حال بنظرم قسمت دومش ینی «بررسی چرایی اهمیت تولد همسر اقای مهدوی» اضافه اس چون همه میدونن چرا و چقدر مهمه. هر چند بودنش خالی از لطف نیست اما صرفا توضیح واضحاته	0	0	3	0	3	irrelevant
من افتخار میکنم که اذیتش نمیکنم،البته این که دوست دخترم ندارم بی تاثیر نیست [BROKEN_HEART][FACE_WITH_TEARS_OF_JOY]	1	1	2	0	3	irrelevant
توی اینستا به پدر دوست پسرم تبریک عید گفتم. امیدوارم زندم بذاره :))))))	2	1	1	1	1	relevant
از همون کودکی تا همین الان تصورم از شوهر یکی که شخصیتش مثل اراگورن داخل ارباب حلقه باشه، بود. [PINCHED_FINGERS_LIGHT_SKIN_TONE][EXPRESSIONLESS_FACE][FACE_WITH_TEARS_OF_JOY]	1	1	2	0	3	irrelevant
هروقت خواستن از رحم خواهر و مادر و زن تو برای زایمان استفاده کنن بیا و گوه خوری کن	0	0	3	0	3	irrelevant
پس یک عدد پارتنر واست پیدا کنه	0	1	2	0	3	irrelevant
دیشب تو چند کوچه پایین تر یه زنرو کتک میزد شوهرش اونم از مردم کمک میخواست مردم نجاتش دادن به زن ظلم میشه البته بعضی زن ها شرف یه خونوادرو به باد میدن نمیدونم چی بگم	0	1	1	0	3	relevant
دایی فرهاد زن بگیری زنت سرخ کردن بلده نه تو روغنی میشی نه اون البته به عنوان تشکر میتونی ظرفارو شما بشوری :))))	0	1	0	0	3	relevant
سیکس پک چیه؟ پارتنر باید بخور باشه که وقتی رفتی رستوران قشنگ غذا به گوشت تنت بچسبه [SMILING_FACE_WITH_HEART_EYES]همرمانم بخندونتت نه اینکه مدام تو رژیم باشه(البته من خاک بر سر همیشه رژیمم[SMILING_FACE_WITH_TEAR][PLEADING_FACE][LOUDLY_CRYING_FACE] )	0	1	2	0	3	relevant
خانم ها از لحاظ روانشاسی تکاملی تک همسر هستن ولی مردها نه یکی از علت ها شک در نسب هست اگر یک مرد چندتا زن داشته باشه نسب ها معلوم هست ولی اگر یک زن چندتا شوهر داشته باشه نسب ها گم می شه!	0	1	2	0	3	relevant
: یکی مهراب قاسم خانی از زن شانس نیاورد یکی هم شوهر کتایون ریاحی	0	1	1	0	3	relevant
اینایی که تولد بچه 4ساله شونو استوری میکنن و بهش تبریک میگن، مخاطبشون ماییم [FACE_VOMITING] من نمیدونم چرا ملت توقع دارن تولد همسر و بچه شونو ما حفظ کنیم هی تبریک بگیم ازون بدتر سالگرداشونه[PERSON_FACEPALMING] اونیکه باید ازش توقع تبریک و هدیه داشته باشی همسرته نه فامیلت که یابو	0	1	1	0	3	relevant
: من واقعا از نطر روحی نیاز به پارتنر دارم ولی اصلا راضی نیستم یکی دیگه رو تو بدبختیام شریک کنم	1	1	2	0	3	irrelevant
مانع تحصیل دختران نشوید گروه جهل اگر دختر تو اگاه شد یک فامیل اگاه داری و فردا داکتر خواهد شد تا زن تو بد بخت و بی دین را معاینه کند	0	0	3	0	3	irrelevant
ورژن جدید بابک تقوایی، مجهز به موشک انداز ضد پهلوی میتونستی از مریم رجوی و شوهر معدوم شده اش مثال بیاری، برازنده تر بود، البته اگر خط قرمزتون نباشه !	0	0	3	0	3	irrelevant
میزان تنفرم از این پرنک های اینستاگرام بی پایان، حل نشدنی و خشم اوره… مخصوصا وقتی پرنک بین زن و شوهره و باعث می شه زن یا شوهر مذبوح و بیچاره با سر گِل، رنگ، خامه و… مالیده شده به دوربین نگاه کنه و قربون پارتنرش بره برای این شوخی بامزه ش :)))))	0	1	1	0	3	relevant
: چرا سینگلم پارت n ام : بین 32درصد دنبال پارتنر میگردم	1	0	3	0	3	irrelevant
مامان بزرگ من امروز داشت زنم می داد. به مامانم گفتم بیا نجاتم بده، اونم همراهی کرد باهاش، تهش خاله بزرگم نجاتم داد وگرنه یه عروسی افتاده بودین	1	1	2	0	3	irrelevant
افرین یکی بیاد این و به زن و شوهر 54 ساله یاد بده ابرو نزاشتن تو فامیل و درو همسایه [EXPRESSIONLESS_FACE][EXPRESSIONLESS_FACE]	0	1	1	0	3	relevant
این همه مدت با زوجین مختلفی برخورد داشتم، پای صحبتشون نشستم و فکر میکنم تا اینجا اگه بخوام توصیه ای اول به خودم و بعد به شما بکنم اینکه: حرف بزنید، حتی اگه فکر میکنید اون چیزی که تو ذهنتونه تاریک تر از اونه که بشه دربارش صحبت کرد، با همسرتون، پارتنرتون دربارش حرف بزنید ونترسید .	0	1	0	0	3	relevant
چرا هرکی میاد تو اتاقم و عکس پسرا رو میبینه فکر میکنه من قطعا دلم میخاد شوهرم کره ای باشه یا اینکه تنها هدفم رفتن به کره است؟ خب وات دا فاک:/	1	1	1	0	3	irrelevant
پارتنر من یه قیافه ای میگیره که یعنی خیلی اروم میری وحوصلم سر رفت [FACE_WITH_HEAD_BANDAGE]	2	1	1	1	1	relevant
اگه هیچوقت یه پارتنر گربه نداشته باشم چی	1	1	1	0	3	irrelevant
شوهرِ بالقوه رو با نود دادن میپرونید.	1	0	3	0	3	irrelevant
که چی یاد بده ؟! تکرر شوهر ؟! [ROLLING_ON_THE_FLOOR_LAUGHING][ROLLING_ON_THE_FLOOR_LAUGHING]	0	1	1	0	3	relevant
: حضور همسر و فرزندان معلم زندانی اسماعیل عبدی و فعالان صنفی معلمان در لحظه تحویل سال در جلوی ندامتگاه مرکزی کرج https://…	0	0	3	0	3	irrelevant
دقیقاااا خودش همش داش بندری میرفت اون وسط دوس داشتم بکشمش جالبه ک همه هم داشتن زن و شوهری میرقصیدن):	2	1	1	1	1	relevant
من نمیقام شوهر کنم	1	1	1	0	3	irrelevant
400 کلی غذا پختن یاد گرفتم زنم با دامن گل گلی رو بدید من برم مشغول اشپزیم شم [SMILING_FACE_WITH_TEAR]	1	0	3	0	3	irrelevant
شهبازگل صاحب کو کویی بتایی که جس عورت کا شوهر زنده هو اور اس کی باوجود وه کسی نمبردار سی عشق معشوقی کا کهیل کهیلی تو ایسی عورت کو رنڈی کها جاتا هی.. [PENSIVE_FACE][PENSIVE_FACE][PENSIVE_FACE][PENSIVE_FACE]	0	0	3	0	3	irrelevant
بیا این پولو [DOLLAR_BANKNOTE] بگیر دیگه عکس زن منه پخش نکن[FACE_WITH_RAISED_EYEBROW]	2	1	1	1	1	relevant
: چی تو اب و هوای بهار میریزن که ادم همش دلش شوهر میخواد…	1	1	2	0	3	irrelevant
من اطلاعات زیادی راجع به زایمان ندارم، اما چجوری میشه مرد فریاد بکشه زن تو اب رودخونه فارغ بشه؟ خاتون	0	0	3	0	3	irrelevant
امروز من در راستای اثبات حرفم گفتم اقااااااااااااا من در استانه ی نیم قرنم ، پس لطف کنید دستورات و افاضات تون را برای خودتون نگه دارین ، چون با عقل ناقص خودم ، در همین حد می تونم از پس خودم بر بیام ، پس لطفا بگذارین حرف بزنم و تصمیم بگیرم اونم برای دختر خودم	2	0	3	0	3	irrelevant
من میگییییرم خجالت چیه وقت شوهر کردنمم نیست [RELIEVED_FACE][RAISING_HANDS_LIGHT_SKIN_TONE]	1	1	2	0	3	irrelevant
اینقد گفتن میله ساییدن بخدا اقا من نمیزنم بارفیکس قدم 170کافیه [FACE_WITH_TEARS_OF_JOY][FACE_WITH_TEARS_OF_JOY][FACE_WITH_TEARS_OF_JOY][FACE_WITH_TEARS_OF_JOY][BROKEN_HEART]	0	0	3	0	3	irrelevant
خیلی از نظر مالی کم میاری ولی میگذره یه روزایی حتی هزار تومنی هم واسم نمیمونه ولی خوب زودگذره خوبیاش اینه کسی بهت کاری نداره بدی هاش اینه مشکلاتتو باید به تنهایی حل کنی خیلی تو چالش میری ولی قوی باش خیلی قوی تنهایی زندگی کردن کار هر کسی نیس مخصوصا اگه پارتنر نداشته باشی	0	0	3	0	3	irrelevant
*محققان دریافته اند زنانی که میگویند فرزندانشان را بیشتر از شوهرشان دوست دارند دروغ میگویند* *زیرا زنها میتوانند فرزندانشان را یک روز تمام پیش زن همسایه بگذارند ولی شوهرشان را حتی یک دقیقه پیش زن همسایه نمیگذارند.* [ROLLING_ON_THE_FLOOR_LAUGHING][ROLLING_ON_THE_FLOOR_LAUGHING][ROLLING_ON_THE_FLOOR_LAUGHING][ROLLING_ON_THE_FLOOR_LAUGHING][WINKING_FACE_WITH_TONGUE] پیشاپیش روز مرد مبارک	0	1	2	0	3	relevant
دقیقا الان داشت میگفت همه چیِ شوهرم مال منه [FACE_WITH_TEARS_OF_JOY]	0	1	2	0	3	relevant
وای اقا من 6 ماه پیش یه همچین رنگی خریدم و هنوز که هنوزه نرفتم بزنم :))))))) دیگه لازم شد واقعا d:	0	0	3	0	3	irrelevant
نازنین زاغری که اخیراً از زندان رژیم ازاد شد در کنفرانس مطبوعاتی در لندن: عدالت در ایران معنایی ندارد.همان دو،سه هفته اول در زندان به من گفتند که تا وقتی انگلیسی ها چیزی را که می خواهیم ندهند،ازادت نمی کنیم همسر نازنین زاغری:رژیم ایران باز هم از شیوه گروگانگیری استفاده می کند	0	0	3	0	3	irrelevant
شوهر با کراش فرق داره	0	1	2	0	3	relevant
بدون غلو میگم ابی یکی از رذل ترین موجوداته، وقتی این زنیکه شوهر داشت ابی با او رابطه برقرار کرد این زن را حامله کرد شوهر بدبختش فکر میکرد بچه خودشه تا گندش در امد ابی زن و سه دخترش را در امریکا که تازه هم امده بودند رها کرد و با این زنیکه هرزه ازدواج کرد این ادم وطنفروش نمیشه ؟	0	1	1	0	3	relevant
نوش جانتون خانم بنده علی الحساب ناگزیر از صبوری هستم؛ اما در فرصت مقتضی جبران خواهم کرد :))	0	0	3	0	3	irrelevant
من دوست دخترم باید باهام ملایم باشی	2	1	1	1	1	relevant
خوب زده تو ذوقش اصن حیف نیست تو شوهر کنی [PLEADING_FACE]	0	0	3	0	3	irrelevant
الهی بگردم میگه من یکم پیر شدم عذر خواهی میکنم مرد تو بهترینی	2	1	0	1	0	relevant
من دوست دخترم-	2	1	2	1	2	relevant
بنده شوهر دارم اقای محترم	2	1	2	1	2	relevant
من همین رو میگم مخصوصا کسایی که اطلاعاتی هستند ممکنه همسر و فرزندشون هم ندونن شغل واقعی طرف چیه	0	1	1	0	3	relevant
: انقدر که همسرم تو تعطیلات میگه ناهار و شام چی داریم ؟، تا اخر تعطیلات رییسی صداش میکنم . [CONFUSED_FACE]	2	1	1	1	1	relevant
اگه یروزی زنم بگه بین ایران و (درهم/دلار) یکی رو انتخاب کن حتما روی اون زن [CROSS_MARK] میزنم تمامیت ارضی خط قرمز ماست خلیج همیشگی فارس	2	1	2	1	2	relevant
بیا شوهر من شو	1	1	2	0	3	irrelevant
این چ دعایی بود اخه پس ! میگفتی خدایا دوست پسرم را به جاده ی تبدیل به شوهر شدن هدایت فرما ! [ROLLING_ON_THE_FLOOR_LAUGHING][ROLLING_ON_THE_FLOOR_LAUGHING][ROLLING_ON_THE_FLOOR_LAUGHING]	2	1	2	0	3	relevant
مهدی عزیزم سال نو مبارک [RED_HEART] برای تو، همسر گرامیت و پسر گلت ارزوی سالی سرشار از بهروزی و موفقیت دارم [CHERRY_BLOSSOM]	0	1	2	0	3	relevant
اون زمان که شما رو شوهرانتون تربیت میکردندو جایگاهتون فقط اشپزخونه و شستن گوه بچه بود دیگه گذشته،میدونم به من شدیدا حسادت میکنی شما پیر شدی و زندگی ننگینت زیر یوق شوهرت و کتک های شوهرت و سپس تربیت های حسینی گذشته،همیشه زیر پرچمی بودی امثال شما به نظارت و تربیت همیشگی نیاز دارید	0	1	1	0	3	relevant
چرا پیرزن های فامیل تو این عیدی به فکر شوهر کردن من نیستن ی استین بالا بزنن بی غیرتا	1	1	1	0	3	irrelevant
من رل میزنم سپس افسردگی میگرن و درنهایت برا بعدی گوشی میخرم… دور باطلی که ازش متنفرم و برای همین به زن ستیزی افتخار میکنم.	2	1	1	1	1	relevant
اقای رییسی پس این شوهر ما چی شد ؟	1	1	2	0	3	irrelevant
بابا من تو دوس پسر شانس ندارم، تو فک کن دوس پسره بشه شوهر، بدبخت میشم که [WOMAN_FACEPALMING_LIGHT_SKIN_TONE]	2	1	1	1	1	relevant
اگه یه روزی ازدواج کنم یکی از شوطم زایمان سزارینه که اقای همسر هرطور شده باید جورش کنه	1	1	2	0	3	irrelevant
زکات ده بانو بر اینهمه حُسن و جمال پاشم برم یه تخته پیدا کنم بزنم به تخته	2	1	0	1	0	relevant
: لطفا اگه بادوست بدبختتون رفتید بیرون و پارتنر بی خاصیتتونم اومد جلو اون دوستتون جفت گیری نکنین	1	1	1	0	3	relevant
رفتیم سفر، بخاریا و ابگرمکن روشن نمی موند، سگ لرز زدیم، برگشتیم. ضیط ماشین کار نمی کرد [ZANY_FACE][PERSON_GESTURING_OK] تمام راه خوندم ای بهار ای اسمون عیده می رم به خونه مون داد می زنم ای جان ای جان دارم می رم به تهرون دارم می رم به تهرون!	0	0	3	0	3	irrelevant
نه گلم خیلی واقعی هستم ، میشه گفت از کاربرهای واقعی هستم ، میتونی سرچ کنی والا از صبح دارید فحش میدید جواب ندادم میخواستم برایت بزنم که با یه جاج از خجالت همه درمیومدم گلممممم	0	0	3	0	3	irrelevant
اون از اجیلام که داره تموم میشه اینم از شوهرم که تیزراش نمیاد این زندگی دیگه بدرد نمیخوره	2	1	1	1	1	relevant
با عرض شرمندگی. اسکرین گوشیم امروز صبح سوخت. فکر کنم بعد تعطیلات بتونم درست کنم و جوابتون رو بدم. با گوشی همسرم این توییت رو نوشتم. فعلا خداحافظ	2	1	2	1	2	relevant
منتظرم شوهرم و هر شیش تا بچه هام بخوابن، پاشم برای خودم ته چین درست کنم.	2	1	1	1	1	relevant
ببخشید شما میخواین از ایران شوهر بیارین؟	0	1	1	0	3	irrelevant
نه پارتنر اگه پارتنر باشه همچین کاری نمیکنه . نه که به قول دوستمون گه میخوره . نه اینجوری نیست .	0	1	1	0	3	relevant
[ROLLING_ON_THE_FLOOR_LAUGHING][ROLLING_ON_THE_FLOOR_LAUGHING][ROLLING_ON_THE_FLOOR_LAUGHING] یه چند بار هم گفت دختر مایه ابروریزیه ،هر چه زودتر در سن کم شوهر بدین که باعث فساد نشه!!!	0	1	1	0	3	relevant
بیا پایین سرمون درد گرف چ ربطی داره؟! بخاطر اینه مهشید جوونتره و همسر ابیه و جای کمک ب ابی وقتی میارنش تو برنامه ها میگن چرا ابی میخونه میگه گه خوریش به هیچکی نیومده	0	0	3	0	3	irrelevant
دکمه ی بلاک رو بزن منم خوشحال کن پس به تو چه من چی می نویسم یه بار دیگه سر رای گیری اومدی زیر پست بچه ها چرت و پرت گفتی گفتی بیکار نیستی هیچی بهت نگفتیم الان گیر دادی به من؟؟؟ هرچی دلم بخواد توییت میزنم هرچی عشقم بکشه می نویسم به توام ربطی نداره ناراحتی بلاک کن	0	0	3	0	3	irrelevant
چلا اخه دلتون نمیاد من شوهر کنم عروس بشم [PLEADING_FACE]	1	1	2	0	3	irrelevant
اینا میگن زن ملکه ست شوهر باید در اختیارش باشه البته بعضیاشونم هستن که مرده خونه دا ی میکنه زنه کارمیکنه خرج خانواده شوهره رو هم میده اینکه همه چیو مادی میبینن با روحیه ماها یه کم مغایره ،خصوصا که به استقلال زن و برابزی زن ومرد اعتقادداشته باشی .نمیتونی باهاشون کنار بیای	0	1	1	0	3	relevant
اگه یه روزی ازدواج کنم یکی از شروطم زایمان سزارینه که اقای همسر هرطور شده باید جورش کنه [FACE_WITH_ROLLING_EYES]	1	1	2	0	3	irrelevant
اگر منو جاج کنید مشکلی ندارم ولی درباره همسرم اگر اجازه براتون مهمه خیر :)	2	1	0	1	0	relevant
به یک پارتنر پایه کوه رفتن، دویدن و کمپینگ شدیدا نیازمندم :))	1	0	3	0	3	irrelevant
1 اقا چند شب قبل از عید یک بزرگواری از همین دهکده توییتر از طریق ناشناس اومد تلگرام بنده و کلی راجع به توییت هایی که می زنم تعریف و تمجید کرد که حال خوبی بهش می ده و بعد از یکم چت کردن ای دی توییتر و تلگرامش رو داد که بریم توی شناس چت بکنیم.	0	0	3	0	3	irrelevant
رز عزیز و زیبا، حرف من در مورد همسر اینده حرف معلمهای دینی نیست. من حرفم در مورد این هست که عکس نود خودت رو در یک فضای پابلیک متنشر کنی. اونهم زمانی که نه کارت پورنوگرافی هست نه سودی ازش میبری خواهش میکنم یک بار خودت راجع بهش منطقی فکر کن.	0	1	1	0	3	relevant
میخوای واست پیدا کنم ی شوهر؟	0	1	2	0	3	irrelevant
اگر شوهرم روز عروسی کتش رو نده بپوشم چی!؟ [PLEADING_FACE][FACE_WITH_ROLLING_EYES]	2	1	1	1	1	relevant
از لحاظ روحی به یه شوهر پولدار نیاز دارم مگه من چمه این همه ادم شوهر پولدار گیرشون میاد چرا گیر من نیاد مگه من خار دارم	1	1	1	0	3	irrelevant
به این فکر کن که من با سه تا مرد تو تاکسی بودم [FACE_WITH_TEARS_OF_JOY][FACE_WITH_TEARS_OF_JOY][FACE_WITH_TEARS_OF_JOY]	0	0	3	0	3	irrelevant
نههههه ندارمممممممممم شوهرممممم ندارممممم دست رو دلم گذاشتی [BROKEN_HEART][FACE_WITH_TEARS_OF_JOY]	1	1	1	0	3	irrelevant
همه می خوان در سال جدید دوست و همسر پیدا کنند. بشتابید زیر این توییت نخ بدید به همدیگه. و سوزن بگیرید.	0	1	2	0	3	irrelevant
من دوست دارم هر موقع میرم بیرون دوست پارتنر و همه کسایی که باهاشون حال میکنم رو همزمان داشته باشم	2	1	0	1	0	relevant
اما یک چیز بسیار خاص و شگفت انگیز بود؛ چیزی که تا به حال مانند ان را ندیده بود. همسر ان مرد عصبانی به او یک مجسمه بتمن از جنس طلا هدیه داده بود. به محض دیدن مجسمه چشمان اراد برقی زد. یک دفعه صدای نوتیفیکیشن گوشی مهراد امد. یکی از دوستانش برای او کلیپی فرستاده بود.	0	1	2	0	3	relevant
شوهر نازنین زاغری تو کنفرانس خبری به شوخی گفته در حال مذاکره برای یافتن راهی به بازگشت به رختخواب زناشوییه [WOMAN_FACEPALMING_LIGHT_SKIN_TONE][FACE_WITH_TEARS_OF_JOY][ROLLING_ON_THE_FLOOR_LAUGHING] poor guy	0	0	3	0	3	irrelevant
همسر چرا دکترت باید اجازه بده الان دکترا سخت میگیرن	0	0	3	0	3	irrelevant
من همسر یک نظامی هستم که این حقوق و مزایا واسه شماها پول ی روزتونه! ولی اونا با جون و دل دارند امنیت امثال شماها رو حفظ می کنند! اون موقع که 3 ماه یکبار همسرامون رو نمیبینیم شما تا نیمه شب تو همین جاها برای محبوبای دروغینتون پست میذارین	2	1	1	1	1	relevant
یه گاوش همسایه پایینی ماست امروز سگش پارس کردن خانمم از ترس تو راه پله خورد زمین…	2	1	2	1	2	relevant
خودشون ساکن تهرانن ولی خونه مامانش شهرستانه، رفتن پسر دو ساله ش رو گذاشتن پیش مامانش و با همسر جان اومدن یه روز کامل تهران گردی [STAR_STRUCK]	0	1	2	0	3	relevant
وقتی میگه دوست پسرم فوتبالیسته [FACE_WITH_TEARS_OF_JOY][FACE_WITH_TEARS_OF_JOY]	2	1	2	0	3	relevant
برنامم برای 03/03/03 شوهر کردنه. ببینید کِی گفتم	1	1	0	0	3	irrelevant
ماشالا الان دوتا همسر دارم ینی؟ [LOUDLY_CRYING_FACE][FACE_WITH_TEARS_OF_JOY][WHITE_HEART]	2	1	0	1	0	relevant
من چقد به مادر شوهرم خندیدم! گفتم این بنده خداها اهل برنج نیستن نمی دونن چطور باید برنج خورد [ANXIOUS_FACE_WITH_SWEAT][ANXIOUS_FACE_WITH_SWEAT][ANXIOUS_FACE_WITH_SWEAT]	2	1	2	1	2	relevant
مگه غصه نمیخورید که دوستتون با شوهرش رفته مسافرت شما هم ازدواج کنید	0	1	1	0	3	relevant
دوستم می گفت یه بار اومدم خونه دیدم زنم داره نماز میخونه از پُشت سِفت و تنگ بغلش کردم. بعد رفتم اشپزخونه دیدم زنم نشسته! [FEARFUL_FACE]نگو اونیکه مورد تجاوز واقع شده مادرزن بوده[GRIMACING_FACE]	2	1	2	1	2	relevant
لابد خدا براشون چند تا همسر در نظر گرفته (طبیعتا پسند نکرده)	0	1	1	0	3	relevant
تو شوهر داری دیگه، بسه بقیه رو بذار برا ما:)	1	1	1	0	3	irrelevant
کاینات یه پارتنر این کرایم بهم بدهکاره.	1	1	1	0	3	irrelevant
من می خوام فقط تو خونه باشم با گربه مو همسرم ، تف تو عید و مهمونی ، تففففففففففف	2	1	0	1	0	relevant
از 25 سال رسیدید به یک قرن ؟!؟! [FACE_WITH_TEARS_OF_JOY][FACE_WITH_TEARS_OF_JOY][FACE_WITH_TEARS_OF_JOY] دوماً از شوهر ننه تون پوتین اجازه گرفتید ؟؟؟ چون امنیت اسراییل خط قرمزشه…	0	0	3	0	3	irrelevant
منم یه حدس هایی می زنم… ولی خدا به خیر کنه [PALMS_UP_TOGETHER]	0	0	3	0	3	irrelevant
ما هم به پارتنر هامون میگیم دوست دارم مثل یه ابجی	2	1	0	1	0	relevant
به من؟! زن من خودم هنو تو سن عیدی گرفتنم.. چی میگی؟ [PENSIVE_FACE][CROSSED_FINGERS]	0	0	3	0	3	irrelevant
این مدل کامنتارو کیا میزارن؟ برخی از دخترای 11 تا 17 ساله وطنم که به عشق سوگنگ اومدن توییتر و یوتوبرای کراش وطنم را شوهر اینده خود میدانند و چشم به روی همچی بستن، هرچی اون فرد بگه(سوگنگ، فرشاد سایلنت و مهرشاد)درسته و بقیه گوه میخورن پ ن: با اون یوتوبرا کاری ندارم فناشون تاکسیکن	0	0	3	0	3	irrelevant
دوست پسر من نه قد بلنده نه هیکلیه نه سیکس پک داره نه ماشین انچنایی و گوشی انچنانی داره نه هرشب تو این مهمونی و اون برنامس ولی یه طوری کنارمه که حس میکنم یه دنیا پشتمه و از هیچی نمیترسم.. همین برام بسه	2	1	0	1	0	relevant
زن باید گاز بگیره ,فرار کنه بره زیر تخت بره بالا پشت بوم بزنه تو باقر شوهرش ساق فریبرز رو بشکنه ولی بذاره سرتو بذاری رو تپه ها حسابی زار بزنی [LOUDLY_CRYING_FACE][LOUDLY_CRYING_FACE]	0	1	0	0	3	relevant
اون شوهرت ظاهرا پسته هارو ریخته تو جیبش میخوان انتقام بگیرن	0	0	3	0	3	irrelevant
50 می گیرم زنگ می زنم می گم بچه رو اجاقه. :))	0	0	3	0	3	irrelevant
علت شفای مادر شوهر غیبت کردن از فامیل های شوهر با خود شوهر	2	1	2	1	2	relevant
طرف ملاکش واسه انتخاب همسر این بود دختر خانم واکسن نزده باشه [ROLLING_ON_THE_FLOOR_LAUGHING][ROLLING_ON_THE_FLOOR_LAUGHING][ROLLING_ON_THE_FLOOR_LAUGHING][ROLLING_ON_THE_FLOOR_LAUGHING]	0	0	3	0	3	irrelevant
ولی هیشکی با دیدن شاتِ عیدی های میلیونی همسرتون به ازدواج ترغیب نمیشه!	0	1	1	0	3	relevant
زن میخوای؟ بیا من زنت میشم [FACE_WITH_TEARS_OF_JOY][FACE_WITH_TEARS_OF_JOY]	1	1	2	0	3	irrelevant
حضور همسر و فرزندان معلم زندانی اسماعیل عبدی و فعالان صنفی معلم در لحظه تحویل سال در جلوی ندامتگاه مرکزی کرج گزارش این حضور را در ادامه بخوانید: [BACKHAND_INDEX_POINTING_DOWN]	0	0	3	0	3	irrelevant
منظورم خانم،همسر ایندم بود،نه اینکه بیام با تو حرف بزنم [NEUTRAL_FACE]	1	1	2	0	3	irrelevant
شوهر ما رو هم بدید ما بریم	1	1	2	0	3	irrelevant
درست میفرمایند. موتور سواری برای زن تحقیر امیز است. شان زن مسلمان، همان که حتی روی شتر هم باید برای شوهرش اماده باشد.	0	1	1	0	3	relevant
من هم مثل هر کسی، عمق تاریکی دارم که از گفته شدن سر باز می زنم	0	0	3	0	3	irrelevant
: برنامم برای 03/03/03 شوهر کردنه. ببینید کِی گفتم	1	1	0	0	3	irrelevant
: اون خانمم لطفا از عکسم حذف کنید	0	0	3	0	3	irrelevant
بمونی خودم با دسته جارو میزنمت! این از من!!! همسر بنده ک فکر میکنه امسال داری میری !!!	2	1	2	1	2	relevant
در حد فیو و منشن بودم. دختر خوبی شدم و کمتر حرف می زنم. :)	0	0	3	0	3	irrelevant
یاد ی فیلم خارجی قدیمی افتادم یکی ازش پرسید چطور با هم اشنا شدید گفتم رفتم وسط روستا گفتم کی حاضره ریسک کنه با من ازدواج کنه زنم دستشو بلند کرده گفته من [FACE_WITH_TEARS_OF_JOY] حالا شما وایستا یکی ریسک کنه اینجا	0	0	3	0	3	irrelevant
اگه شوهر کردمو هر وقت خواستم منو نبرد حموم چی؟؟؟ یکی از انگیزه هام برا ازدواج اینکه یکی بی منت و مشتاق!منو ببره حموم و بشوره [FACE_WITH_TEARS_OF_JOY][FACE_WITH_TEARS_OF_JOY][FACE_WITH_TEARS_OF_JOY]	1	1	1	0	3	irrelevant
الان یادم افتاد سر دور بازی این بچه هی به من میگفت بازیگر مرد تو فیلم "گوزن ها" هی میگفتم بابا من "گاو" رو دیدم خیلیم دوست داشتم ولی اسم بازیگرش یادم نیست. چهار، پنج بار! :))	0	0	3	0	3	irrelevant
جر ولی خانواده ی قشنگیه همسر قشنگم	2	1	0	1	0	relevant
همسر بیشتر از شما به این کار رغبت داره	2	1	2	1	2	relevant
امسال اگه شوهر نکنم.. سال بعد زن میگیرم :/	1	1	1	0	3	irrelevant
4 سال پیش اخرین دوست دخترم	2	1	2	1	2	relevant
از من می پرسی، هیچ کس حوصله یار و همسر نداره. اصلا حوصله خودشونم ندارن. اه. اصلا این چه توییتی بود زدی [FACE_WITH_TEARS_OF_JOY]	0	1	1	0	3	relevant
مگه تو متاهلی؟ [FACE_WITH_ROLLING_EYES]	0	1	2	0	3	relevant
کافیه خواهر کوچیکم یه عکس از پسرا تو گوشیم ببینه داد بزنه عهههه شوهرت	1	0	3	0	3	irrelevant
ارههه من خودم اونموقعه که پارتنرم بود تتو داشت پیرسینگ سپتوم هم زده بود ولی در اورد گوشواره هم داشت :))	2	1	2	1	2	relevant
همسر جان قبل از تحویل سال تبدیل به نیمروشون کرد [GRINNING_FACE][GRINNING_FACE_WITH_BIG_EYES]	2	1	0	1	0	relevant
قهرمان تو خواهرت و زنت هستند که در مشهد با 5 تا عراقی سکس گروهی میکنند که در فیلم نمایان است. عراقی ها به قاسم سلیمانی و تو می گویند : این هدیه خمینی به عراقی هاست	0	0	3	0	3	irrelevant
نمیشه یادمون باشه ولی بچه نداشته باشیم اصن شوهر نداشته باشیم [FACE_WITH_TEARS_OF_JOY][FACE_WITH_TEARS_OF_JOY]	1	0	3	0	3	irrelevant
به لطف تو زرت و زرت دختران سرزمینم دارن قر میدن و میزارن مجازی… [ROLLING_ON_THE_FLOOR_LAUGHING] به امید شوهر دادن همتون بلکه یکم اوضاع اروم شه [ROLLING_ON_THE_FLOOR_LAUGHING][ROLLING_ON_THE_FLOOR_LAUGHING][ROLLING_ON_THE_FLOOR_LAUGHING][ROLLING_ON_THE_FLOOR_LAUGHING][ROLLING_ON_THE_FLOOR_LAUGHING]	0	1	2	0	3	irrelevant
من یه زن دایی دارم یه تنه تو نیم ساعت یه فامیل بهم ریخت داییم همیشه میگه من میدونم تقصیر زنمه اما چیکارش کنم مامان بچه هامه نمیتونم طلاقش بدم اما با همه قطع رابطه میکنم که دیگه فتنه درست نکنه… رفت و امد زنش با کل فامیل قطع کرده بعد شما میگید یه مرد بالغ تشخیص نمیده!؟	0	1	1	0	3	relevant
بهش می گفتی اگه ندیدی زنت، دخترت، عروست، گربه های ماده حیاتتون و هرچی موجود مونث تو خونتون هستن و پریود نمیشن بدون که همشون حامله شدن.	0	1	2	0	3	relevant
شاید عبارت " زنان علیه زنان" عبارت درستی نباشه اما تو همین تایم کمی که به اینجا سر میزنم بیشترین فیس شیمینگ و بادی شیمینگ و از طرف خانوما میبینم امیدوارم نسلتون منقرض شه راحت زندگی کنیم	0	0	3	0	3	irrelevant
یجور میگی انگار همه پسرا میتونن رو گزینه شوهر مهشید بودن تیک بزنن !	0	0	3	0	3	irrelevant
عالیه. یبار در حین شام خوردن پارتنرم گفت نمیتونم چیزی بخورم. منم فهمیدم منظورشو و همونجا یکار کردم بعدش بشینه شامشو بخوره	2	1	1	1	1	relevant
: صدای بزن و برقص پدر شوهرم اینا از پشت در میومد… تا من رفتم تو، همه با هم "خلبانان، ملوانان" خوندن [FACE_WITH_TEARS_OF_JOY][FACE_WITH_TEARS_OF_JOY][FACE_WITH_TEARS_OF_JOY]	2	1	0	1	0	relevant
از عشق مسیح و محمد، قلبم له لهه. این دوتا حرف می زنن و من از ذوق خودم رو چنگ می زنم.	0	1	0	0	3	relevant
حتی وقتی پشت فرمونمم معذب میشم اگه بزرگ جمع بره عقب بشینه بعد میاین سر اینکه مادر شوهر جلو بشینه یا عقب دعوا می کنین!؟	0	1	1	0	3	relevant
: امسال موقع گره زدن سبزی سیزده به در واقعا سال دیگه خونه شوهر بچه تو بغل به امید خدا [RING]	1	1	0	0	3	irrelevant
حتما با من خوب رفتار نکردی. که با پشت دست می زنم دانت پرخون بشود. [SNEEZING_FACE][WRITING_HAND_LIGHT_SKIN_TONE]	0	0	3	0	3	irrelevant
از اونجایی که خیلی شکمو هستم چند همسری رو انتخاب میکنم [FACE_WITH_TEARS_OF_JOY][FACE_WITH_TEARS_OF_JOY][FACE_WITH_TEARS_OF_JOY]	1	1	0	0	3	relevant
از اوضاع جهان باخبر هستی، زلنسکی را میشناسید؟ امریکا چند بار برایش پیشنهاد فرار داد ولی مانند مرد ایستاد از شما کرده جوان است و هم همسر مقبول دارد، ولا اگر طرف تو دیده شود یا ککوگل فرسوده وطن را به پاکستان تحویل دادی مردم را فریب دادی تو فریب کار دزد. لعنت به همان شیر که خوردی	0	0	3	0	3	irrelevant
عکس شوهرت دیگه همه جا پخش شدههههههه جییییییین	0	1	2	0	3	relevant
چقد من از کلمه ی پارتنر بدم میاد [GRIMACING_FACE]	0	1	1	0	3	irrelevant
: هیچ زن و شوهری حق ندارند درباره زندگی زناشویی خود با هیچ کس هیچ وقت هیچ حرفی بزنند .	0	1	1	0	3	relevant
به این دلیل یکی: سلام خانم من از شما خوشم اومده تو: گمشو کثافته خر برو از خار مادرت خوشت بیاد مرتیکه	1	0	3	0	3	irrelevant
رفت تو لیست از این کتابایی که بدرد زندگی متاهلی بخوره بازم میشناسین؟	2	1	2	1	2	relevant
: حضرت علی میگه: بزرگترین جهاد زن شوهرداری در بهترین شکل ان است… از همون صدراسلام معلوم بوده مردا چه موجوداتین که شوهردا…	0	1	1	0	3	relevant
[GRINNING_FACE_WITH_SWEAT][GRINNING_FACE_WITH_SWEAT] ببین این که نگرانشی رو من کل عمرم میشناسم. نگرانش نباش، اونم به تعداد مکفی پارتنر داشته.	0	0	3	0	3	irrelevant
به به مبارکه هدیه خانمممممم	0	0	3	0	3	irrelevant
خانم من از عکستون خیلی خوشم امد بخاطر همین اینو واستون درست کردم امیدوارم دوست داشته باشین [BEAMING_FACE_WITH_SMILING_EYES][SMILING_FACE_WITH_SMILING_EYES][ROSE][ROSE][ROSE][ROSE]	1	0	3	0	3	irrelevant
- همسر کیلین مورفی هستن کراش نصف دخترای ایرانی، اینجاست که میگن زیبایی توی وجود اونیه که دوسش داری نه جای دیگه [FACE_WITH_ROLLING_EYES]	0	1	0	0	3	relevant
یه سوال این درسته که حتی دادگاه هم نمیتونه زوجه رو مجبور کنه بره خونه ی شوهرش و صرفا عدم تمکین مجازات حقوقی داره و نفقه رو سلب میکنه و مجازات کیفری نداره؟	0	1	1	0	3	relevant
اوا چه پررو درباره زن من حرف میزنیا	2	1	0	1	0	relevant
اون پارتنر کنکلهههه	1	0	3	0	3	irrelevant
پارتنرم برام چشم زخم خریده وصل کنم به خودم:)))))))))))))))))	2	1	0	1	0	relevant
از کجا معلوم همسر اینده ت تو یکی از همین پارتیا نباشه	0	1	0	0	3	irrelevant
هشدار: شوهر گرامیش هرچی دیر تر بیای، ایشان بیشتر عیدی به من میده [RELIEVED_FACE]	0	1	0	0	3	relevant
خانم من وضعم وخیم تر از این حرفاست [PENSIVE_FACE]	0	0	3	0	3	irrelevant
سید جان 2تیپ زن داریم همسر عاشق و زن کاسب مهشید پول رو عاشق است	0	0	3	0	3	irrelevant
ما تو فامیل خودمون مشکل نداره ولی تو خانواده شوهر مادر شوهر خیلی حساسه	2	1	1	1	1	relevant
امروز استادم صدام کرد که من زنم دپرس شده توی این شهر کوچیک و میخوام برم دانشگاه قبلیم که شهرش بزرگتره. من هم سه سال و خورده ای اینجا ساکن بودم باید جمع کنم برم اونجا بخاطر زنش! وگرنه باید استادمو عوض کنم!!!	0	1	1	0	3	relevant
الان شما نگرانی یک شوهر از ذخایر شوهرهای ایران کم بشه؟	0	1	1	0	3	irrelevant
اقا ولی خدایی توییتایی که با ایفونم میزنم بیشتر فیو میخوره چرا اخه؟ [ROLLING_ON_THE_FLOOR_LAUGHING][FACE_WITH_TEARS_OF_JOY][FACE_WITH_TEARS_OF_JOY][FACE_WITH_TEARS_OF_JOY]	0	0	3	0	3	irrelevant
خو اول شما رو شوهر میدیم تا نوبت اوشون بشه	0	0	3	0	3	irrelevant
تولدت مبارک عشق دوست داشتنی رفیق گلم دختر دوست داشتنی گروه بامراما [SMILING_FACE_WITH_HEARTS] خیلی خوشحالم که توییتر دوستی مثل تورو بهم داد کنار بردیای عزیزت و همسر عزیزت همیشه شاد و خوشبخت باشی [SMILING_FACE_WITH_HEARTS][HEART_SUIT][WOMAN_DANCING][BIRTHDAY_CAKE]	1	1	0	0	3	relevant
سینااا شوهر عزیزم کی بهت اجازع دادع رو توییت ی دختر دیگ ریپلای بزنییی [FACE_WITH_TEARS_OF_JOY][ROLLING_ON_THE_FLOOR_LAUGHING][ROLLING_ON_THE_FLOOR_LAUGHING]	2	1	1	1	1	relevant
مخالفم. در شان زن نیست که بایسته. فقط خوابیدن در رختخواب در انتظار تشریف فرمایی همسر ولی نعمتش در شان زن هست.	0	1	1	1	1	relevant
خواب دیدم دوست دخترم بعد دوتا قرار باهام بهم زد ولی من اصلا دوست دختر ندارم	1	1	2	0	3	irrelevant
انشالله شوهر پیدا بشه	1	1	2	0	3	irrelevant
چرا میزنی مامانم برام سفید درست میکنه ولی خانمم کاکایو یی درست میکنه برام	2	1	0	1	0	relevant
بی ادبا :)))))) منظور عید دیدنی خونه خانواده شوهر و عیدی اوردن و بردن و این کوفتا بود	2	1	1	1	1	relevant
حالا دوست پسر من بود میگفت اب بزار یخ بزنه فک کن بستنیه بخور	2	1	1	1	1	relevant
شوهر من باید از نظر تولید مثل فقط پسر درست کنه تامام بچم دختر بشه میذارم پرورشگاه	2	1	2	1	2	irrelevant
خوش ب حال خودم نه مادر شوهر دارم نه مادر زن فقط یه ننه دارم تاج سرم	1	1	0	0	3	irrelevant
ایشالا همیشه شاد باشید در کنار همسرتون و دختر نازنین تون	0	0	3	0	3	irrelevant
به مشکینی کلک زده بود گفته بود با دخترت فقت عقد بکنیم بعد از 13سالگی عروسی کنیم اما بلافاصله بعد از عقد اومد گفت قانون زنم هست و میخوام ببرم خونه ام	0	1	1	0	3	relevant
چرا میشه اما به شرط اینکه تا اخر امسال شوهر کنه بچه دار بشه [BEAMING_FACE_WITH_SMILING_EYES]	0	0	3	0	3	irrelevant
خدایش نمونه بارز شوهر و دوست پسر و همه چی تمومه [HANDSHAKE][SMILING_FACE_WITH_HEART_EYES][SNEEZING_FACE][FACE_WITH_TEARS_OF_JOY]	2	1	0	1	0	relevant
من چیز بد نمیدم خانمم:))	2	0	3	0	3	relevant
میخوام از ابن به بعد اگه پسری بهم جملاتی مثل " خوشبحال پارتنرت" و اینا گفت که بفهمه سینگلم یا نه بگم : اره واقعا خوشبحال دوست دخترم =))))	1	1	2	0	3	irrelevant
کاملا مشخصه بدنم بیش تر از من متوجهِ استرسمه. این طور که موهام تو حموم می ریزه و جوش های دردناک می زنم، مشخصه یه چیزی هست خودم خبر ندارم.	0	0	3	0	3	irrelevant
: باهرنگاه بر پیشانی تو هزار بوسه میزنم من عشقم را دلارم را از صدای تو میگیرم [FACE_WITH_TEARS_OF_JOY][FACE_WITH_TEARS_OF_JOY][FACE_WITH_TEARS_OF_JOY] مهشید خرس گنده خلیج همیشگی فارس https://…	0	0	3	0	3	irrelevant
: همین یه ربع پیش از لیمیت بودن در اومدم.. زیاد نمی زنم که پاره نشم. stayalive by jungkook (prod. s…	0	0	3	0	3	irrelevant
من از اینت شوهر خالم از چاپخونه محل کارش می اورد برام یادش بخییییرررر [SMILING_FACE_WITH_HEART_EYES][SMILING_FACE_WITH_HEART_EYES][SMILING_FACE_WITH_HEART_EYES][SMILING_FACE_WITH_HEART_EYES] الانم هنوز مجردم [GRINNING_FACE_WITH_SWEAT]	1	0	3	0	3	irrelevant
خدایا یه رفیق،پارتنر،دوست دختر،شوهر،فامیل اصلا نسبت مهم نیست یکیو بده به من که انقد دوستم داشته باشه که برام تند تند دلمه درست کنه [SAD_BUT_RELIEVED_FACE]	1	1	2	0	3	irrelevant
بدبخت هاش هم در حسرت شوهر و زن و بچه	0	1	1	0	3	relevant
خانم من از عکستون خیلی خوشم امده [GRINNING_FACE_WITH_SWEAT][ROSE] اینو واستون درست کردم امیدوارم قابل بدونید[BEAMING_FACE_WITH_SMILING_EYES][SMILING_FACE_WITH_SMILING_EYES][ROSE][ROSE][ROSE]	0	0	3	0	3	irrelevant
من خودم به خودم میگفتم روابط دوستی دختر و پسر عادیه و نباید سرش امل بازی در بیارم ولی از صبح که توییتو دیدم با اینکه خودمم رفیق پسر دارم میگم واقعا یه خرده حساسیت سر دوستای جنس مخالف پارتنر لازمه. همه که مثل ما نیستن حد و حدود بدونن و اون طرفم ادم درستی باشه.	0	1	1	0	3	relevant
چیه هی به دخترا میگین چرا شوهر نمی کنی؟؟؟ توام که شوهر کردی دو روز بعد با یه تیبا 2 برگشتی خونه بابات! میخواستی فقط خونه مجردی داشته باشی؟	0	1	1	0	3	relevant
من خودم دو سه بار تا شیراز رفتم تا اوکی شدم الان اعتماد به نفس بیشتری دارم و همسرم بیشتر منو دوست داره	2	1	0	1	0	relevant
دیگه وقتشه زنت بدیم [FACE_WITH_TEARS_OF_JOY][BROKEN_HEART]	0	1	2	0	3	irrelevant
اقا پریده حساب کن بنده شوهر دارم	2	1	2	1	2	relevant
[FACE_WITH_TEARS_OF_JOY][FACE_WITH_TEARS_OF_JOY]فانه وگرنه مارو به شوهر حوصلشو ندارم اصلا[GRINNING_SQUINTING_FACE]	1	1	1	0	3	relevant
این لعنتی داره کم کم باعث میشه من به شوهرم خیانت کنم [FACE_WITH_TEARS_OF_JOY][BROKEN_HEART]	2	1	1	1	1	relevant
میدونین چرا من کلا ادم ریلکسی ام؟چون یه سگ دارم منو به سرزمین زیبای پی پی سگ داده که دنیا برایم تکراریست. اینطوری که نصف شب عین چی میاد با پوزه ش تو حلقم که منو بغل کن بکپم.سگ حسابی من با شوهر نداشتم اینقد صمیمیت نداشتم،نصف شبا میگه پتو بزن کنار بیام بخوابم پیشت، عادی نیست واقعا	1	0	3	0	3	irrelevant
نه من از زنم نمیخوام	2	1	2	1	2	relevant
منم نمیدونستم اما همسر یکی از خانمای ایرانی که شوهرش کره ایه گفت [FACE_WITH_TEARS_OF_JOY]	0	1	2	0	3	relevant
پارتنر داشتن به معنی نفی استقلال شما نیست، اعتماد کنین، واسه رخنه کردن تو هر فضای خصوصی هم اصرار نکنین، اگه صداقت حاکم باشه، اتفاقی نمیوفته.	0	1	0	0	3	relevant
ولی هیشکی با دیدن شاتِ عیدی های میلیونی همسرتون به شما، به ازدواج ترغیب نمیشه!	1	1	1	0	3	relevant
بابا [ROLLING_ON_THE_FLOOR_LAUGHING][ROLLING_ON_THE_FLOOR_LAUGHING] ما ک شوهر داریم تو مهمونی ها دورترین حالت ممکن میشیینیم ک کسی نگه اینا عقده این	2	1	1	1	1	relevant
با دعوا و پرخاشگری با مامانم صحبت میکنم، مدام غر میزنم،میل جنسی ندارم و نمیتونم نیاز همسرم رو رفع کنم،انرژی ندارم،مدام به مرگ خودم و اطرافیانم فکر میکنم و حتی هر شب خوابش رو میبینم بله دوستان! افسردگی رو بغل کردم.	2	1	1	1	1	relevant
یعنی چی من شوهر دارم؟ من روت حساب کردم	2	1	2	1	2	relevant
تا وقتی زنت نشه این اتفاق نمی افته	0	0	3	0	3	irrelevant
یادم اومد یکی بود دانشجوی علوم سیاسی بود بعد زنگ زد برو بی بی سی رو ببین،زدم بی بی سی دیدم زنگ زده داره در مورد یه چیزی نظر میده [FACE_WITH_TEARS_OF_JOY]خب لامصب به عنوان کارشناس که دعوتت نکرده بودن(که اونم مهم نبود) الان چیکار کنم زنت بشم؟[FACE_WITH_TEARS_OF_JOY][FACE_WITH_TEARS_OF_JOY][FACE_WITH_TEARS_OF_JOY]	1	0	3	0	3	irrelevant
فک کنم واسه همه ایرانی ها نوشتن وقتی اومدی المان اول باید بری ارلانگن ی چند وقت زندگی کنی من و همسرم هم ی مدت کوتاه اوایل اونجا زندگی میکردیم و خیلی خوب بود.	2	1	0	1	0	relevant
اگه فامیلای زنت هم اینجوری بودن چی ؟	0	1	2	0	3	relevant
امسال سال اشتیه… تا الان بیشتر از ده مورد رل،زن و شوهر،فامیلایی که بیشتر از 15 سال با هم قهر بودن دیدم که اشتیدن [SMILING_FACE_WITH_HEART_EYES] قشنگه ولی[PLEADING_FACE][FOLDED_HANDS_MEDIUM_LIGHT_SKIN_TONE]	0	1	0	0	3	relevant
از چیزایی که مخالفشم ولی زیاده اینه که رابطه به خاطر بهره بردن از موردی خاص از شرایط طرف مقابل باشه چون پارتنر وقتیx رو به دست اورد دیگه براش بی اهمیت میشی و چون شرطی بوده دچار فروپاشی حسی میشه و یادش میفته از قبل تو شروع کنه پس اگر پارتنر بنفیتی رو خودت نزاری کنار زندگیت خرابه	0	1	1	0	3	relevant
من خودم چشمک زنم بابا…	0	0	3	0	3	irrelevant
خیلی بده، سر پارتنر ،سر درس ،سر همه چی این داستان واسم پیش میاد [SLIGHTLY_SMILING_FACE][MAN_FACEPALMING]	2	1	1	1	1	relevant
از همون دقیقهٔ اول قسمت اول برای هر کدوم یه مثال برات می زنم:	0	0	3	0	3	irrelevant
قهرم وا برو پیش همسری جونت، النا	0	1	2	0	3	relevant
ابی دیگر اون صدای همیشگی را نداشت که اقتضای سن هست و اونقدر هم نیاز به پول نداشت که به مردم کشور خودش خیانت کند، بارها اظهار نظر سیاسی و حتی اهنگ سیاسی خوانده بود. مرد تو به پول دیگه نیاز نداشتی اسطوره بودن خودت رو حفظ میکردی و اینقدر حقیرانه حرف نمیزدی	0	0	3	0	3	irrelevant
منم قشنگ میرقصم ولی چون گفتن رقص زن فقط برای شوهر جایز می باشد، منم نمیرقصمو همه ی رقصامو گذاشتم فقط و فقط واسه اقایی [RELIEVED_FACE]	2	1	0	1	0	relevant
شما درس و مشق دارید [BEAMING_FACE_WITH_SMILING_EYES] باعث افتخاره که با خانمتون اشنا بشویم و دوستان خانوادگی شویم[FOLDED_HANDS]	2	1	2	0	3	relevant
اول فکر کردم یه چرتوپرتی سر هم کرده ایمپرشن بره بالا؛ بعد که منشنا رو دیدم اصلا یه وضعیتی بود که حالم بهم میخوره ازش. بعد میگن چرا به دوست صمیمی (جنس مخالف) پارتنر تون اعتماد ندارید یا پارتنرتون درباره شما چنین اعتمادی نداره. خب همین چیزا رو می بینن که ریده میشه به اعتماد دیگه.	0	1	1	0	3	relevant
هر روز شش هفت بار میخوام تو صورتش داد بزنم «بمیر دیگه عزیزم [WHITE_HEART] .» ولی خب متاسفانه ادب حکم میکنه که چیزی نگم.	2	1	1	1	1	relevant
اهااا ازون نظر… مغز من اصلا سمت شوهرو ازدواج نمیره برا همین به فکرم نرسید	1	1	2	0	3	irrelevant
من همیشه استرس اینو دارم یوخ شوهرم زشت نباشه که بچه م زشت شه:)) پ.ن: در جواب عن خوری های احتمالی باید بگم، اره من خودمم زشتم واس همین میخام باباش زشت نباشه:))))	1	1	1	0	3	irrelevant
منم ریشامو که میزنم بیبی تر میشم ولی تو رسما یه ادم دیگه میشی:))	0	0	3	0	3	irrelevant
دانشمندا میگن از هر 3 نفر یکی تو رابطه خیانت میکنه منم نمیدونم دوس دخترم داره بم خیانت میکنه یا زنم	2	1	1	1	1	relevant
وسط دعوا نرخ تعیین نکنیدلطفا 11 دقیقه و 11 ثانیه پس از فوت اون 11 خانمی که مشغول تدارکن جزو همسران اینده و جانشین مرحومه مغفوره به حساب میان وقرار محضرشون توی مسیرقبل از مراسم تدفین تعیین شده	0	1	1	0	3	relevant
بدترش اینه انشالا شوهر خوب گیرت بیاد من نخوام ازدواج کنم کیو باید ببینم [WOMAN_FACEPALMING_LIGHT_SKIN_TONE]	1	1	1	0	3	irrelevant
: ولی من از زندگی پارتنر مهربون میخام که بغلم کنه نه قرن و سال جدید!!!!!!!!!!!!!!	1	1	2	0	3	irrelevant
نع اما پارسال اقدس خانم به شوهرش میگفت بریم کربلا سر از کانادا در اورد	0	1	2	0	3	relevant
فک کنم اصلاح شد چون اون وسط زن و شوهر داشتن میریدن بهم که چرا مث خر رانندگی میکنی:)))))	0	1	1	0	3	relevant
این از وقت بود من نامزدم در دانشگاه مزار است بعضی وقتها حتی گارد ماشه میکند تفنگ اش را سر دخترا	2	0	3	0	3	irrelevant
درسته که در حق زنان اجحاف شده در طول تاریخ…شکی درش نیست..اما مسایل قاطی شده…زنان خودشون رو شبیه مردان میکنند به زعم اینکه احقاق حق کنن و عقده تاریخی رو بشکنن…زن منزلت والایی داره…حق اولاد…حق رانندگی…حق ارگاسم جنسی..حق طلاق ..حق رای..و خیلی از حقوق دیگه	0	1	2	0	3	relevant
امسال رو سال شوهر کردن نام گذاری می کنم! ایشالله که الحمدالله	1	1	2	0	3	irrelevant
تو اول ازهَمه بهترین رفیقَمی، بعد پارتنرم.بخاطرِ همین مایهِ ارامشی و تو ار شرایطی اولویتی..	2	1	0	1	0	relevant
امیدوارم به همسر ایندت شب عروسیت اصفهونی ادرس ندی [FACE_WITH_TEARS_OF_JOY]	1	0	3	0	3	irrelevant
مبارک امارت اسلامی تان. خوب صلح امده. پیش زنش شوهر را بی عزت میکند	0	1	1	0	3	relevant
یه دوستی میگفت من ترجیه میدم یه شوهر ثروتمند خاین داشته باشم تا یه شوهری که همه عمر دنبال یه لقمه نون باشه هرچند وفادار باشه	0	1	1	0	3	relevant
قربونت بشم منم تو رو خیلی دوست دارم یکی از بهترین اتفاقات سال پیش من اشنایی با تو و دوستان خوب مشترکی با هم داریم بود خوشحالم که هست تو هم سال خوبی در کنار همسر عزیزت و دوتا گلت داشته باشی	0	1	2	0	3	relevant
: همه به فکر تدارک شب عیدن همسرم میگه اولین سحری غذا چی داریم؟! نوروز1401	2	1	1	1	1	relevant
من اینجوری به قضیه نگاه می کنم، باید ارزشی را پیدا کرد که به زندگی معنا می ده. مثلا عشق، اگر هدف گرا باشی هدفی مثل ازدواج یا یافتن پارتنر ایده ال اگه به دست نیاد ناامیدی و استیصال نصیب می شه، ولی از دید معناگرایی تا زمانی که در زندگی کاری در راستای عشق انجام بشه زندگی معناداره	0	1	2	0	3	relevant
هذیان نوع حسادت : اینجا فرد هذیانی به طرز بیمارگونه ای همیشه توهم اینو داره که همسر یا معشوقه ش وفادار نیست سلامت امروز	0	1	1	0	3	relevant
بله به خانمم میگم	2	1	2	1	2	relevant
امان از بی شوهری [PERSON_FACEPALMING]	1	1	1	0	3	irrelevant
از اول سال گیر داده به پدر شوهر اقاییو با جناق ها خدا رحم کنه واقعا [FACE_WITH_TEARS_OF_JOY]	2	1	1	1	1	relevant
براساس یک پژوهش دیگر 38 در صد زنان در افغانستان خلاف میل شان به شوهر داده شده اند. و بیش از 50 در صد زنان طبق گفته خودشان از زندگی خانوادگی خود هیچ رضایتی ندارند. [OPEN_BOOK] سنگ و سار	0	1	1	1	3	relevant
به خاطر ندیدن شوهر خالتم که شده باید میومدی اردو [FACE_WITH_TEARS_OF_JOY]	0	0	3	0	3	irrelevant
چندی پیش یک وبسایت اصولگرا درباره فشار وارد بر خانواده های طلاب و زنان انها نوشته و گلایه کرده بود. حالا یک وبسایت مشابه دیگر از روان پریشی همسران طلاب و تنزل جایگاه روحانیت که کار انها را به گلایه و شکواییه علنی در رسانه ها کشانده، ابراز نگرانی کرده است!	0	1	1	0	3	relevant
: بچم موهاش به مامان ببعیش بره چشماش به پارتنرم فک نکنم چیز دیگه ای بخوام [NEUTRAL_FACE][FACE_WITH_TEARS_OF_JOY]	2	1	0	1	0	relevant
قربونت بشم اره که زنت میشم [SMILING_FACE_WITH_HEART_EYES][PINCHED_FINGERS_LIGHT_SKIN_TONE]	2	1	0	1	0	relevant
منبع جان میگه: on the basis of that, which she is referring to the fact she doesn't speak farsi btw she does! البته منابع اگاه خودشون حتما میدونند یک فرانسوی که عبری هم میدونه و در انگلیس شوهر عرب می کنه فارسی رو چند روزه یاد گرفته! دیگه من چیزی نگم [NEUTRAL_FACE]	0	1	2	0	3	relevant
من واقعا بد شوهر میخوام	1	1	1	0	3	irrelevant
وا معلومه که نه. اون اجیمه خدا یکی، زنم یکی [PLEADING_FACE]	2	1	2	1	2	relevant
یه شوهر میخوام مثل مینسوکی اهل تمیز کردن باشه (تر و تمیز) مثل کیونگسو اشپزی ش خوب باشه مثل سوهو ریچ من باشه	1	1	2	0	3	irrelevant
توام غیر مستقیم تیکه بنداز بگو فایده نداره من زیاد میرم خوزستان اونجام باید یکی دوتا پارتنر بگیرم خیالم راحت باشه هم اینجا عشق و حالم به راه باشه هم اونجا	2	1	2	1	2	relevant
اگر منظورت اینان که اینا هم از خیلی از ماها عاقل تر بودن . همه مردتر . اوکراین جنگ شد مرد و زن و کودکو سلاح به دست کردن . هم شدن جنگ جو هم سپر انسانی .	0	0	3	0	3	irrelevant
دیگه وقت شوهر کردنه [PENSIVE_FACE][PINCHED_FINGERS_LIGHT_SKIN_TONE]	1	1	2	0	3	irrelevant
حاجی من هنوز فکر می کنم خوابم میگیره ، ولی باشگارو باید شروع کنم دیگه، شکم شوهری دارم در میارم… :)))	1	0	3	0	3	irrelevant
درسته [OK_HAND][BEAMING_FACE_WITH_SMILING_EYES] ان شاالله در کنار همسرتون خوشبخت باشید همیشه[FOLDED_HANDS]	0	1	2	0	3	relevant
یا کامیون می خرم، پرتقال بار می زنم، همه تون رو می ندازم لای پرتقال ها میارم اینجا.	0	0	3	0	3	irrelevant
دانشمندا میگن از هر 3 نفر یکی تو رابطه خیانت میکنه نمیدونم دوس دخترم داره بم خیانت میکنه یا زنم	2	1	1	1	1	relevant
تعبیرش اینه که قراره به زودی زن من شی	1	1	0	0	3	irrelevant
تو کتابخونه دانشگاه مجله های دوره شاه بود. یه صفحه ش مخصوص همسریابی بود. خودشونو معرفی میکردن میگفتن چه همسری میخوان. یه اخوند گفته بود یه زن میخوام 7 سال باشه توالت نرفته باشه. [GRINNING_SQUINTING_FACE] به ولای علی راست میگم	0	1	1	0	3	relevant
حس میکنم دوستیای یسریا با جنس مخالف با سکس پارتنر اشتباه گرفته شده .دوستی یعنی چی؟ لاس میزنین میگین ما رفیقیم ؟ [FACE_WITH_TEARS_OF_JOY]	0	1	1	0	3	relevant
هومممممم ازون لحاظ ورس تاپم اونم چون دوست پسرم داشتم میگم وگرنه با دخترا تاپ بودم ولی خب ددیم نمیگم به خودم	2	1	1	1	1	relevant
ما هم چنین رسمی نداشتیم. ولی در خانواده همسر خیلی رسم قدرتمندی ست و الان ما را از ان راه فرار نیست. :))	2	1	1	1	1	relevant
یا هر نگاه با هر نگاه بر اسمان قهوه ای ناپاک بوسه میزنم نفسم را از عجمان و فجیره، از ابوظبی و دوبی و خلیج جعلی کفتاران تازی میگیرم من نگاهم مثل لاشخور، دنبال تنب کوچک و بزرگ و ابوموسی سگ دو میزند من عشقم را، به دلار و یورو، و پوند و یوان، و روبل حتی فریاد خواهم زد فریاد خواهم زد	0	0	3	0	3	irrelevant
میگه برنامت برای بعد از این 6 سال چیه؟ مرد من تنها برنامم اینه که تا اخر هفته خودمو زنده نگه دارم	0	0	3	0	3	irrelevant
از قدیم گفتن زنو شوهر دعوا کنند ابلهان باور کنند [HANDSHAKE][FACE_WITH_TEARS_OF_JOY]	0	1	2	0	3	relevant
1.چرا همش فکرت اینه ایرانو مقایسه کنی تو میگی تفکر جدید و ازادی جنسی خوبه من دارم برات نمونه کشوری رو مثال میزنم که میتونی اثرات اش رو کامل ببینی اگه بنظرت کاهش عمر ازدواج ، بالا رفتن امار تجاوز ، فروپاشی مفهوم خانواده در جامعه ، افزایش سقط جنین ، بالا رفتن بیماری های مقاربتی	0	1	1	0	3	relevant
تاحالا از یکی بدم نیومده پارتنرم ندارم [BEAMING_FACE_WITH_SMILING_EYES]	1	0	3	0	3	irrelevant
شک ندارم همه میدونن کی زن هست کی شوهر [ROLLING_ON_THE_FLOOR_LAUGHING]	0	1	2	0	3	relevant
تو خونه ی خودمون هم هی من میگم اماده بشین بقیه نمیشن دخترم لباس می پوشه به شوهرم میگم تو هم بپوش میگه من اماده ام یه شلواره یه پیراهن دیگه بعد بلند میشه نیم ساعت میره دسشویی مسواک میزنه دنبال جورابش میگرده دنبال سوییچ میگرده ما همچنان اماده منتظریم اقا اماده شه	2	1	1	1	1	relevant
هر دو طرف چه زن چه مرد زنی هم که شوهر داره حتا خود زنه بگه جان عزیزتون وارد رابطه نشید	0	1	1	0	3	relevant
فقط یک نصیحت بکنم عزیز جان، با توجه به علاقه ای که به خانواده ات داری حتماً در مقام عمل دختر مورد نظر رو مورد ازمایش قرار بده. حداقل 80 درصد دخترهای امروزی قطع رابطه با خواهر و مادر شوهر رو جز دستور کار بعد ازدواج قرار میدن.	0	1	1	0	3	relevant
خیر چ معنی داره زنو شوهر باهم رابطه جنسی داشته باشه این کصافت کاریا چیه [NEUTRAL_FACE]	0	1	1	0	3	relevant
اینو شوهر جان باید بهت میگفت… قدیم که اینجوری بود حالا زمانه عوض شده [FACE_WITH_TEARS_OF_JOY][FACE_WITH_TEARS_OF_JOY][FACE_WITH_TEARS_OF_JOY]	2	1	0	1	0	relevant
وقتی یه صبح تا غروب تلگرام سر نمی زنم:	0	0	3	0	3	irrelevant
جواب «چرا ازدواج نمی کنی؟» تو عید دیدنی، فقط تو شوهرتو/زنتو بده من می گیرمه	1	1	1	0	3	irrelevant
دوست دختر من لیاقت نداشت الان باید میومد منو جمع می کرد	1	1	1	0	1	relevant
اصولا وقتی یه زن شوهرش میزنه اون مرده کاملا میتونه مهارش کنه یا بزنتش اگر اینکارو نمیکنه صرفا بخاطر اینه که نمیخواد ولی خانوما توانایی مقابله رو ندارن وقتی همسرشون روشون دست بلند میکنه	0	1	1	0	3	relevant
چشمت به زن منه از صب [BROKEN_HEART][PENSIVE_FACE][FOLDED_HANDS_LIGHT_SKIN_TONE]	2	1	1	1	1	relevant
[CANDLE]پارتنر و کیت کت میخوام[CANDLE] به امید حق[PALMS_UP_TOGETHER]	1	1	2	0	3	irrelevant
نه دوست دخترم هدیه داد ،نه بابام گرفته نه بهم کادو دادن نه مامانم گرفته خودم وقتی دوستم حواسش نبود کش رفتم	2	1	1	1	1	relevant
عید تو هم مبارک الاهه خانم، و عید پسر برومند و همسر عزیزت هم [GRINNING_FACE]	0	1	2	0	3	relevant
زن منو تو نداریم که.	2	1	2	1	2	relevant
بگو مامان بالاخره عروس خودشو باید یطوری تو دل مادر شوهر جا کنه دیگه امتحان کردم مادرا دوس دارن [FACE_WITH_TEARS_OF_JOY][FACE_WITH_TEARS_OF_JOY]	2	1	0	1	0	relevant
من الان بایدد پیشش محبوبوم میبودم ، نه با حرف های مسخره شوهر خالم الکی بخندم.	2	1	1	1	1	relevant
شوهر رایگان برای دخترایی که بلد نیستن برقصن	0	0	3	0	3	irrelevant
والا اوایل مقاومت می کردیم و زنم خیلی ناراحت می شد بهش بر میخورد الان دیگه هرکس میگه میگیم ایشالاه ایشالله	2	1	1	1	1	relevant
همه چی جز شوهر	1	1	1	1	1	relevant
معلومه که اکانتت توسط مهشید پولکی زن ابی اداره میشه ببین دیگه شوهرت در میان مردم مظلوم ایران جایگاهی نداره چون شوهر تو بی هویت قلمداد میشه چون خودش پشت پا زد به تاریخ ایران خلیج فارس ابی گوه خورد	0	0	3	0	3	irrelevant
چون همسر من بعد از اماده شدن من تازه می ره سرویس مسواک بزنه دندوناش تمیز باشه [FACE_WITHOUT_MOUTH]	2	1	1	1	1	relevant
شوهر داری؟ مگه الکیه من ریش گرو میذارم.	0	0	3	0	3	irrelevant
اگه زنم بلد نباشه با دندون چادرشو بگیره و همزمان بچه هامو تو بغلش نگه داره چی؟	2	1	1	1	1	relevant
تو که قرتی نیستی! بدبخت شوهرت.	0	1	1	0	3	relevant
میخواهی برایت پیشگویی کنم؟؟؟ تو در اینده ای نه چندان دور همسر عزیزِ (من) خواهی بود !!! و البته خیلی خوب نیست ادم قسمتی از اینده را بداند چون نمیدانم با تو خوشبخت خواهم شد یا نه؟؟؟!!! ولی میدانم تو مرد بسیار خوبی هستی!!! 13 سال عمرم با مردی هدر شد که از قبل عاشق زن دیگری بود…	2	1	1	1	1	relevant
سال نوی تو و همسر هم مبارک	0	1	2	0	3	relevant
[FACE_WITH_TEARS_OF_JOY][FACE_WITH_TEARS_OF_JOY] تنها قابلیتی که تو فصول داشتم تا الان خواب زمستانی بوده [ROLLING_ON_THE_FLOOR_LAUGHING][ROLLING_ON_THE_FLOOR_LAUGHING] شوهر پاشده با خانواده رفته دَدَر فعلا لذت داره منو میبره [SMILING_FACE_WITH_TEAR]	2	1	1	1	1	relevant
من از تو حرف می زنم شب عاشقانه می شود	0	0	3	0	3	irrelevant
به زنم دست نزن تروخدا	2	1	1	1	1	relevant
[FACE_WITH_TEARS_OF_JOY][FACE_WITH_TEARS_OF_JOY] تو پادگان بهمون میدادن فایده نداره بدتر میشه [SMILING_FACE_WITH_TEAR] من لای کافورا شوهر زدم [ROLLING_ON_THE_FLOOR_LAUGHING][ROLLING_ON_THE_FLOOR_LAUGHING]	0	0	3	0	3	irrelevant
برای شفای پدرم دعا کنید لطفاً میرزا علی عینی مقدم برای من و همسر و پسرم هم دعا کنید ممنون میشم [FOLDED_HANDS]	2	0	3	0	3	irrelevant
اقا امان از جو گرفتگی دقیقا صداش مثل رعد و برق کذایی کرمانشاه در اسمان صاف و بی ابر فرداش بگوش میرسه.گفتم اول فرن دو رکعت ورزش و پیاده روی بزنم به کمرم ابتدای رکعت اول سرسیلندر سوزوندم ولی گفتم باید ادامه بدم الان دیگه اتاق تعویضی شدم.اقا دانش بنیادم به فاک رفت	0	0	3	0	3	irrelevant
مریم رجوی کیه که پیام نوروزی داده؟ همونی نیست که شوهرش طلاقش "داد" که رفیقش "بگیردش"دقیقا به فرهنگ لغات اخوندی و کسی که از خود اخوندا بیشتر چسبیده به لچک تحمیلی خمینی به زنان ازاده ایران؟؟ملتی که از خمینی پیرمرد مجتهد عظما خنجر و شمشیر خورده یعنی میاد طرف گروه شیاد مسلمون دیگری؟	0	1	1	0	3	relevant
کودک همسری بگو خب	0	1	1	0	3	relevant
فک کنم یه توییت باید بزنم و بگم اقا از من بکشید بیرون من با شماها کاری ندارم خودتون دشمن تراشی میکنید والا	0	0	3	0	3	irrelevant
اگه امشب هم مثه یه ماه گذشته فیلم نبینم خودم رو با کنترل تلویزیون دار می زنم.	0	0	3	0	3	irrelevant
فایلاش هر کدوم 200 250 مگه، می زنم دانلود زووور می زنه نصف می شه یهو نت قطع و وصل می شه می پره، دوباره از اول . نمی دونم چه فحشی به چه کسی بدم حق مطلب ادا شه واقعا.	0	0	3	0	3	irrelevant
: چرا از هر دختری خوشم میاد یا فاب داره یا نامزد یا عقد کرده یا شوهر و بچه چه خبرتونه، چه خبرتووونه؟	1	1	1	0	3	relevant
سال75رفته بودیم نمک ابرود، سوار تاکسی شدیم راننده تاکسی و همراهش کلی عصبانی بود و جوش اورده بود!همسرم ترسیده بوده!با زبان عربی بهش گفتم نترس اینها مثل ما دلشان ازجای دیگری پر است بعداز اینکه راننده فهمید اهوازی هستیم مارا تا درب منزل رساند و تو مسیر از درد مشترک گفتیم از استعمار	2	1	2	1	2	relevant
همسرشان هم نیازبه لذتهای جدیدو متنوع و متناسب باروحیه واخلاقش رادارد،اینگونه افراد ازترس اینکه همسرشان انهارا رها کند نمیتوانند حتی تصور ازاد گذاشتن زن رابکنند،چون اعتماد به نفس ندارندوبسیار کمبوددارن و از خودشان مطمین نیستند،فقط ادعای مردانگی دارند در واقع طبل تو خالی هستند4/ [BACKHAND_INDEX_POINTING_DOWN]	0	1	1	0	3	relevant
اکثر مردان زنانی رو که از پارتنرشون پول می خوان یا زنانی که با بدن نمایی توجه می گیرند رو تحقیر می کنن اما پیج فیک می زنن و از بدن زن ها پول درمیارن یا دروغ می گن دخترن و مردان دیگرو می تیغن. نشون می ده نه مشکل اخلاقی با بدن نمایی دارن نه پول خواهی. اب نیست شنا کنند کونشون سوخته.	0	1	1	0	3	relevant
چه اتفاقی باعث میشه که خانواده های دادخواه احساس تنهایی کنند؟ مگر نه اینکه ما یک صداییم و فریاد زننده یک درد مشترک؟ من هم صدای خسته تو بودم و هستم! تو را باز هم فریاد می زنم. جمهوری اسلامی	0	0	3	0	3	irrelevant
دلم میخواست امشب خونه بابا بمونم، کمرمو بدم به بخاری و زیر لحاف روی زمین بخوابم. بی دغدغه، با خیال تخت. بعد متاهلی یه چیزایی برات ارزو میشه	2	1	1	1	1	relevant
خداوندا . . . یه سوال؟؟ همسر من رو خلق کردی؟؟	1	1	1	0	3	irrelevant
: شوهرمن کی شد دوس پسر شما؟ superjunior	2	1	1	1	1	relevant
شما که متاهلی [PENSIVE_FACE]	0	1	2	0	3	relevant
گوگوش تو برنامه تحویل سال و تکرارهای بعدش میخونه داغ یک عشق قدیمی رو اومدی تازه کردی…و من دلم هری میریزه از خاطراتی که با این اهنگ دارم. مردی که بعد از ده سال رفاقت اومد و شد این مرد… شب تولدم من با این مرد تصمیم گرفتیم در نهایت احترام و عشق از هم به عنوان پارتنر جدا بشیم/1	2	1	1	1	1	relevant
همسری اغلب فکر ها میره سمت زن ولی اینجا شوهره کودکهههههه خیلی کودم	0	1	1	0	3	relevant
زن میخوام. یکی زن من شه. برام زن بگیرید.	1	1	2	0	3	irrelevant
عاشق خندهای این خانمم [ROLLING_ON_THE_FLOOR_LAUGHING]	0	0	3	0	3	irrelevant
چند وقت پیش تو تاکسی با یکی سر ماسک حوصلم سر رفته بود همینجوری بحثم شد گفتم من دو دوز واکسن زدم دیگه ماسک نمیزنم،(حالا ماسک زده بودم اورده بودمش پایین)اون طرف میگفت اقا ربطی نداره شما باید ماسکت رو بزنی، پرسیدم اقا شما واکسن چی زدی؟ گفت من هنوز واکسن نزدم :)))))))))))	0	0	3	0	3	irrelevant
خیلی ممنونم. سلامت باشی. ایشالا شما و همسر گرامی هم. :)) [BEAMING_FACE_WITH_SMILING_EYES][RELIEVED_FACE]	0	0	3	0	3	irrelevant
نظرش با تو یکیه ولی ته دیگ از نظر من همسر اینده مه	1	0	3	0	3	irrelevant
من چرا مثل یه بچه دبستانی همه تمرین های دانشگاه حل کردم و الان از بیکاری دارم کپک می زنم	0	0	3	0	3	irrelevant
جیگر پس هم تو هم غلط میکنی اعتراض میکنی چرا دیه ات نصفه ارثت نصفه شهادتت نصفه و تمکین نمیکنی از شوهر گه میخوری حکومتی که خرجتو داده	0	1	1	0	3	relevant
تو این اشفته بازار اقتصادی از تورم عده ای فقط هزینه نفس کشیدنشون به زور می دن جز خدا کسی خبر نداره.انشاالله خدا همسر ذات پاک بهتون بده .	1	0	3	0	3	irrelevant
برای من تو خانواده ی همسرم این اتفاق میفته	2	1	2	1	2	relevant
واسه این میان عید دیدنی که دخترای مجردی مثل تورو شوهر بدن	0	1	1	0	3	irrelevant
[CONFUSED_FACE] عزیزم کسی که رفته حتی لیاقت نداره تو به عذر خواهیش توجه کنی. حتی اگر یه روزی ادمد عذرخواهی هم کرد یکی از طرف خودت، یکی از طرف من بزن تو دهنش.	0	1	1	0	3	relevant
چطوری هم متاهلند هم دوست پسر دارن هم باهاش میرن بیرون… من یه روز جواب دایرکت یه نفر و توی اینستا گرام دادم تا چند هفته فکر میکردم به همسرم خیانت کردم///:تا این حد متعهدم بهش [PENSIVE_FACE] میدونم خیلی سخت گرفتم ولی راضیم از خودم	2	1	0	1	0	relevant
این عکسو باید به خانمم نشون بدم. همه این شرایطو داره [BEAMING_FACE_WITH_SMILING_EYES]	2	1	2	1	2	relevant
؟ تو به هر کرانه گرم رستخیز من خزان جاودانه پشت میز یک جهان ترانه ام شکسته در گلو شعر بی جوانه ام نشسته روبرو پشت این دریچه های بسته می زنم هوار . . [LEAF_FLUTTERING_IN_WIND] ای بهار ! فریدون مشیری	0	0	3	0	3	irrelevant
اره برای منم پیش میاد که خیلی خوشم بیاد از یه دختری ولی اینکه بخوام زنم بشه اصلا تو مخیله م نمی گنجه [BEAMING_FACE_WITH_SMILING_EYES] مثلا اینو من عاشقشم با اینکه از نظر خیلیا این اصلا رقص نیست	1	1	0	0	3	irrelevant
: من نه پارتنر دارم نه کراش دارم نه عشق نه هیچی نه منتظر کسیم نه کسی منتظر منه.مصداق بارز بهر تماشای جهان امده ،منم :)))	1	1	2	0	3	irrelevant
پارتنر خوب باعث میشه روحت ارامش داشته باشه	2	1	0	1	0	relevant
جدی گفتی [SLIGHTLY_FROWNING_FACE] من درامدم نزدیک 5 تومنه شوهرم درامدش جداس قسط واینام نداریم ولی به زور پیش میبریم [EXPRESSIONLESS_FACE]	2	1	1	1	1	relevant
اگر همسر تابع تمام قوانین اسلام باشه،چرا که نه.اسلام یه پکیج است.تمام قوانین باید اجرا شود تا زیبایی و لطافت این دین دیده شود.	0	0	3	0	3	irrelevant
متاسفانه من نازتو نمی کشم، همونو می زنم تو دهنت.	0	0	3	0	3	irrelevant
ناهید زن منه هیچ جا نمیاد!	2	1	1	1	1	relevant
با این املا سگ زن من نمیشه.	1	0	3	0	3	irrelevant
اقا امان از جو گرفتگی دقیقا صداش مثل رعد و برق کذایی کرمانشاه در اسمان صاف و بی ابر فرداش بگوش میرسه.گفتم اول قرن جدید دو رکعت ورزش و پیاده روی بزنم به کمرم ابتدای رکعت اول سرسیلندر سوزوندم ولی گفتم باید ادامه بدم الان دیگه اتاق تعویضی شدم.اقا دانش بنیان ام به فاک رفت	0	0	3	0	3	irrelevant
کلا دخترا شوهر میکنن همین میشن دیگ خودمونیم .ولی این دوستم کسی بود که همه زندگیشو میگفت بهم.ده سال صمیمی ترین دوستش بودم گرچه اون صمیمی ترین من نبود. حتی نگفت داره عروسی میگیره و دوستامونو دعوت نکرد .	1	1	1	0	3	relevant
شما رو اودوش میزنم اقا مانی	0	0	3	0	3	irrelevant
زن بگیرم از این فامیلای پدرسگ جدا بشم. فامیلای پدرسگ زنم هم به فامیلای پدرسگ خودم اضافه شدن. (میم پیرمرده)	1	1	1	0	3	irrelevant
ببین اصلا این دختره شبیه همسرِ اینده س [FACE_WITH_TEARS_OF_JOY][FACE_WITH_TEARS_OF_JOY][FACE_WITH_TEARS_OF_JOY] عین دافای قبل انقلابه اون موقع هم که همه ازدواجی[ROLLING_ON_THE_FLOOR_LAUGHING] بخدا ادم دلش میخواد سر و سامون بگیره با اینا[FACE_WITH_TEARS_OF_JOY]	1	1	0	0	3	irrelevant
اجی دارم بهت میگم نه الان جیغ می زنم [CLOWN_FACE]	0	0	3	0	3	irrelevant
ادم یک زن مثل ابی داشته باشه دیگه عزراییل نمیخواد، ولی جدی گفتم، بیماری الکلیسم خیلی وحشتناکه و تمام رفتار و افکار رو بهم میریزه، جای فوتبال میخوام پیشنهاد بدم طبق فرامین خداوند عزوجل برنامه ترویج چندهمسری و کودک همسری پخش کنن، چطوره؟	0	0	3	0	3	irrelevant
اگر همسر شما بیمار بشه و تنها راه درمانش داشتن شوهر دوم باشه اجازه میدین؟	0	1	2	1	2	relevant
دوست پسرم که داری، دیگه چی؟	0	1	2	0	3	relevant
دل تنگ توام شعر می نویسم و واژه هایم را کنار می زنم که تو را ببینم شمس لنگرودی	0	0	3	0	3	irrelevant
سوال من اگه از توییتر برم کی دلش برام تنگ میشه؟؟ . . . حدس می زنم جواب همتون [EYES][SMILING_FACE_WITH_TEAR] :"هیچکدوم دلمون برات تنگ نمیشه": هعییی[WOMAN_WALKING][WOMAN_WALKING]	0	0	3	0	3	irrelevant
منم امروز سر بستنی با شوهر خالم قهر بودم [FACE_WITH_TEARS_OF_JOY]	0	0	3	0	3	irrelevant
من اگه شوهرم بکنم یه شوهری گیرم میاد که هرروز میگه عکس قدی بده.	1	1	1	0	3	irrelevant
بخدا اگه پسرای توییتری به اندازه دخترا زیر فیلم رقص لعبتا بگن: ترخدا بیا زن من شو [UNAMUSED_FACE]	0	0	3	0	3	irrelevant
واقعا عمه ها در انتخاب شوهر باید دقت کنن [SAD_BUT_RELIEVED_FACE]	0	0	3	0	3	irrelevant
اکس یعنی پارتنر قبلی، نکست یعنی بعدی	1	0	3	0	3	irrelevant
حالا که تقدیر بر این است که تو همسرِ عزیزِ (من) باشی لطفاً عاشق زن دیگری نباش !!! [WHITE_HEART][HEART_EXCLAMATION][BEAMING_FACE_WITH_SMILING_EYES][BEAMING_FACE_WITH_SMILING_EYES][BEAMING_FACE_WITH_SMILING_EYES] …	2	1	2	1	2	relevant
فرزند دوم 5.1 به دنیا اومد تاریخ تولدش با همسرم یکی بود و دخترم 9.23 با خودم یکی جفتشون هم طبیعی به دنیا اومدن	2	1	0	1	0	relevant
در اخرین روز سال - در اخرین روز قرن - همراه باشیم با زنان ازاده میهنمان که در مقابل ظلم سکوت نکردند و نوروز را دور از همسر و فرزندانشان در پشت میله ها سپری میکنند irpoliticalprisonersvoice	0	0	3	0	3	irrelevant
چندوقت پیش یه داستانی خوندم درباره سربازی که کل پادگان رو برای مرخصی گرفتن بهم ریخت تاخودش رو به مادرش که به زور شوهر دومش میخواست مواد جابه جا کنه برسونه.باخبر سربازی که هم خدمتی های خودش روبرای گرفتن مرخصی کشته دوباره یاداین کتاب افتادم.کی می دونه تو زندگی ادم چه خبره! سربازی	0	1	1	0	3	relevant
راه دور نرو. همسر نازنین زاغری رو بگو.	0	1	2	0	3	relevant
خانمهای محترم، علی الخصوص همسر و مادر گرامی: اون دسته ی بالاسرتون توی ماشین ترمز اضطراری قطار نیست که تا ما سبقت میگیریم اون میگیرید و میکشید!	2	0	3	0	3	irrelevant
: دوست دخترم دانشجوی پزشکیه، حتی دوستامم دارن با این قضیه پز میدن :))	2	1	0	1	0	relevant
اقا یه راهی نیست بدون ازدواج دختر دار بشم؟؟ من دختر دار بشم دیگه به زنم اهمیت نمیدم گناه داره زنی [MOAI]	1	1	1	0	3	irrelevant
تو شرایطیم که یه بار دیگه خمیازه بکشم با پشت دست می زنم تو دهن خودم [FACE_WITH_HAND_OVER_MOUTH][FACE_WITH_ROLLING_EYES]	0	0	3	0	3	irrelevant
از زنم دور شو	2	1	0	1	0	relevant
بین تمام دغدغه های ملت، بین جنگ ها، بین دعواهای سیاسی و اجتماعی، بین افشاگری ها کف تایملاین، من نشستم کیس مورد نظر خودم رو توی نرم افزار همدم انتخاب کردم و درخواست اشنایی دادم [FACE_WITH_TEARS_OF_JOY] هیچ وقت فکرشو نمی کردم که گذرم به سایت های همسریابی بیفته. اصلا قحطی زن و شوهره، یه وضعی [MAN_FACEPALMING_LIGHT_SKIN_TONE]	1	0	3	0	3	irrelevant
نصیب نبود این هیولا که اومد بزور خودشو اویزون ابی کرد با اون پسر اویزون تر از خودش زنیکه خونه خراب کنه زندگی نامه فروزه همسر اول ابی رو بخونید	0	0	3	0	3	irrelevant
یکی با من چت کنه از اول یه جور بنویسه تغییرش بده انگار دارم با یکی دیگه حرف می زنم نمت اصن	0	0	3	0	3	irrelevant
این شوهر شیوا صفایی هم خیلی تایپ منه، بنده همین رو می برم.	1	1	0	0	3	irrelevant
شما یک خانواده دارید، اون هم خودت و شوهرت و بچه هاته، والسلام	0	1	2	0	3	relevant
: من تو دنیای موازی، تو کلبه چوبی مون نشستم جلوی شومینه و دارم بلندبلند برای شوهرم و دخترهام کتاب می خونم :))	1	0	3	0	3	irrelevant
بالاخره همسر تراویس که هست بعدشم تو یه نیگا نیستی ابروی کاکا سیاه ها رو بردی شرم بر تو باد [MOAI]	0	1	2	0	3	relevant
دوا و دکترو سونو و جراحی و… همه ش فیلم بود ؛ خودمو زده بودم به موش مردگی که نرم خدمت خاندان شوهر [RELIEVED_FACE][VICTORY_HAND] پ ن : مرگ [SKULL_AND_CROSSBONES] می ارزه به دیدن این جماعت	2	1	1	1	1	relevant
زنم رو بدید برم من کوش؟	1	0	3	0	3	irrelevant
قسمت عمده ای شون مردسالارن با بیست درصدشون میتونم دوست باشم و تعداد انگشت شماری هست که بتونم به عنوان پارتنر انتخاب کنم	1	0	3	0	3	irrelevant
تو دسشویی داشتم مسواک میزدم شوهر خالم درو باز کرد برگشتم با دهن کفی گفتم عیه؟ we are one exo dont fight the feeling exo	0	0	3	0	3	irrelevant
: خانمممممم هااااااا بیاین به من توجههه کنین dont fight the feeling exo	0	0	3	0	3	irrelevant
: به همسرم گفتم روز عروسی ریشاشو بزنه همه چی کنکل [FACE_WITH_TEARS_OF_JOY][WOMAN_SHRUGGING]	2	1	0	1	0	relevant
: من یه قرمه سبزیم یاد بگیرم وقت شوهرم فرا میرسه [MOAI]	1	0	3	0	3	irrelevant
صاحب؟!!! چه فکر اشتباهی … دوست عزیز … متوجه حرفم نشدید فکر کنم … هیچ کسی صاحب کس دیگه ای نیست ولی شما زن ها به راحتی میتونید هر گونه گفتار و رفتاری با همسرتون داشته باشید … ولی مرد نمیتونه؟!! شما خوبید، ما مردا بد؟؟؟	0	1	1	0	3	relevant
من چشام اینقدر حساسه ابجیم خط چشم میکشه برای خودش چشم من اشک میاد حالا بگذریم کلا چندشم میشه کرمم نمیزنم به دستم [UPSIDE_DOWN_FACE][UPSIDE_DOWN_FACE][UPSIDE_DOWN_FACE][UPSIDE_DOWN_FACE] میگفتی ازدواج کنم راحتتر بودش بابا یا ببرم سرکار یدی	1	0	3	0	3	irrelevant
من خودم کیک دوس ندارم، حتی هنوز نچشیدم ازش [GRINNING_FACE_WITH_SMILING_EYES] ولی همسرم عاشق کیکه	2	1	2	1	2	relevant
زن نمی تونه مقابل بقیه زن ها برقصه، حضور در کنار مردی غیر از شوهرش هم که بدون اجازه ممکن نیست، در نتیجه انتقال هنر رقص از فردی به فرد دیگر تقریبا احتمالش صفره و زنه راهی برای یادگیری رقص نداره و رقصیدن برای شوهر حتی در سکوت هم کنسله. (از کلمه رقص خیلی استفاده کردم)	0	0	3	0	3	irrelevant
[HAND_WITH_FINGERS_SPLAYED_MEDIUM_LIGHT_SKIN_TONE] خانم من[HAND_WITH_FINGERS_SPLAYED_MEDIUM_LIGHT_SKIN_TONE] خانم من [HAND_WITH_FINGERS_SPLAYED_MEDIUM_LIGHT_SKIN_TONE]	2	1	2	1	2	relevant
فقط و فقط چون قانونمون قانون نیست و من زنم	0	0	3	0	3	irrelevant
وقت شوهر کردنته ها بعد از سربازی باید بریم برات جهیزیه جور کنیم	1	1	2	0	3	irrelevant
ن بابام خریده ن دوست دخترم نه خودم ن کل خاندانم فقط عکس! قشنگ بود گفتم بزارم اینجا	2	0	3	0	3	irrelevant
این همسر رضا ربعی چقدر شکل میمونه احتمالا از غصه پادشاه نشدن شوهر الدنگش به این روز افتاده	0	0	3	0	3	irrelevant
مکر یه زنِ یهود که همسر یه اخوند هست>>>>>>>>>	0	0	3	0	3	irrelevant
: به دخترانتان بگوید برای رسیدن به ارزوهایشان (تلاش کنن) نه شوهر.	0	1	1	0	3	irrelevant
خانمتون اکانت در توییتر دارنند؟ اگر دارنند بیان اینجا دور هم باشیم بگیم و بخندیم و با منزل اشناشویم چرا شما دیکتاتور هستید، [BEAMING_FACE_WITH_SMILING_EYES]	0	1	1	0	3	relevant
دیگه داری یه کاری میکنی دو تا تیر برقم برا تو و زنت کنار بذاریم [SMILING_FACE_WITH_SUNGLASSES]	0	0	3	0	3	irrelevant
همسر دوم هم انگار داره مد میشه [FACE_WITH_SYMBOLS_ON_MOUTH]	0	1	1	0	3	relevant
منطقی بود [FACE_WITH_TEARS_OF_JOY][FACE_WITH_TEARS_OF_JOY] علی عزیزم[PLEADING_FACE][RED_HEART][FACE_WITH_TEARS_OF_JOY] امشب دیگه تموم می شه تا یکی دو هفته دیگه توییت های فاخر می زنم برات	0	0	3	0	3	irrelevant
وقتی تا الان نزدن از این به بعدم نمی زنم [ROLLING_ON_THE_FLOOR_LAUGHING][FACE_WITH_TEARS_OF_JOY][OTTER]	0	0	3	0	3	irrelevant
تو این مسابقه ارزشمند عصر طلایی عنصر مزاحم، زایدو اضافی کسی نیست جز احسان علیخانی اخه مرد تو چرا اینقدر حرف مفت میزنی؟ مسابقه رو به لجن می کشی!	0	0	3	0	3	irrelevant
امروز فامیل پس از اینکه تهدید کرد سال دیگه عید باید همسر گزیده باشم فرمود که تخصص هم حتماً برم دندون. روز بدی بود :))	1	0	3	0	3	irrelevant
بنظرت یه زن 35 ساله با ماهی 100 ملیون درامد میاد تو یه گروه زپرتی تلگرامی دنبال پارتنر بگرده؟؟	0	0	3	0	3	irrelevant
حرفایی که به بقیه می زنم و به خودم می زدم و اجرا می کردم خدا شاهده خیلی جلو بودم خیلی مثلا اینترن بودم	0	0	3	0	3	irrelevant
یک همسر از بک شهر دور خیلی جوابه	1	1	0	0	3	relevant
دیگه ادم چه موقع باید ازدواج کنه، سن من و بقیه جوونا داره می ره بالا گرونی بیکاری سربازی و هزارتا مانع دیگه برا ازدواج من خود سنم از یه جایی بره بالاتر دیگه قیدش رو میزنم	1	0	3	0	3	irrelevant
حس میکنم پارتنر زبانم از خودم شوت تره و صرفا چون جوگیر شده میخواد بخونه. بخت سیاهم.	0	0	3	0	3	irrelevant
الان این شوهر منه؟ [PENSIVE_FACE][BROKEN_HEART]	0	1	2	1	2	relevant
: نمیدونم خانمم چرا با من سرد شده و سکس نمیکنه مطمینم با کس دیگه هم نیست.	2	1	1	1	1	relevant
یعنی همینکه از نظر جنسی یا مالی به یه توانایی برسن میگن خیلی خب وقتشه بره ازدواج کنه و حالا یا بریم یکی رو پیدا کنیم یا طرف فکر میکنه پس عاشق شدن و علاقه داشتن باعث میشه همه چی حل بشه و بریم زندگی کنیم درصورتی که من اصلا نمیدونم زندگی متاهلی چجوری و چه مهارت هایی نیاز داره	0	1	1	0	3	relevant
اخه نه ظرف میشوری نه غذا نه سالاد مگرنه که خوش به حال شوهرت	0	1	0	0	3	relevant
نه دیگه درسمون تموم شد احتمال این که بتونیم مستقل بشیمم کمتر از 1درصده، مهاجرتم روی میز نیست، تا رسیدن شوهر گرامی درخدمت خانواده هستیم [WOMAN_WALKING_MEDIUM_LIGHT_SKIN_TONE]	1	0	3	0	3	irrelevant
بزور میخوان زنم بدن من زن نمیخوام عروس به مادرم بدن من زن نمیخوان [MAN_DANCING][WOMAN_DANCING][MAN_DANCING][WOMAN_DANCING]	1	1	1	0	3	irrelevant
بخاطر همینه من دوست ندارم دوست پسرم،دوستِ دختر داشته باشه چتونه اخههههه؟؟؟	2	1	1	1	1	relevant
: همسر قشنگم تو چطوری؟	2	1	0	1	0	relevant
شوهرت چاق دوست داره	0	1	2	0	3	relevant
واکنش های منفی که در ابتدایی صحبت همسر نشان میدیم او رو سر لج کردن میاره و هرگز با اصلاح و رد پیشنهادش توسط ما موافقت نمیکنه سیف	2	1	1	1	1	relevant
من همونی ام که وقتی می خوان برن خرید منو به زور می برن و کلی غر می زنم اما کسی اول از همه خرید می کنه و بیش تر از همه خرید می کنه کیه؟ -افرین من=)))	0	0	3	0	3	irrelevant
به درجه ای از عرفان رسیدم که خودم مشاور خودم شدم. خودم برای خودم حرف می زنم بعد راهکار ارایه می کنم	0	0	3	0	3	irrelevant
ب مولااا…همینجوری پیش بره ی قانونی میاد ک زن ها در کنار شوهر میتونن ی دوس پسرم داخل خونه داشته باشن و من دیگه ازدواج نمیکنم [SMILING_FACE_WITH_SUNGLASSES]	1	1	1	0	3	relevant
والا دوس پسر من بود نمیدونم کی شد شوهر شما [UNAMUSED_FACE] super junior kings superjunior	2	1	1	1	1	relevant
روی اسم شمال حس مالکیت دارن و متعصبن، انتظار برای نبریدن سر همسر و دختر توقع زیادیه.	0	1	1	0	3	relevant
فکت : پسری که رفیق عادی یه دختر میشه درواقع توانایی و جذابیت کافی برای تبدیل شدن به پارتنر اون دختر رو نداره.	0	0	3	0	3	irrelevant
اگه عمه و شوهر همه باشن که راحته [FACE_WITH_TEARS_OF_JOY] در زدنم نمی خواد	2	0	3	0	3	irrelevant
یعنی تو تایم لاین مختلط میتونم توییت بزنم یا بذارم سانس اقایون؟	0	0	3	0	3	irrelevant
سلام به من ربطی نداره تو مغز طرف چی میگذره ولی اجازه بدید چیزی که تو مغز پارتنرم یا دوس دخترم یا زنم میگذره به من ربط داشته باشه	2	1	2	1	2	relevant
هرکی برای خودش یه ملاک هایی برای انتخاب همسر داره پسره هم ملاکش این بوده گوهخوریشم به خودش اومده	0	1	2	1	2	relevant
چون شوهر پیدا نکردم، نه.	1	0	3	0	3	irrelevant
قطعا در اون صورت الان خانه ی شوهر بودم.	1	0	3	0	3	irrelevant
در یک مسیله زیبا، یه بچه ی 6 ساله داشت برام توضیح میداد بچه از روده انسان( واژن منظورش بود که بهش اینو نگفتن ) بیرون میاد و در ادامه میگه که تو شوهر کنی میفهمی اینا چیه بچه ها شوهر کردم فهمیدم به شما هم میگم اینا چیه [FACE_WITH_TEARS_OF_JOY][FACE_WITH_TEARS_OF_JOY][FACE_WITH_TEARS_OF_JOY][FACE_WITH_TEARS_OF_JOY][FACE_WITH_TEARS_OF_JOY][HANDSHAKE_MEDIUM_LIGHT_SKIN_TONE]	1	0	3	0	3	irrelevant
همسرم و دخترم کرونا گرفتن و به طرز عجیبی من خوبم که مراقبشان باشم! امشب تا صبح باید مدام تب ارغوان رو چک کنم که خطرناک نشه باز. پارسال عید هم درگیر بیمارستان بودیم، خدایا ما دیگه طاقت اورژانس و بستری رو نداریم [PERSEVERING_FACE]	2	1	0	1	0	relevant
بابا انقدر تو عید دیدنی اصرار نکنید من بخورم [FACE_WITH_TEARS_OF_JOY] هم رژیمم هم جوش می زنم…	0	0	3	0	3	irrelevant
خیلی دوست دارم بگم کاری که نوشته کنارش «بابا»، ولی انصافم میگه کار همسرتون خیلی بهتره!	0	1	0	0	3	relevant
بده دارم واست شوهر پیدا میکنم؟ [UNAMUSED_FACE]	1	0	3	0	3	irrelevant
شوهرت خبر داره میایی اینجا همچین چیزایی می نویسی؟! [BACKHAND_INDEX_POINTING_DOWN]	0	1	1	0	3	relevant
نه دیگه تورو باید به همسر خوندگی بگیریم	1	0	3	0	3	irrelevant
دستتو از موهای همسر زیبای من بردار*-* خودم میخام دستمو تو موهاش کنم*-*	2	1	0	1	0	relevant
نوشته: "به اولین پناهنده اوکرایینی در خانه خودمان پناه دادیم. مستقیم از کیف میاد ولی متاسفانه یک کلمه روسی و اوکرایینی بلد نیست. بچه باحالیه و دایما سعی میکنه با دخترام معاشرت کنه و هنگام دوش گرفتن به زنم کمک میکنه. واقعا اهل کُمکه…"	0	0	3	0	3	irrelevant
: خطاب به همه شماهایی که تنها و بدون پارتنر مهاجرت کردید: واقعا خیلی کار سختی انجام دادید و عجب پوست کلفتی دارید!!!	0	1	1	0	3	relevant
تا اون موقع دوتا شوهر کردم	1	0	3	0	3	irrelevant
اخ از این چس بازیای اول ازدواج=))))) بابا سگ نگا نمیکنه شوهر تورو جمع کن خودتو	0	1	1	0	3	relevant
اصلن من موندم شوهرت واسه چی تو رو گرفته!؟ [FACE_WITH_TEARS_OF_JOY]	0	1	1	0	3	relevant
اشتباهه. رابطه ی خوب رو میسازن پارتنر خوب رو پیدا میکنن چون ادما تغییر نمیکنن و ادمی که بخاطرتو تغییر کنه ادم تو نیست	0	1	0	0	3	relevant
من سنم از پارتنرم بیشتره ، همیشه بم میگه این خیلی خوبه درگیر حواشی نیستی، غر نمیزنی و گیر خرید و اهداف کوچیک نیستی. بهش کمک کرذم که مستقلتر باشه چون خرج اضافی براش نمیتراشم بجاش پول دستمون میاد سکه میخریم که بعدش زمین بخریم :)	2	1	0	1	0	relevant
واسه اولین بار دیشب قبل از دخترم و شوهرم خوابیدما بیدار شدم خونه رو ترکوندن این دونفر. جنگ بود انگار	2	1	1	1	1	relevant
یعنی شما میگی زن شوهرداری ک اسیر کردن این عربهای وحشی میان ازش می پرسن زنم میشی اونم میگ بااجازه ی بزرگترا بلهههههه؟ امیدوارم شوخی باشه حرفتون!	0	1	1	0	3	relevant
حس میکنم بعضیا خیلی درگیر ماشینو پول طرفن دیگه اخلاقیات از بین رفته…گاهی براشون مهم هم نیست طرف با کس دیگس یا حتی همسر داره	0	1	1	0	3	relevant
یکی از فانتزیام اینه که ی پارتنر طراح لباس داشته باشم	1	1	2	0	3	irrelevant
همین سیزده روزم به سختی کارشو بیخیال شده شوهرم، اگه به دله من بوداصلاخونه نبودم، میزدم به ایرانگردی تموم میشد، جهانگردی [PENSIVE_FACE]	2	1	1	1	1	relevant
همینی که کوت کردی شوهر دوست نیست؟ تا ارنج عسل و فلان	0	0	3	0	3	irrelevant
همه ی زن و شوهرا یه عکس اینشکلی دارن که دارن به هم عاشقانه نگاه میکنن	0	1	0	0	3	relevant
اگر بابای همسرم زنده بود می تونستیم کوول ترین روابط عروس و پدر شوهر دنیا ر داشته باشیم. در این حد که حوصله ام سر می رفت واسم فال می گرفت :(	2	1	2	1	2	relevant
جناب اقای رییسی مکررا از دخالت همسر گرامی تان در امور مختلف دولت شنیده می شود. اگر خلاف واقع است،اعلان فرمایید تا خیال ملت اسوده شود و اگر درست است،در راستای شفافیت،مسیولیتشان را اعلام کنید. ضمنا ایا درست است که بزرگان،شما را از دخالت اعضای خانواده در دولت،نهی کرده اند؟	0	1	1	0	3	relevant
اینکه هوا دونفره ست و فلان کسشره اما این کسشر رو هوای الان انزلی بسیار ناکسشره. این هوا هوای زید داشتن نیست، هوای شوهر داشتنه	1	1	0	0	3	irrelevant
منه بدبخت دوست دخترم واسم نود نمیفرسته میره واسه رفیق دخترش میفرسته [PENSIVE_FACE][PENSIVE_FACE][PENSIVE_FACE][PENSIVE_FACE] چه برسه به رفیق دخترم منم از این رفیقا میخوام[MAN_FACEPALMING][MAN_FACEPALMING][MAN_FACEPALMING]	2	1	1	1	1	relevant
پس سعی کن چند تا دوست دخترو کله شو بترکونی تا دستت بیاد این بلا سر همسر عقدیت نیاد [FACE_WITH_HAND_OVER_MOUTH]	0	1	1	0	3	relevant
نه خودخواه و خودبین نیست واقعا لوسه خیلی بچه خوبیه ولی از حوصله من خارجه دوست خوبی می تونه باشه برام ولی پارتنر به هیچ وجه	1	1	1	1	1	relevant
میشه این خانوم زن من بشه؟ :((((	1	1	2	0	3	irrelevant
هه من شوهررر دارم شما ندارییین خاک برسرتووون	2	1	0	1	0	relevant
شوهر خالم به من : پیرسینگ چرا انداختی ، منو یاده نعل اسب میندازه !! به توچه اخه	0	0	3	0	3	irrelevant
دوست پسر منم منتظرمه بریم بیرون	2	1	2	1	2	relevant
متاسفانه نمیتونم با زیدم عکس بذارم و بگم بهترین اتفاق سال 1400 ام بوده چون بگا میریم:(	2	1	0	1	0	relevant
کودک همسری میشه خب [FACE_WITH_TEARS_OF_JOY][FACE_WITH_TEARS_OF_JOY]	0	1	1	0	3	relevant
ببین محمد رو به عنوان پارتنر بیار تو منم فرانو بیارم براش غریبی نکنه [FACE_WITH_TEARS_OF_JOY]، جدی میشه ها، میخندیم[FACE_WITH_TEARS_OF_JOY]	0	0	3	0	3	irrelevant
اره من همینجوریش تو سطح بین المللی ابرو ندارم حالا فیلمم پخش کنن تازه زنم ندارم بخواد طلاقم بده [OTTER]	1	0	3	0	3	irrelevant
میای زن من شی [DROOLING_FACE][FACE_WITH_TEARS_OF_JOY][FACE_WITH_TEARS_OF_JOY][FACE_WITH_TEARS_OF_JOY][FACE_WITH_TEARS_OF_JOY] والا منم ماکارونی بلدم ولی اینجوری نمیشه چیکار میکنی فوت و فنتو بگو[FACE_WITH_TEARS_OF_JOY][FACE_WITH_TEARS_OF_JOY]	1	1	0	0	3	irrelevant
: من زنم، من ناموس کسی نیستم. زن ناموس کسی نیست زن ستیزی زنان زنکشی زن اگاهی ازادی	0	0	3	0	3	irrelevant
خب کمتر از 10 دقیقه مونده به شروع روزای کذایی که تا 6 ماه به جای نیم ساعت، یک ساعت و نیم با پارتنرم اختلاف ساعتی دارم :)	2	1	0	1	0	relevant
من وقتی اشتباه می زنم توو خرید: خب خوبه حالا یه مدل اینجوریم داشته باشم	0	0	3	0	3	irrelevant
خب اغلب اشتباه میکنن چون به ازدواج بچه های زیر هجده سال میگن کودک همسری واینا جفتشون هم بچن	0	1	1	0	3	relevant
سنگ تمام همسر مدافع بارسلونا پس از فتح ال کلاسیکو بارسای ژاوی که این روزها روی فرم است تنها سه روز پس از پیروزی بر گالاتاسرای در استانبول سرحال و پرانرژی برابر ریال قرار گرفت و به راحتی هم پیروز شد. متن کامل درسایت:	2	1	0	0	3	relevant
بچه 4 ساله داشت با نامزد داییش حرف میزد، گفت تو خیلی خوشگلی، عروسی کردی؟ -نه عزیزم - ناراحت نباش شوهرتم هنوز عروسی نکرده [RELIEVED_FACE]	0	1	0	0	3	relevant
من میگم کودک همسری همونفدر حال بهم زنه که کودک فاحشگی و استفاده ابزاری از چهره و بدن کودک	0	1	1	0	3	relevant
دفعه دوم: همسر در تصادف اول میمیره، بچه در تصادف دوم	0	1	2	0	3	relevant
: امروز گفته اگه اجازه بدی نرم مدرسه هشت ساعت برات پیانو می زنم	0	0	3	0	3	irrelevant
یه چیز جالبی متوجه شدم که اینجا بعد از اینکه کسی فوت میکنه همه ی اموالی رو که تو وصیت نامه مشخص نکرده به صورت مساوی بین همسر و بچه ها تقسیم میشه. تو ایران ولی به همسر ارثی نمیرسه درسته؟	0	1	1	0	3	relevant
من بلدم هنوز شوهر گیرم نیومده. دلتو صابون نزن [FACE_WITH_TEARS_OF_JOY]	1	1	1	0	3	irrelevant
متاهلی همین بدیا رو داره [FACE_WITH_TEARS_OF_JOY]	0	1	1	1	1	relevant
همین ک شوهر داره یعنی افتخار میکنه ک شوهر داره و فکر میکنه بقیه حسودی میکنن مگ حسودی داره اخه؟ [NEUTRAL_FACE]	0	1	1	0	3	relevant
زن من غلط بکنممم اهمیت ندم فقط زیاد توییتر نیومدم این چند وقت	0	0	3	0	3	irrelevant
بهش بگو چون عشق اول و اخرم شوهر تو بود	0	1	1	0	3	relevant
مطمنم اگه ماشین و خونه داشتم حتما زیدم میشدی [RING][TULIP][REVOLVING_HEARTS]	1	1	1	0	3	relevant
بالاخره باید یه طرف باحال باشه باقی بچه ها خودشون باحالن شوهر عمشون نچسب حالا برا شما فرق میکنه	0	0	3	0	3	irrelevant
میخوام نرم افزار همدم نصب کنم یه شوهر گیر بیارم انقدر بنر تبلیغاتی ازش دیدم کاملا توجیح شدم شوهر خوبه [FACE_WITH_TEARS_OF_JOY][FACE_WITH_TEARS_OF_JOY][FACE_WITH_TEARS_OF_JOY]	1	1	0	0	3	irrelevant
تو سال جدید حداقل سه تا تتو می زنم.	0	0	3	0	3	irrelevant
دوست دخترم زدم تو بلک لیست	2	1	1	1	1	relevant
شوهر دوس پسر چرا	0	1	2	0	3	relevant
والا جواب پیغاماشو نمی دم دیر سین می کنم تیک می زنه، می زنم تو حالش کلا نذاشتم ذره ای جدی بشه دیگه باید بفهمه	0	0	3	0	3	irrelevant
ولی با خانواده ی همسر سفر رفتن واقعا سخته هر قدرم ک خفن و گرم و خوب باشن [VICTORY_HAND_LIGHT_SKIN_TONE][OTTER]	2	1	1	1	1	relevant
جونم همسر امروز چشامو نورانی کردی با زیباییات کویینم	2	1	0	1	0	relevant
از اولی ک توییتر داشتم زیدم داشتم [ROLLING_ON_THE_FLOOR_LAUGHING][ROLLING_ON_THE_FLOOR_LAUGHING]	2	1	2	1	2	relevant
گگگگگ چیه روت نمیشه بگی شوهرم مردعنکبوتیه!	0	1	2	0	3	relevant
به روایت همسر شهید انتظار حمید ان روز با حمید گرم صحبت بودیم که او گفت:«توقعاتت را از من بگو» برایش گفتم، گفت:«بنویس. نوشتم. بعد خودش شروع کرد و من جملات او را نیز نوشتم. خواسته های او این بود : شهید قلنبر	0	1	2	0	3	relevant
امروز رفته بودم بیرون دقیقا دیدم این پسر دخترای 19 الی 20 ساله( بهشون همین رنج سن میخورد) بیرون کافه تو بغل هم جلوی همه لب گرفتند [UNAMUSED_FACE] بعد همونجا بود که گقتم لاشی ها من هنوز تو این سن تجربه پارتنر داشتن ندارم شما لب میگیرید[FACE_WITH_RAISED_EYEBROW] .	1	1	2	0	3	relevant
رفتار های شوهر هاشون تا غیبت های کسشعر پشت اقدس خانم حرف زدن وقتی خیلی دقیق فک می کنم این اولین جایی بود ک فهمیدم رفتار زن ها با مرد ها فرق داره!	0	1	2	0	3	relevant
تفکر مرد ایرانی نسب به همسر : زنش باید شیکمشو پر کنه تخماشو خالی کنه!	0	1	1	0	3	relevant
: رابطتتون با دوست صمیمی جنس مخالفتون یجوریه که من با شوهر ایندم اینطوری نیستم	1	0	3	0	3	irrelevant
از قیافه تخمی حال بهم زن تو بهتره	0	0	3	0	3	irrelevant
از قیافه حال بهم زن تو بهتره	0	0	3	0	3	irrelevant
: خانم من از عکستون خیلی خوشم امده [GRINNING_FACE_WITH_SWEAT][ROSE] اینو واستون درست کردم امیدوارم قابل بدونید[BEAMING_FACE_WITH_SMILING_EYES][SMILING_FACE_WITH_SMILING_EYES][ROSE][ROSE][ROSE]	0	0	3	0	3	irrelevant
یک هشتم به همسر میرسه.	0	1	2	0	3	relevant
: چرا نمیشه همزمان هم زن داشت هم شوهررر من هر دو رو میخواممم	1	1	0	0	3	relevant
من مشکل تکلم دارم یعنی کلا حذف نمی زنم صوتی فقط تایپ	0	0	3	0	3	irrelevant
چون همسرم میگیرن واسم، زیاد درجریان قیمتش نیستم متاسفانه.	2	1	2	1	2	relevant
اینکه دوس دارم زنم 15 سال ازم کوچیکتر باشه مشکلی داره؟؟	1	1	2	1	2	relevant
فکرشو بکن با همون دختر دایی بچه دیروزی که تو بغلم بزرگ شد و صبح تا شب تو سر و کله ش میزدم و سر به سرش میذاشتم و شوخی میکردیم با هم، الان که نامزد کرده باید بشینم تعارف تیکه پاره کنم و رسمی تر حرف بزنم! ازدواج خر است. خیلیییی هم خره	2	1	1	0	3	relevant
به روایت همسر شهید انتظار حمید ان روز با حمید گرم صحبت بودیم که او گفت:«توقعاتت را از من بگو» برایش گفتم، گفت:«بنویس. نوشتم. بعد خودش شروع کرد و من جملات او را نیز نوشتم. خواسته های او این بود : شهید قلنبر رشتو	0	1	2	0	3	relevant
بچه ها پریود ترکری که بشه پارتنر اد کرد و رایگان باشه سراغ دارید؟ برای ایفون**	2	1	0	1	0	relevant
مثل من همسر عزیزم اینجان و من نمیتونم با بعضیا در خور شخصیتشون صحبت کنم ،مدام باید مهربان و اروم باشم [GRINNING_FACE_WITH_SWEAT]	2	1	0	1	0	relevant
اخه مرد من حتی اسمتو نمیدونم نمیدونم چیکاره ای چند سالته اصن قیافت چه شکلیه چی میگی	0	0	3	0	3	irrelevant
لامپ جلو در خونه م وقتی کلیدشو می زنم 16 ثانیه بعد روشن میشه :/ کسی میدونه چرا اینطوریه؟	0	0	3	0	3	irrelevant
بعضیا قبل از شوهر کردن مو رنگ نمیکنن…بد میدونن	0	0	3	0	3	irrelevant
دو تا خبر بد 01/01/01 [HOLLOW_RED_CIRCLE]یه سرباز 4 تا از هم خدمتی هاشو تو پادگان کشته [HOLLOW_RED_CIRCLE] مرد 25 ساله رو صورت همسر 17 سالش اسید پاشید	0	1	1	0	3	relevant
هر چه که ماترک مرحوم باشه به نسبت تقسیم میشه .میرسه به همسر هم	0	0	3	0	3	irrelevant
فک نکنم از پارتنر خیالی بشه حامله شد!میشه؟ احتمالا پشمام بریزه	2	0	3	0	3	irrelevant
ریدم تو زندگی که پارتنر درس خوندن ندارم .	1	0	3	0	3	irrelevant
1-اتقوالله صوفوا دینکم بالورع 2-قل اعوذ بالله السمیع العلیم من همزات الشیاطین و اعوذ بالله ان یحضرون. الله هوالسمیع العلیم. 3-همسرم! چیزی را مخواه، جز انچه خدا می خواهد برای انکه خدا می خواهد و از چیزی نهی مکن مگر انچه خدا نهی کرده است. برای انکه خدا نهی کرده است.	0	1	2	0	3	relevant
یه سوال جدی: قیافه چه قدر تو انتخاب همسر براتون اهمیت داره؟؟ منشن پلیز	0	1	2	0	3	relevant
من: یه حرفی رو می زنم، با خودم دابل چک هم می کنم که حرف اشتباهی نیست. یه ربع بعد بازم من: این چه کسشری بود تو گفتی؟	0	0	3	0	3	irrelevant
عیده و مهمونی لباس تنگ و کوتاه پوشیدن همسر جلوی مهمونا. دزدکی عکس گرفتنم. دیدزدن مردای مجلس و راست کردن من و اونا. البته گاهی هم سعی میکرد لباس رو مرتب کنه و بکشه پایینتر که کمتر دیده بشه. شایدهم برای جلب توجه بیشتر این کارو میکرد. خلاصه عید شده چشمتون هیز و کمرتون پر اب	2	1	1	1	1	relevant
تو ددی کسی نیستی پارتنر خشن و مهربون منی	2	1	0	0	0	relevant
میگم که تام هاردی نمیخواد منو به همسری برگزیند!؟ :((	1	1	2	0	3	irrelevant
[PEOPLE_HUGGING][RED_HEART]اخ من بفدای شوهر بخشندم [ROLLING_ON_THE_FLOOR_LAUGHING]	2	1	0	1	0	relevant
دارم به چند همسری فکر میکنم، ببینم راهی داره	0	1	2	1	2	relevant
والا همسر منم 10 داره منم 2 دارم کم میاریم! درگیر یه سری مسایل درمانی شدیم یهو دیدیم 4 میلیونمون نیست! ماشین خراب شد 2 رفت! الان 6 ماه سال گذشته 40 میلیون این منطقه که هستیم رهنش بالاتر رفته و خدا به داد سر سال و تمدید برسه که لابد باید 60 داشته باشیم ! تو تخیل سیر میکنن!1/	2	1	1	1	1	relevant
عکس های بچگی و طفولیت خاندان همسر رو از خود اعضای اون خاندان بهتر شناسایی می کنم. [ROLLING_ON_THE_FLOOR_LAUGHING][ROLLING_ON_THE_FLOOR_LAUGHING]	2	1	2	1	2	relevant
من بدترتم زن.. امروز کفتر بهمون رحم کرد یه تویت بزن منشن بزارم برات	0	0	3	0	3	irrelevant
اقا بی ماشینی واقعا بده! انگاری فلجی. امروز 40 خوردی پول کرایه دادم. با 60 تومن بنزین بزنم قشنگ پنج روز می تونم تو شهر بچرخم!	0	0	3	0	3	irrelevant
چقدر همه چی سنگین بود بزور حرف میزدم نگاه این زن تو چشام واقعا دردناک و سنگین بود برام پر از گریه بودم زمان کند میگذشت	0	0	3	0	3	irrelevant
[FACE_WITH_TEARS_OF_JOY][FACE_WITH_TEARS_OF_JOY][FACE_WITH_TEARS_OF_JOY] خدا وکیلی زن منم این رنگی کنه منم چپ چپ نگاهش میکنم	2	1	1	1	1	relevant
در ایران مهریه و یک هشتم اموال به همسر میرسه. یکی از دلایلی که من با حذف مهریه مخالفم همینه. دوست ما بچه هاش بیرونش کردن عملا از خونه اش.ولی مهریه اش رو ک گذاشت اجرا دادگاه حساب کرد اندازه همون خونه شد و خونه رو دادن بهش	0	1	1	0	3	relevant
تورو که نمیگم همسرم اونا لیاقت ندارن [LIGHT_SKIN_TONE][WHITE_CANE][LOUDLY_CRYING_FACE]	2	1	0	1	0	relevant
منم میخوان فقط تو خونه باشم با گربه م و زیدم، تف تو عیدو مهمونی و فیونا، تفففففففففففففففففففففففففف	2	1	0	1	0	relevant
مرد و زنم مکملن و خودشون تنها نمیتونن بچه دار شن	0	1	0	0	3	relevant
گوه نخور من به پارتنر ایندم متعهدم	1	1	0	0	3	irrelevant
: بچه ها پریود ترکری که بشه پارتنر اد کرد و رایگان باشه سراغ دارید؟ برای ایفون**	2	0	3	0	3	irrelevant
اگر کسی برم کراش داشته باشه اینقدر غر می زنم تا نظرش عوض شه	1	1	0	0	3	irrelevant
گفتند زنت در خانه است گفت به زنم چه گفتند اش در سریال ها در حکم صیغست گفت بماچه گفتند ریدم دهنت بی ناموس کچل گفت به شما چه جاکش های فوضول و بدین سان دعوای شدیدی در گرفت . لطفا مثل ملا انسان دایورتی نباشید	2	1	2	1	2	relevant
ازدواج میکنی حامله میشی [FACE_WITH_TEARS_OF_JOY] به مناسبت بچت شوهرت برات ماشین میخره به ترتیب	0	1	0	0	3	relevant
اونا فقد میتونن دوست پسر باشن شماها شوهرید [FACE_WITH_TEARS_OF_JOY]	2	1	0	1	0	relevant
اگه بابای بچم دست باشع بنظرتون بچم چ شکلی میشه؟؟؟؟	1	0	3	0	3	irrelevant
از همسرتون؟	0	1	2	0	3	relevant
چیزی که این طرف اب ها واقعن دردناک است این است که وقتی زن ایرانی یا افغانستانی پایش به این ور اب ها برسد، تمام گذشته خود شان و محبت هایی که بهشان شده را فراموش میکنند. به این علت است که عده بسیار کمی جرات میکنند از انجا کسی را به عنوان همسر بیارند این ور اب.	0	1	1	0	3	relevant
خانمای قری دقت کنین الت مردانه فقط برای خودتون جذابه برای دلجویی بر ندارین طرحشو بندازین روی شام شوهرتون	0	1	2	0	3	relevant
خیلی وقت بود از شوهرم عکس نذاشته بودم، بهرحال فردا خودش میاد [RELIEVED_FACE]	2	1	2	1	2	relevant
شهبانو به غلط زنگی نام خود نهد" شهبانو " طرف شوهر و دو فرزند خود را کشت، کشور رو تسلیم شکنجه گران کرد، امیران ارتش را به جوخه های اعدام داد، ایران ازاد رو تبدیل بخاکستر اباد کرد و حال این علیا هرزه "شهبانو" انگار باید استالین و هیتلر و پوتین بگن این زنگ " فرشته صلح و ازادی است	0	1	1	0	3	relevant
بگو بیاد بگیره شوهر نیست که.	1	1	0	0	3	irrelevant
مذخرف همیشگیه… بخاطر اینکه همسر هم راضی باشه از تایم تماشای فصل 6 پیکی بلایندرز زدم که به اتفاق هم این مذخرف رو ببینیم.	2	1	1	1	1	relevant
متاسفانه صرفا خانه داری تصمیم دوطرفه نیست. خیلی وقتها در خانه داری هم اجباره، مردهایی که به همسرشون اجازه کار به دلایل مختلف رو نمی دنپ.حتی مراجعینی داشتم که حق ویزیت رو نداشتند ولی زن باید خانه دار باشه. زنان فعال خانه دار هم زیاد هستند .حرف من بیشتر فرایند اقتصادی هست	0	1	1	0	3	relevant
به زن شوهر دار تعلق نمیگیره. چه معنی داره زن شوهر دار سیگار بکشه اصن.	0	1	2	0	3	relevant
/ مرد مسلمان استفاده کنن و بگن این شوهر ابیوسیوه… ولی تهش باید واقعا ببینیم قانون چیه. و از لحاظ منطقی ایده ی کسخل بهتره، ولی این چیزا رو نمیشه سریع عوض کرد قانونشونو…	0	1	1	0	3	relevant
اقااا یک سوال تولد یک پسریه که خیلی باهاش حال میکنم ولی باهم صمیمی نیستیم بنظرتون باید زنگ بزنم برای تبریک بهش یا پیام بدم؟ [FACE_WITH_TEARS_OF_JOY]	1	1	0	0	3	irrelevant
هر وقت این ترانه فتانه که کوییک استایل باهاش رقصید رو می شنوم یاد اون همسر سابق ممد خردادیان می افتم که تو اون ویدیو کلاس رقص قدیمی باهاش می رقصید و بعدن بیمار شد و فوت کرد ممدم که دیگه بعدش گی شد	0	1	2	0	3	relevant
نه اقا :)) ولی الان مثال بزنم هواییم زمینی میشه میره تو چشمم :))) منظورم تند حرف زدن بود	0	0	3	0	3	irrelevant
این دیگه از پارتنرم بالاتره [NEUTRAL_FACE] نگین رفیق بش	2	1	2	1	2	relevant
: واکنش شازده پهلوی به گوهرپراکنی های شوهرِ مهشید: خلیج فارس	0	0	3	0	3	irrelevant
مبحث امروز جمع خانوادگی شوهر : لیبرالیسم و نیو لیبرال مبحث امشب جمع خانوادگی ما : فواید عنبر نسا و نحوه تهیه عنبر نسا تفاهم بیداد می کنه بین خانواده ها [FACE_WITH_TEARS_OF_JOY][FACE_WITH_TEARS_OF_JOY]	2	1	1	1	1	relevant
خالم و شوهر خالم نشستن دارن به جدیت بهم میگن این پسره خیلی مناسبه،جالب میشه اگر باهاش دوست بشی =)))))	1	0	3	0	3	irrelevant
ای شوهر برام نیومد .تمام عکسایی که خواب بودی بیسکوییت گزاشتم تو دهنت پخش میکنم	1	0	3	0	3	irrelevant
: خیلی وقت بود از شوهرم عکس نذاشته بودم، بهرحال فردا خودش میاد [RELIEVED_FACE]	2	1	2	1	2	relevant
توام چند همسری رو اختیار کردی چاگیا؟؟ exo -	0	1	0	0	3	relevant
امشب با am i the one همسرم بث هارت عرش رو دریدم. مرحبا به این زن، مرحبا واقعا.	2	1	0	1	0	relevant
اقا من هی ذوق میکنم 600 گرمی میشم هی انفالو میکنید [SMILING_FACE_WITH_TEAR][SMILING_FACE_WITH_TEAR]نکنید توروخدا[SMILING_FACE_WITH_TEAR][BROKEN_HEART] فالو کنید به همه بک میدم [CROSS_MARK]فالو=فالو دوس داشتید اینم ریت بزنید توییت بذارید منم ریت میزنم[SMILING_FACE_WITH_SUNGLASSES][FIRE]	0	0	3	0	3	irrelevant
اقا من سوال رو نفهمیدم اشتباهی زدم رو اولی ببخشید من اخری رو میزنم [NEUTRAL_FACE][FACE_WITH_TEARS_OF_JOY]	0	0	3	0	3	irrelevant
جوری نباشه به همسرت بگی فقط مال من باش؟ نه، مثل زن مهدی در اختیار بردران حشد و حوثی و حماس هم باشید.	0	1	1	0	3	irrelevant
یکی از تصمیماتم برای سال جدید اینه که اگه رفتم تو رابطه ،دیگه هیچوقت راجب اکس دوست پسرم هیییییییییچ سوالی نکنم و هیچی ندونم ، نمیدونم رفتارت نرماله یا نه ولی منم بودم همین حسو داشتم	1	1	1	1	1	relevant
ینی اینجا طوری شده که من دیگه میترسم به کسی بیب و عزیزم و زن و مردتیکه و .. اخر جملهام اضافه کنم	0	0	3	0	3	irrelevant
نمی دونم چرا انقد تو اینستاگرام خودمو سانسور می کنم.مثلا اینجا میگم چقد حالم بده و اونجا از ترس واکنش ها لبخند می زنم.	0	0	3	0	3	irrelevant
امان از بی همسری، [BEAMING_FACE_WITH_SMILING_EYES]	1	1	1	0	3	irrelevant
اولین کس نمکی با ساعتو شوهر خالم کرد، از دستشویی اومدم بیرون گفت یه ساعت اون تو چی میکردی؟ خخخخخخ	0	0	3	0	3	irrelevant
مبینا جون الان که یک ساعت از 1/1/1 گذشته فرصت رو غنیمت بشمار زنم شو	1	1	0	0	3	irrelevant
اقا منظور توییت برای تو بود؟ :))) فکر کردم واسه خودم باید رقم بزنم :)))	0	0	3	0	3	irrelevant
من باید به چند همسری رو بیارم پس [PENSIVE_FACE]	2	1	0	1	0	relevant
هم شوهرت حق داره هم بچن حق داره هم تو حق داری…	0	1	2	0	3	relevant
خانوماا چرا باید عکس شوهرتون و بزارید پروفایل واتس اپ !؟؟؟؟ هی میگم این کیه به من پیام داده [GRINNING_FACE_WITH_SWEAT][WOMAN_FACEPALMING_LIGHT_SKIN_TONE]	0	1	2	0	3	relevant
شوربختانه شماری از هممیهنان که از قضا در رسته میهن پرستان هم هستندچنان برای هفت سین انداختن بایدن غش و ضعف میروند ودست به تفاسیر گونه گون هم پیرامون ان میزنندگویی بانوی نخست یانکی ها کلید براندازی و رهایی ایرانزمین را بر خوانچه هفت سین2581 در کاخ سفید نهاده ، تا همسر جان [BACKHAND_INDEX_POINTING_DOWN]	0	0	3	0	3	irrelevant
: هر کی تو عید ازم بپرسه چرا زن نمیگیری؟ میگم چون جق میزنم	1	0	3	0	3	irrelevant
از سال 55 به بعد مشکل تورم خیلی جدی شده بود. تو برنامه تلویزیونی کاف شو هم اون زن و شوهر که مشکل مستاجری دارند هم بود دیگه	0	1	1	0	3	relevant
: +اینجا کنار امضای همسرتون رو امضا کنید لطفا تا ازدواجتون رسمی بشه-	0	1	0	0	3	relevant
اخه حاج اقا فقط چادر چاقچولی همسر میگیره. عکس شما که اینو نمیگه	0	1	2	0	3	relevant
زیدم ازم پرسید چند سانته؟ گفتم جدید یا قدیم؟	2	1	2	1	2	relevant
بله خیلی زیاده این ماجرا.مردا تو ایران اعتماد ندارن به زنا که نصف خونه رو بزنن به نامش.جدیدا میگن یه چیزی هست به اسم صلح عمری.که اختیار اموال میرسه به زن بعد از فوت شوهر.حالا بازم دوستان وکیل بهتر میدونن	0	1	1	0	3	relevant
پسرها واقعا گاهی نفهمیدنی اند. به زیدم می گم دلم تنگ شده بیا حرف بزنیم می گه نود من چی شد.	2	1	1	1	1	relevant
ساعت 23:50 بود، گفتم میرم مسواک می زنم و برمی گردم پای ادامه سریالم. بعد ده دقیقه برگشتم، دیدم شده ساعه 1 بامداد.	0	0	3	0	3	irrelevant
محمد علی ابطحی ( فعال سیاسی اصلاح طلب ) : این حرف را از سر اعتقاد می زنم ؛ اقای موسوی از سر نادانی ، اقای خاتمی از سر خیانت و اقای هاشمی رفسنجانی از سر انتقام گیری وارد این ماجرا ( فتنه 88 ) شدند !!	0	0	3	0	3	irrelevant
پارسال این موقع ها بود که داشتیم با هم حرف می زدیم، امسال این موقعست که دیگه حرف نمی زنیم. خب فقط بگم، بیشتر شما نمی دونید من درباره ی کی حرف می زنم، ترجیح می دم همتون ندونید اما اگه بعضیاتون می دونید و می شناسیدش اینو باید بگم، اون ادم هیچ بدی ای در حق من نکرد، اگه من حرفی زدم	1	1	1	1	1	relevant
دیگه بیا زنم شو [LOUDLY_CRYING_FACE]	1	1	0	0	3	irrelevant
ی چنتا کتاب باحال دیدم ولی خب ی پارتنر ندارم ک براش عیدی کتا بخرم اون موضوع کنسله [FROWNING_FACE]	1	1	1	0	3	irrelevant
راست میگی خیلی منطقی و رادیکالی بود نگاهم [FACE_WITH_TEARS_OF_JOY][RELIEVED_FACE] ایشالا یه همسر خوب بیاد توی زندگیش ولی بازم ایشالا که فکراشو بکنه [SMILING_FACE_WITH_SUNGLASSES]	0	1	0	0	3	irrelevant
اره ولی خب کی گفته ادم نمی تونه بچه رو به همسری بگیره ؟ [PERSON_SHRUGGING]	0	1	2	0	3	relevant
انیمیشن قشنگارو تو سیو مسیج تلگرامم نگه داشتم تا بعدا برا زیدم بفرستم.	2	1	0	1	0	relevant
مادر شوهر مثل من 1/1دنیا اومده مبارک باشه [COWBOY_HAT_FACE][SMILING_FACE_WITH_OPEN_HANDS]	2	1	2	1	2	relevant
والا من ک دعوام شد الان بایکیشون. گفتم من میخواستم مثل تو شوهر کنم الان دوتا بچه داشتم [FACE_WITH_TEARS_OF_JOY][FACE_WITH_TEARS_OF_JOY]	1	1	2	0	3	irrelevant
بلاخره یه روز شوهر میکنم و براش ته چین میپزم اونم میگه خانوم ته چینی که تو میپزی از سکس هم بهتره	1	1	0	0	3	irrelevant
تحقیقات در امریکا ثابت کرده سکس قبل از ازدواج در زندگی اینده و ازدواج دختر تاثیر داره و درصد موفقیتش رو کم می کنه هر چقدر پارتنر بیشتری برای سکس وجود داشته، اما برای مردان همچین چیزی وجود نداره! این روزا میگن قبل ازدواج سکس رو تجربه کن حتی شده با ده نفر تا ادم درست رو پیدا کنی!!	0	1	2	0	3	relevant
واقعا اگه همسر ایندم گیمر نباشه چی؟؟ [FACE_WITH_TEARS_OF_JOY][SMILING_FACE_WITH_TEAR][PENSIVE_FACE]	1	1	1	0	3	irrelevant
میگن از خودبیخود شده . منم تجربه دارم . تازه خواستگار اومده بود براش جواب تلفنمو نمیداد میگفت پشت خطی شوهرم بودی [FACE_WITH_OPEN_MOUTH][FACE_WITH_OPEN_MOUTH][VICTORY_HAND]	0	1	1	0	3	relevant
جدی از من ارزوی سال جدید میخواین؟ بلند بگم؟ شوهررر! [FACE_WITH_TEARS_OF_JOY] خسته شدم از عن بازی و دیت کوفتی ، دیگه حوصله مراحل مقدماتی رو ندارم	1	1	1	1	1	relevant
شوهری که از این طریق میبره خونه حلال حلاله	2	1	0	1	0	relevant
چطوری سر سال نویی شوهر میکنن؟! من خیلی هنر کنم برم حموم.	1	1	2	0	3	irrelevant
ممکنه یکی جیگر باشه ولی برای شوهر من شدن کافی نباشه	1	1	2	0	3	irrelevant
به علم پزشکی شک میکنم، چون خودم که رحم ندارم و پارتنرم هم اسپرم نداره، پس از لحاظ علمی احتمالش کمه که حامله شم ازش	2	1	2	1	2	relevant
با من هستید؟ من معتقد به ساختن در کنار هم هستم . هیچ چشم داشتی هم به اموال همسرم قبل از حضور من در زندگیش ندارم. حتی اگر ارث هم بهش تعلق بگیره برای خودشه! اگر با هم تلاش کردیم و ساختیم و خریدیم پس نصف نصف.	2	1	2	1	2	relevant
به نظر من ابی فقط شوهر مهشیده ،هنرمندان خیلی بهتر از این ادم وجود داره که میشه از هنرشون لذت برد.	0	1	2	0	3	irrelevant
دختر عمم رو من بزرگ کردم ، الان اومدم دیدم شوهر کرده [NEUTRAL_FACE]	0	1	2	0	3	relevant
حاجی اتفاقاً میخواستم راجع به این زنان علیه زنانم یه توییت بزنم بعد خوندن بقیه ی منشنا و اومدم دیدم تو گفتی :))) یعنی قشنگ فشاری شدند یه عده از حسادت [SLIGHTLY_SMILING_FACE][SLIGHTLY_SMILING_FACE][SLIGHTLY_SMILING_FACE]	0	0	3	0	3	irrelevant
در سابقه حمایت شراگیم زند از حقوق زن همین بس که او مبلغ رای به مردیست که تجاوز به دختر زیر سن (کودک همسر) در کارنامه اش دارد. پناهنده قلابی که هنرش تخریب فعالین واقعیست. بیشرمانه به خانم مرادیان نژاد حمله میکند، فردی که سالیان زیادی را وقف به تصویر کشیدن رنج زنان منطقه کرده است.	0	0	3	0	3	irrelevant
هی میگه ویژگی همسر خوب بگید 8 صبح به تنها چیزی ک فکر نمی کنم شوهر [WOMAN_WALKING_LIGHT_SKIN_TONE]	1	1	2	0	3	irrelevant
در ازادی زنم دست راستم بود و در زندان دست راستم زنم مهاتماگاندی	2	1	0	1	0	relevant
رزاع که زنمه شوهرم یکی دیگه اس	2	1	2	1	2	relevant
[PAINTBRUSH]حادثه هولناک؛ اتش سوزی عمدی توسط شوهر، جان زن ملایری را گرفت! [NO_ENTRY] یک مرد عمدا همسرش را به اتش کشید وهمسر به دلیل شدت جراحات در بیمارستان جان خود را از دست داد.	0	1	1	0	3	relevant
ولی تو شرایط فعلی، صرفه در شوهر کردنه، نه زن گرفتن! من شوهر میخام:) [CRYING_FACE][CRYING_FACE]	1	1	0	0	3	irrelevant
خب الان زنت این وسط چه مشکلی ایجاد می کنه؟	0	1	2	1	2	relevant
سربازی برای همه مردم لازمه ولی باید شیوه فرق کنه و فقط دوره کوتاه اموزشی باشه مرد و زنم نداره	0	0	3	0	3	irrelevant
دوست پسر من میگه اماده باش یه کوچولو دیگه میام دنبالت حالا یه کوچولو دیگه منظورش دقیقا کِیه ؟ دو سه ساعت بعد :)))	2	1	1	1	1	relevant
مادر شوهر من بعد زایمانم گفت تو که طبیعی نزاییدی نمیدونی رنج مادر شدن یعنی چی، ایشالله بعدی رو طبیعی بزایی میفهمی بچه ها چرا باید احترام مادرشون رو حفظ کنند [FACE_WITH_TEARS_OF_JOY][FACE_WITH_TEARS_OF_JOY][FACE_WITH_TEARS_OF_JOY]	2	1	2	1	2	relevant
زن من میشی حاج خانوم	1	1	0	0	3	irrelevant
تو اینستا خانمم نشون داد که یه چالش گذاشتن با اون اهنگ همه دارن میرقصن، خیلی باحال بود، کلی کیف کردیم!!	2	1	2	1	2	relevant
برای شوهر داشتن یکم بَچم [FACE_WITH_TEARS_OF_JOY]	1	1	1	0	3	irrelevant
من برای دوست دخترم هر روز: بیبی کام تو دوبای [NEW_MOON_FACE]	2	1	2	1	2	relevant
نشستم از صبح حساب کتاب و برنامه ریزی میکنم ببینم چه گهی باید بخورم بعد از تعطیلات، سر بسته بخوام بگم زنم گاییده س.	1	0	3	0	3	irrelevant
خانم منو شما خیلی تفاهم داریم [SMILING_FACE_WITH_TEAR][HEART_SUIT]	1	1	0	1	0	relevant
ببین توییتمو که نوشته بودم اگه شوهر کنم برام نخوره چی تو پیج فارسی فکتس ام دیدم ینی حیثیت برام نموند =))))	1	0	3	0	3	irrelevant
به همون دلیل که من بعضی وقت ها می زنم برم ببینم کی جز من نسبت به سمنان نفرت پراکنی کرده. :)))))	0	0	3	0	3	irrelevant
ابطحی حذف شده چون [BACKHAND_INDEX_POINTING_DOWN][BACKHAND_INDEX_POINTING_DOWN][BACKHAND_INDEX_POINTING_DOWN] محمد علی ابطحی ( فعال سیاسی اصلاح طلب ) : این حرف را از سر اعتقاد می زنم ؛ اقای موسوی از سر نادانی ، اقای خاتمی از سر خیانت و اقای هاشمی رفسنجانی از سر انتقام گیری وارد این ماجرا ( فتنه 88 ) شدند !! [WINKING_FACE] [SMILING_FACE_WITH_SMILING_EYES]	0	0	3	0	3	irrelevant
ولی پارتنر من نزاره چی؟	2	1	2	1	2	relevant
اکثرا دلبستگی هاشون میشه بچه هاشون چون نه از پدر و مادر نه از شوهر هیچ محبتی نمیبینن	0	1	1	0	3	relevant
دور از جونت عزیزم ولی فقط مرگه که راه حل نداره اینجوری که نمیشه فرزند هم نداری باید حتما صحبت کنی با همسرت جلوی همه باایست نترس از ابرو و حرف مردم این مردم مگه زیر سقف شما هستتد مگه جای شما هستند؟واسه راضی نگه داشتن دیگران خودت رو زجر چرا میدی؟از تراپیست کمک بگیر حتما مگه [BACKHAND_INDEX_POINTING_DOWN]	0	1	1	0	3	relevant
با اینکه در تاریخ 01/01/01 بزرگترین و کوچکترین فرد فامیل رو خونم به صرف شام دعوت کردم و فردا هم یه مهمونی 25 نفره رو قراره تو خونم بگردونم و بساط پذیرایی و شام و.. رو فراهم کنم؛ اما همچنان امادگی یک رویارویی کوتاه با پدر دوست پسرم رو ندارم و مدام ازش می خوام بپیچونه قضیه رو!	2	1	2	1	2	relevant
هر جوانی در اغاز جوانی زن بگیرد، شیطان بر وی بانگ براورد، وای بر او، دین خود را از دستبرد من محفوظ داشت. (به شرط رعایت اداب همسرداری [UPSIDE_DOWN_FACE] ) (نهج الفصاحه ، ح 1034)	0	1	2	0	3	relevant
نودو فقط به زنم میدم [WEARY_FACE]	2	1	2	1	2	relevant
: اگه زنم بگه لباس ست بپوشیم و با سفره هفت سین عکس بگیریم استوری کنیم چی؟!	2	1	2	1	2	relevant
ما از تنیس که میایم همسر جان جریت نمیکنه با شلوارکش تا سوپری بره از تو ماشین. دیگه خودتون میدونید :)))	2	1	2	1	2	relevant
اگه مرد بود بگو هنوز زنت طلاق ندادی اگه زن بود بگو هر وقت تو طلاق گرفتی [FACE_WITH_TEARS_OF_JOY]	0	0	3	0	3	irrelevant
خانم دُکی شوهر خلبان علاقه نشون میده و تحریکش می کنه خلبان حقوقش ماهی دو میلیون تومان هستش تازه هواپیما هم مستهلک شده، و اعتبار و دعای میکانیک نگهش داشته، تا در میانه خواسته کردگار چیست٫ عدالت عدالت کاری مغزخر	0	1	2	0	3	relevant
+ببخشید شما رو برای چی اوردن اینجا؟ -شوهر نکردم اوردنم اینجا + [NEUTRAL_FACE] _[BROKEN_HEART] ایا دلیلی منطقی میباشد؟	1	0	3	0	3	irrelevant
دروغ میگی چند سال پیش دنبال خونه اجاره ایی بودم شاگرد املاکی ناوارد موردی باب من پیشنهاد کرد و گفتم ببینم رو مشاور کرد و دو سه بار گفت فلان مورد رو نشون این اقا بدیم مشاور با تحکم گفت اون جای مناسب قیمت رو ب زن و شوهر…(اشاره جنسی و شهر)ن ب هر کسی	0	1	2	0	3	relevant
افسانه یا واقعیت؟ ایا شما نمونه سالم و موفقی دیدین از اینکه دوتا پارتنر رابطه شونو تموم کنن و بعدش بتونن دوستای نزدیک هم باشن؟	0	1	2	0	3	relevant
دوباره نشستم یه قسمتایی از better call saul رو نگاه کردم و دوباره به این نتیجه رسیدم که کیم وکسلر واقعاً ایده ال ترین دوست دختر/پارتنر دنیاست.	0	1	0	0	3	relevant
همسر و مادر بودن شغل محسوب میشه؟	2	1	2	1	2	relevant
مامانم چرا انقدر دخترش رو شوهری بزرگ کرده؟ بابا من می خوام ازدواج سفید بکنم. :))))))))	1	1	0	0	3	irrelevant
به شوهرت بگو البومشو زودتر بده [SMILING_FACE_WITH_TEAR][MOAI]	0	1	2	0	3	relevant
اونقد خستم که میخوام شوهر کنم اصن	1	1	2	0	3	irrelevant
دیشب اونکه مرد تو خبرگزاری نوشته بود از عوامل از دنیا بردنِ همون کسی بود که تو اعتراف اجباریش از خودمحوری نوشته بود! همون بچه تنهاعه بود که به خاطرش به یکی دیگه گفتن ساده لوح! همون.	0	0	3	0	3	irrelevant
وقتی با دوست پسر یا همسرتون عکس میگیرید اون فیلتر لعنتی رو خاموش کنید بچه مردم با ریش و سیبیل سفید مفید و لپ گلی نشه	0	1	2	0	3	relevant
شوهر خالم بهم گفت یک ساعت تو دستشویی چیکار میکردی 11 رفتی 1 در اومدی	0	0	3	0	3	irrelevant
وسط مهمونی اینا یادم افتاده که بهم گفته عزیزم من این توییت فوتبالیارو می زنم تو educate شی، بعد دقیقا همون توییتا رو اسکیپ می کنی؟ =)))))))))	2	1	1	1	1	relevant
همه شوهر کردن من موندم فقط به قران [UNAMUSED_FACE]	1	1	1	0	3	irrelevant
پس برسان به پنگوین سلام ما را شوهر عمه	0	0	3	0	3	irrelevant
: یبارم دوست دخترم لوونرژسترل خورده بود دلش درد می کرد برای اینکه حواسش پرت شه گرفتم کردمش	2	1	2	1	2	relevant
:///شما خودت از تناقض دوتا کلمه ی بچه و همسر کنار هم رنج نمی بری؟	0	1	1	0	3	relevant
باورم نمیشه هنوز یه سری بلاگرا استوری میذارن از «فلان شوهر پز» یا «فلان چی پدر شوهر پز»!	0	1	2	0	3	relevant
نمی دونم چرا وقتی به یکی زنگ می زنم و جواب می ده انقدر ناراحت می شم	0	0	3	0	3	irrelevant
دیدن مردم فقط با پارتنر راضی میشن تارا و شاهین هدیه میدن دیگه چی میخواین؟	0	1	0	0	3	relevant
بی شوهری هم موفقیت نیست. ولی کسی که اراده تشکیل زندگی مشترک رو نداره یک بازنده است.	0	1	1	0	3	relevant
متاسفانه بنده به تبدیل پسر مردم به شوهر نیاز دارم:((( این اموزشا به دردم نمیخوره	1	1	0	0	3	irrelevant
گر نیمه شبی مست در اغوش من افتد… چندان به لبش بوسه زنم کز سخن افتد .. [ROSE][ROSE][RED_HEART][RED_HEART] [WINE_GLASS][WINE_GLASS] شبتون بخیر دوستان عزیزم	0	0	3	0	3	irrelevant
هوای شمال وااااقعا ازدواجیه. ازونا که باید عکس با شوهرم می ذاشتم می نوشتم ماشاالله لا حول و لا قوه الا باالله العلی العظیم یا مثلا ما یک باره به تو مقید شدیم یا بلد نیستم برم یکم استوری نگاه کنم یاد بگیرم.	1	1	0	0	3	irrelevant
مشکل اینه که ادمای سنتی به دوسپسر به چشمِ شوهر to be نگاه میکنن. کانسپت دوسپسر خالی خالی اصن براشون قابل درک نیست.	0	1	1	0	3	relevant
ای ارباب، سال نو مبارکتان باشد. ای ارباب، خانه ات پر از ذرت، زیتون و شراب بشود. همسر تو ستونی باشد از مرمر که به سقف می رسد. دخترت شوهر کند و نه پسر و یک دختر بزاید. و باشد که پسرانت قسطنطنیه شهر سلاطین ما را ازاد کنند… (از کتاب زوربای یونانی-نیکوس کازانتزاکیس)	0	1	2	0	3	relevant
چند سال پیش دوستم وقتی ازدواج کرد، دوست پسر سابقش زنگ زده بود به شوهرش گفته بود؛ زنت با من دوست بوده…! شوهرش گفته بود من عرضه داشتم باهاش ازدواج کردم تو نداشتی… از این مَردا باشین…	0	1	0	0	3	relevant
در حال خلق دو تا زن و شوهر فانتزی [WINKING_FACE]	0	0	3	0	3	irrelevant
مشاور من به خانمم گفت هر وقت از کلمه باید و نباید استفاده کنی جمال مضطرب میشه	2	1	1	1	1	relevant
[STAR_STRUCK]من و همسرم اغاز چهل و چهارمین سال چپاول ملت ایران را به همه ملت غیور و صبور تبریک می گوییم و امیدواریم کنار اخوندهای دست نشونده هامون در تهران ایام به کام و به کون تان باشد. با تقدیم احترام فایقه جو (و گندم) بایدن[STAR_STRUCK][WRITING_HAND]	2	1	2	1	2	irrelevant
اما راستشو نمیگن، اقای من خانم من راستش اینه : یه غمی تو این هوا هست, که ادم دلش میخواد بمیره	0	0	3	0	3	irrelevant
من تنبل درختی ام! شما از منم تنبل تری [ROLLING_ON_THE_FLOOR_LAUGHING] اینا صفحه اول گوگل که حالشو نداشتی بگردی؛ هم لینک خبرگزاری داخلی هست، هم خارجی خرده جنایت های زن و شوهری . . .	0	1	1	0	3	relevant
ی افسانه یونانی هست ک میگه جونگین شوهر منه	0	1	2	1	2	relevant
امیدوارم اون یکی رو وقتی ک با شوهرت رابطه داشتی بازش کردی	0	1	2	0	2	relevant
یادته توییت کرده بودی چرا مردا بعد از ازدواج کیفیت و کمیتشون میاد پایین؟ این جواب شوهرا به همسران زیاده خواهه [FACE_WITH_TEARS_OF_JOY][FACE_WITH_TEARS_OF_JOY]	0	1	1	0	3	relevant
من خودم در به در دنبال شوهرم	1	1	2	0	3	irrelevant
اصلا خود مهشید هم انتخاب ایشونه. ادم ها روی هم تاثیر می گذارند و قطعا اگر همسر فهمیده ای داشت اوضاع فرق می کرد.	0	1	1	0	3	relevant
اعدام زن باردار و شوهرش اون دیگه جنایت بود [SAD_BUT_RELIEVED_FACE]	0	1	1	0	3	relevant
نه، خدا رو شکر امروز رفتیم خونه پدر و مادرم و خواهرم و مادر خانمم. تموم شد دیگه از عید دیدنی خبری نیست	2	1	2	1	2	relevant
داشتم فک میکردم شوهر مورد علاقه ام فکر و کلام مجتبی شکوری در جسم کپتن امریکاس [FACE_WITH_TEARS_OF_JOY]	1	1	0	0	3	irrelevant
اقااااا چرا دارید رفاقتارو میریزید تو زن و شوهریااااا [PENSIVE_FACE][FACE_WITH_TEARS_OF_JOY]	0	1	2	0	3	relevant
نه دوست دخترم هدیه داد ،نه بابام گرفته نه بهم کادو دادن نه مامانم گرفته خودم کار کردم و خریدمش [SMILING_FACE_WITH_HEART_EYES][SMILING_FACE_WITH_HEART_EYES]	2	1	1	1	1	relevant
احیانا به امیر گفته دیگه، اون طفلک حتی یه دوست پسرم نداره که [FACE_WITH_TEARS_OF_JOY][FACE_WITH_TEARS_OF_JOY][FACE_WITH_TEARS_OF_JOY]	0	0	3	0	3	irrelevant
همیشه برام سوال بود حتی اون پدر مادرهایی ک بچشونو میزنن محدودش میکنن تحقیر میکنن و بدون توجه به علایق بچش تو سن کم شوهر/زن میدن و و و حتی اینا هم جاشون بهشته؟؟؟ حتی اونایی ک پدر شدن ولی بچشون نمیدونه باباش کیه چی؟ اونم جاش بهشته؟	0	1	1	0	3	relevant
من اصن غلط کنم بچه دار بشم خوبه؟؟؟؟ شوهرم نمیخوام	1	1	1	0	3	irrelevant
برات دست بزنم یا زوده جناب سعدی؟! اخ اخ من خیت شدم خیلی ناراحت شدم [PLEADING_FACE][SMILING_FACE_WITH_TEAR] منو ناراحت نکن [FACE_WITH_TEARS_OF_JOY][FACE_WITH_TEARS_OF_JOY][FACE_WITH_TEARS_OF_JOY][FACE_WITH_TEARS_OF_JOY]	0	0	3	0	3	irrelevant
این روزا با هر کی حرف می زنم، از پزشک تا نظامی، به این نتیجه می رسم که وضع این مملکت خیلی خرابه. اموزش غلط دیده ایم. خراب به بار اومده ایم. اخلاق، ارمان، امید، شرف و منطق نداریم. نتیجه سیاست رذل این نظام توی هر ثانیه از زندگی مون عیانه. چطور اینقدر بی تفاوتید؟	0	0	3	0	3	irrelevant
مگه الهه حصاری شوهر دارههه	0	1	2	0	3	irrelevant
اهنگی متفاوت از مرتضی پاشایی با هنرنمایی هنرمند محبوب و توانا،شیپور زن توانای اخروی جناب اسرافیل	0	0	3	0	3	irrelevant
و اینک پایان این روز رو که نقش یک زن تنهای خانه دار رو بازی کردم و برای شوهرم غذا پختم و اون منو ول کرد و رفت که با رفقاش سیگار بکشه و غذا بخوره اعلام میکنم. موندم که فردا نقش دانشجوی فلک زده ای که توی عیدم باید بشینه تند تند کار کنه رو بازی کنم یا زن جوان بیخیال و خوش گذرون رو؟	2	1	1	1	1	relevant
: چرا ترودو میگه نوروزتان پیروز من انگار یخ می زنم؟!	0	0	3	0	3	irrelevant
اره عقد اینش یده که بعد از شیش ماه بفهمی ای داد بیداد این ادم اصلا اون چیزی که تو فکر میکردی نیست اون وقت یا باید بسازی یا مهر طلاق میخوره رو پیشونیت اون وقت دیگه نمیگن فلانی صیغه بوده میگن فلانی شوهر کرد و طلاق گرفت [NEUTRAL_FACE]	0	1	1	1	1	relevant
مبارکه ولی به ویلایی که شوهر خالم برام خریده نمیرسه [SMILING_FACE_WITH_SUNGLASSES][SMILING_FACE_WITH_SUNGLASSES]	0	0	3	0	3	irrelevant
پسرم نمیخوابه مجبورم گهواره اش تکان بدم تا بخوابه چون ختنه اش کردیم [GRIMACING_FACE] میخواهم خودم بیدار باشم تا خانمم بخوابه[FACE_WITH_HEAD_BANDAGE][NEUTRAL_FACE]	2	1	2	1	2	relevant
ولی اگه دوست دخترم بدون اینکه به من بگه قزصشو قطع کنه همونو سینگل میشه!	2	1	2	1	2	relevant
اهل ادب باشخصیت خانم اهل تمکین و شوهردار رو شوهر دوست اهل مطالعه و یاد گیری متین بساز با حوصله مومن	0	1	0	0	3	relevant
جا خنده بشین دعا کن یه دوست پسری یه شوهری چیزی برا من پیدا بشه	1	1	2	0	3	irrelevant
: اما راستشو نمیگن، اقای من خانم من راستش اینه : یه غمی تو این هوا هست, که ادم دلش میخواد بمیره	0	0	3	0	3	irrelevant
خدایا چه عجوزه ای هستی تو [FLUSHED_FACE] خدا به شوهرت صبر بده	0	1	1	0	3	relevant
همسر قشنگم تو چطوری؟	2	1	0	1	0	relevant
زن من میشی؟	1	1	2	0	3	irrelevant
درخواست شوهر اورژانسی متقاضیان نام محل زندگی عکس کارت ملی دو قطعه عکس سه در چهار یک تمبر یا 10هزار تومن هزینه تمبر زیر منشن کنن	1	1	2	0	3	irrelevant
جلوی شاگردام گفتم ایشون(یعنی همسرم)شوهرم هستند [FACE_WITHOUT_MOUTH][NEUTRAL_FACE]	2	1	2	1	2	relevant
خسته شدم 4 ساعته بیمارستانم [FACE_WITH_HEAD_BANDAGE] مادرشوهرم عزیزم زحمت نکشید بیاد	2	1	1	1	1	relevant
هممون داریم همینو زندگی می کنیم. :))) بخشی از کتاب از دو که حرف می زنم از چه حرف می زنم-هاروکی موراکامی هست.	0	0	3	0	3	irrelevant
من تو این مملکت تصمیم دارم هیچ وقت ازدواج نکنم ولی چندین بار همین قضیه تو خود توییتر وایرال شده که طرف و سر پیری اواره کردن موقع طلاق و همه جا قانونه که حرف اول و میزنه و پارتنر و هرکسی ام ک روبروت باشه ب همین قانون متوصل میشه حالا هرجور خودتون صلاح میدونید !	1	1	1	0	3	relevant
اختلاف فرهنگی فقط اونجایی که همسرم برنامه دور همی و خوشگذرونی با رفقاش میچینه و من در فکر افطاری دادن به دوستانم در هفته ی سوم فروردینم اصلا تفاهم موج میزنه [WOMAN_FACEPALMING][WINKING_FACE]	2	1	1	1	1	relevant
: گر نیمه شبی مست در اغوش من افتد… چندان به لبش بوسه زنم کز سخن افتد .. [ROSE][ROSE][RED_HEART][RED_HEART] [WINE_GLASS][WINE_GLASS] شبتون بخیر دوستان عزیزم	0	0	3	0	3	irrelevant
دخترای سرزمینم اگر پارتنر دارید سریع پاشید مثل دختره برقصید و برای پارتنرتون بفرستید [PENSIVE_FACE] ما که نداریم باید رقص ایشون رو ببینیم…	1	1	1	0	3	irrelevant
: ی افسانه یونانی هست ک میگه جونگین شوهر منه	0	1	2	0	3	irrelevant
کلا به سیستم ها اعتمادی ندارم! هر ماه که حقوق حساب می کنم استرس دارم کمتر از حقشون بشه! چند ساعت اضافه کار می زنم که حق نا حق نشه [GRINNING_FACE_WITH_SWEAT] البته کاملا این که از کدومون بیشتر خوشم بیاد هم بی تاثیر نیست	0	0	3	0	3	irrelevant
[FACE_WITH_TEARS_OF_JOY] اینجوری هفته ای دوبار شوهر طلاق میدی که	0	1	1	0	3	relevant
درصدشو نمیدونم.. ولی فکر میکنم تعداد اون 10% کم نباشه [GRINNING_FACE_WITH_SMILING_EYES] واقعا سکس مساله مهمیه. حتی واسه ازدواج هم ترجیه میدیم پارتنرمون سکسی باشه	0	1	2	0	3	relevant
من پارتنرم و بابام یچیز میگن میزنم زیر گریه	2	1	1	1	1	relevant
: [CANDLE][CANDLE]پارتنر بسکتبالیست تو 1401[FACE_WITH_TEARS_OF_JOY][CANDLE][CANDLE]	0	1	2	0	3	relevant
خدایی اشکم درومده از صب دارم توییتای سربازی رو میخونم یکی نوشته بود یکی متاهل بود مرخصی میخواسته بهش میگن 24 ساعت یه بند شیفت بده بعد میگن توالتارو تمیز کن بعدم میگن کچل کن طرف میگه دارم میرم پیش نامزدم بذارید برگشتم کچل کنم مافوقش لج میکنه که نه همین الان واقعا تف تف تف	0	1	1	0	3	relevant
: من رو هرکی کراش زدم [NEUTRAL_FACE] یا دوست دختر داشته، یا شوهر داشته تازه قبلا یه جوری کراش میزدم که بچه داشتن[FACE_WITH_TEARS_OF_JOY][FACE_WITH_TEARS_OF_JOY]	1	1	1	0	3	irrelevant
من زنم الان باید بغلم باشه من خودم پانشم غذد درست کنم یه ساعت	2	1	2	0	3	relevant
این استرس عید دیدنی خانواده دوست پسر منو کشت، از اینجا به بعد حس میکنم دیگه عید تمومه و رسالتم به اتمام رسید :))	2	1	1	1	1	relevant
توکه زود کراش میزنی زنم پیدا کن دیگه don't fight the feeling dont fight the feeling exo	0	1	2	0	3	irrelevant
ولی فعلاً از تیررس شوهرت تا یه مدت خارج شو [FACE_WITH_TEARS_OF_JOY]	0	1	1	0	3	relevant
رفتم خونهشون،خداروشکر مغازه نانوایی محلی روبه راه بود،بسته موادغذایی ولباس برای بچه بردیم،دیدم جای 3تا شدن 4 بچه، دختر نوجوانشونو ک برای رهایی از فقر مثلا،زود شوهر دادن،طلاق گرفته [SAD_BUT_RELIEVED_FACE] الان یک نوجوان نیست،یک انسان بحران زده س،از بحران ب بحران	0	1	1	0	3	relevant
: اهنگی متفاوت از مرتضی پاشایی با هنرنمایی هنرمند محبوب و توانا،شیپور زن توانای اخروی جناب اسرافیل	0	0	3	0	3	irrelevant
خیلی خوبه منم 7سال پیش که ازدواج کردم خانمم 17ساله بود	2	1	0	1	0	relevant
اینکه اقا بجایه خانم منشن بده یا برعکس چندان زشت نیس امروزه همسران با هم کارهایی ورفتارهایی عادی سازی میکنن که نمیشه گفت	0	1	1	0	3	relevant
تنها کسی که توی خونه اش بهم هیچ گونه دیسفوریایی دست نمی ده این زن و شوهرن. من از بچگی مورد علاقه شون بودم تا حالا. از روی شوخی چیزایی میگن که قلبم رو عمیقا شاد می کنه. استریو تایپ های جنسیت زده رو چنان تارومار میکنن که واقعا روحم ارامش میگیره.	0	1	0	0	3	relevant
من خودم دوست دختر نتونستم پیدا کنم ولی میتونم زنت بشم [WINKING_FACE]	1	1	1	0	3	irrelevant
دستشویی رفتن که اشکالی نداره عزیزم مهم اینه که به چه نیتی بری دستشویی برای رضای خدا و شوهرت یا برای ریدن؟وگرنه اگه زن مرض نداشته باشه کارشو توی بطریم می تونه بکنه…	0	0	3	0	3	irrelevant
احترام به مسلمان و اسلام: احترام به سنگسار احترام به کودک همسری احترام به اعدام احترام به شلاق احترام به ضرب و شتم زن احترام به توهین به کفار احترام به کنیز غنیمت جنگی احترام به برده داری احترام به دخالت در امور دیگران و… را به همراه دارد نوروز	0	1	1	0	3	relevant
اگ پارتنرم در اینده اینقد احمق باشه چی	1	1	1	0	3	irrelevant
اخه نیاندرتال! مردم جمهوری رو رها کنن برگردن به یک حکومت ساواکی دست نشانده قرون وسطایی که چی بشه؟ دوباره مثل بحرین دختر شوهر بدین یا مملکت رو دو دستی تقدیم کنین به متفقین؟	0	0	3	0	3	irrelevant
مگه ایالت یا یه حکومت خودمختار دارید؟ شوهرت خوابید همون کلیشه سابق که بنده هم با این سطح و اول در دامش افتادم	0	1	2	0	3	relevant
اگه زیدم بودی شبا میاوردمت تو پارکا قلیون بکشیم.	1	1	2	0	3	irrelevant
اخه چرا به شوهرم ندم :)))	2	1	2	1	2	relevant
موافقم باهات!! حکمت غربیاس که عروس رو پدرش راه می بره تا به داماد برسن و بعد میدتش دست داماد. خیلی ام همه میگن وای چه احساساتی و گوگولی. هم اون، هم این فرقی ندارن. دوتاش مردای این فامیل، «ضعیفه» رو میدن دست به شوهر. انگار زن از خودش هیچ انتخاب یا انسانیتی نداره. [UNAMUSED_FACE]	0	1	1	0	3	relevant
خیلی بی توجهی کردید امشب بهم. منم باهاتون قهر میکنم دیگه درباره ی کشتن زن و شوهرم براتون توییت نمیزنم [PENSIVE_FACE]	0	0	3	0	3	irrelevant
امسال دارم سعی میکنم تمام تبریکای نوروز رو وویس بدم. طول میکشه ولی حال میده؛ کلی فکر میکنم اسم زن یا شوهر یا بچه یا … طرف یادم بیاد و تو وویس نام ببرم. حافظه م داره فعال میشه [GRINNING_FACE_WITH_SWEAT]	0	0	3	0	3	irrelevant
ابی جان برای اماراتی ها و عرب ها تو و صدات اهمیت و ارزشی نداری البته حق هم دارن. کسان دیگه ای پول خرجت میکردن. اینبار رو فکرکنم محاسبات پولکیت اشتباه از کار دراومد البته از کسی که بخاطر پول بشین کنار قاتل کودکان مهناز افشار که کارش پول شویی برای شوهر دزدشه هیچی بعید نیست هیچی.	0	0	3	0	3	irrelevant
. هر دفعه بغلش می گیرم و ناشیانه قطعه ای می زنم. عشقی از دلم برای پیانوام می جوشد. که خدایا قَسَمت می دهم زودگذر نباشد. خدایا بگذار این پیانو مرا از این تنهایی نجات دهد. [RED_HEART][SPARKLES][MUSICAL_KEYBOARD]	0	0	3	0	3	irrelevant
توییت مرگ محمد محمدی ری شهری اولین وزیر اطلاعات ج.ا پس از پیروزی شورش منحوس 57 ، به درک واصل شد این شوررشی ملعون که ید طولایی در فساد اخلاقی و مالی داشت،بخاطر خواستگاری از طفلی 9 ساله و ازدواج با وی در 11 سالگی، جزوه بنیان گذاران کودک همسری در این رژیم کثیف بود خدایش نیامرزد	0	1	1	0	3	relevant
میخوای تو تخت خواب زن و شوهر مامور بزارن امنیت داشته باشی	0	1	2	0	3	relevant
از خوشبختی هام اینه شوهرم علاقه ای به گوجه نداره و گوجه کبابی های غذای اون به من میرسه [BEAMING_FACE_WITH_SMILING_EYES][GRINNING_FACE_WITH_SWEAT]	2	1	0	1	0	relevant
جزو اولین همسران حضرت بود قبل از ازدواج با خدیجه [GRINNING_FACE_WITH_SMILING_EYES]	0	1	2	0	3	relevant
همکار شما با همسر سابقم دست ب یکی کرد و سر منو کلاه گذاشت. چون ایران نبودم کلاهبرداری حساب نمیشه. اینم از قانون ایران. گندش بزنن.	0	1	1	1	1	relevant
من زنت نیستمممممم	1	1	1	0	3	irrelevant
فاکتورگیر در خارج نشستی کونتو گذاشتی جلوی اخوندا ها؟ بری زنتو بفروشی بهترازاین کاراست.مواظب باش زنتو دوقوز دفعه.. اوف ازطالبان.دارند زنان فارسو زنده زنده میکنند.بیا افغانستان در خدمتیم.زنتو هم بیار تا ازفرهنگ پارس دفاع کنید.زنت لازم میشه.	0	0	3	0	3	irrelevant
[UNAMUSED_FACE][UNAMUSED_FACE] تیکه میندازی ارشیا جون ولی من میخوام همونی باشم که همیشه پارتنر دوستاش به زیداشون میگن با این که مجرده نگرد خرابت میکنه [GRINNING_FACE_WITH_SMILING_EYES][UPSIDE_DOWN_FACE]	1	1	1	0	3	irrelevant
من به عنوان پسر اعتراف میکنم عکس این کارو واسه دوست دخترم انجام میدم نمیدونم چرا بازم بعضی دخترا انجام نمیدنن	2	1	2	1	2	relevant
خانم من شما رو فالو نکردم کسای دیگه هم که فالو کردم این توییت شما رو ریتوییت نکردن پس چرا این توییت تو تایملاین من میاد؟ میتونید راهنمایی کنید؟ چون به درک فیواستار شدید به درک که عکستون خوشکله یا نه چیکار باید کرد که با این مزخرفات توی توییتر مواجه نشد؟ مرسی	0	0	3	0	3	irrelevant
خانمم ساعت 23:35 بچه شیر داد خوابید. الان بیدارش کنم بگم ساعت 01:15 دقیقه شده میدونم میگه وای چقدر زود 1 شد [FACE_WITH_RAISED_EYEBROW]	2	1	2	1	2	relevant
رز این میخاد تو موهای همسر زیبای من دست کنه…تمه حسودی میکنهههههه [EXPRESSIONLESS_FACE][LOUDLY_CRYING_FACE]	2	1	0	1	0	relevant
: یکی از تفریحات ما اینه که همسرم ادای حرف زدن دخترم با دوستاشو دراره [FACE_WITH_TEARS_OF_JOY][FACE_WITH_TEARS_OF_JOY] با ما لوس حرف نمیزنه هاااا… ولی با دوستاش اوفففف[FACE_WITH_TEARS_OF_JOY] …	2	1	2	1	2	relevant
فیو میزنم اما با سابقه ده تا شوگر داشتن، قسم میخورم یه زن هیچوقت این جمله رو نخواهد نوشت [CALL_ME_HAND][HANDSHAKE]	0	0	3	0	3	irrelevant
تقریبا امروز همه ازدواج کردن؛ ایشالا منم 02/02/02 شوهر کنم دیگه. سگ خورد.	1	1	1	0	3	irrelevant
حیف که شوهر داری وگرنه بهت می گفتم [FACE_WITH_TEARS_OF_JOY][FACE_WITH_TEARS_OF_JOY][FACE_WITH_TEARS_OF_JOY][FACE_WITH_TEARS_OF_JOY]	0	1	2	0	3	relevant
اری شی حسود نباش ب شوهرم میگم	2	1	2	1	2	relevant
واقعا سخت شده فاطمه بیا بگو چجوری رفتی خونه شوهر [FACE_WITH_TEARS_OF_JOY][WOMAN_FACEPALMING]	1	1	1	0	3	irrelevant
: پسر بگه زن میخوام خوبه ، ولی دختر بگه شوهر میخوام بده ؟ یا چی :/ ؟ چرا ؟ ! چطور ؟	0	1	1	0	3	irrelevant
رو کن از همینجا شوهر پیدا شه واست ایمان جون	0	1	2	0	3	irrelevant
اینجا بحث من و شما نیست:)) بحث اینه که یه نفر خودش میخواد بدنشو به نمایش بذاره. پارتنرش هم راضیه یا نه ما نمیدونیم به خودش مربوطه. شما همه چیز رو زن و شوهری از نوع ایرانی میبینید و انتظار دارید هر کس مثل خودتون زندگی کنه. اگه من نمیپسندم دلیل نمیشه تو هم نپسندی.	0	1	2	0	3	relevant
من شوهر میخواستم واسه بچه	2	1	2	1	2	relevant
ببینید دوستان من اصلا پارتنر خوبی نیستم ولی اگر اکیپاتون یه کصخل مهربوم بغلی کم داره بنده در خدمتم	1	1	1	0	3	irrelevant
من با 36 سال سن کلا سه بار شمال رفتم دفعه سوم شب تو ترافیک دیر رسیدیم چالوس خونه نبود مجبوری رفتیم تو یه محوطه که مخصوص مسافرا چادر زده بودن لب ساحل چه چیزای حال بهم زنی که نبود چقدر ادم لش و لوش ریخته بود اونجا زن و شوهرا دعوا بچها ول تو محوطه ماشینا با صدای سیستم بلند بعد میگی	0	1	1	0	3	relevant
شوهر اون زنکه ابتکار یه شرکت دانش بنیان داره شتر با بارش از در میره و تو اونجا گم میشه. ده سال پیش طی یک فقره فقط طاها خان 600 میلیون از ننه باباش(تو بخون پول مفت مردم دست اینا) دزدیده بود باباش می گفت من می دونم پول کجاست فقط میخوام طاها بفهمه اینجا حساب کتاب داره بگه برداره!	0	0	3	0	3	irrelevant
تو حرف نزن تو شوهر داری [PENSIVE_FACE]	0	1	2	0	3	relevant
عجب عید تخمی ای حقیقتا ، دوست دخترم شیرازه خودم تهران و کل روز زیر پتو یا خوابم یا دارم فیلم میبینم ، من دیگه نمیخوام این زندگی رو بکنم.	2	1	1	1	1	relevant
گفتم برازنده است قرار نیست زنم بشه که [FACE_WITH_TEARS_OF_JOY][FACE_WITH_TEARS_OF_JOY]	1	1	0	0	3	irrelevant
خالم امروز بهم گفت که دیگه دیر شده همه هم سنات شوهر کردن خیلی وقته منم گفتم اره الان تایم طلاقشونه ایشالا دور بعدی میرسم بهشون و دیگه هیچی نگفت [ROLLING_ON_THE_FLOOR_LAUGHING][ROLLING_ON_THE_FLOOR_LAUGHING][ROLLING_ON_THE_FLOOR_LAUGHING][ROLLING_ON_THE_FLOOR_LAUGHING][ROLLING_ON_THE_FLOOR_LAUGHING]	1	1	1	0	3	irrelevant
ایشون که همسر 90 درصد تایم لاینن [GRINNING_FACE_WITH_SWEAT] exo is exo dont fight the feeling	0	0	3	0	3	irrelevant
دلت پره هاااا شوهرت مث اینکه شوهر خوبی نبوده [FACE_WITH_TEARS_OF_JOY][FACE_WITH_TEARS_OF_JOY][FACE_WITH_TEARS_OF_JOY]	0	1	1	0	3	relevant
کسی یه پارتنر با قد 179 و پاهای کشیده گم نکرده؟؟؟؟ بیاد من پیداش کردم بدم ببره سره خونه زندگیش [PLEADING_FACE]	1	1	2	0	3	irrelevant
: سلام دوستان ممنون میشم از کسب و کار همسر من حمایت کنین [RED_HEART] لطفا ریتوییت کنین[RED_HEART] املاک دیوان https://t.c…	2	1	2	1	2	relevant
امروز واسه دل بابا رفتیم دیدن عمه هام و دومی بند کرده بود به بچه 4 ساله هی میگفت این مرد توعه از کانادا تا اینجا مردت بوده! بچمم دو سه بار بهش گفت نه من بچه ام! ادم حس میکنه در حد حلزون بدون صدفه تواناییش!	2	1	2	1	2	relevant
هرچی از شوهر رسد نیکوست	2	1	0	1	0	relevant
تا وقتی زن هست چرا شوهر [WOMAN_GETTING_MASSAGE_LIGHT_SKIN_TONE]	0	0	3	0	3	irrelevant
بقول مهران مدیری تو مرد هزار چهره من بی گناهم، من بی تقصیرم [FACE_WITH_TEARS_OF_JOY][FACE_WITH_TEARS_OF_JOY][FACE_WITH_TEARS_OF_JOY][FACE_WITH_TEARS_OF_JOY]عروس و غیره میگره ماچ میکنه ادمو وسط جمعیت من چیکار کنم؟!!!! پسش بزنم ابروریزی میشه،نه زشتع، همراهیش کنی صحنه زیباتر و رمانتیک تر میشه[UPSIDE_DOWN_FACE][UPSIDE_DOWN_FACE][UPSIDE_DOWN_FACE][FACE_WITH_TEARS_OF_JOY][FACE_WITH_TEARS_OF_JOY][FACE_W…	0	0	3	0	3	irrelevant
همون که میگفت بیاین شورت شوهرم هم میدم بپوشید؟ :)	0	1	2	0	3	relevant
: از طرز فکرت خوشم میاد ولی اگه زنت بود چی [FACE_WITH_TEARS_OF_JOY]	0	1	2	0	3	relevant
من دوست دخترم دقیقا همین شکلیه. yes. i win	2	1	0	1	0	relevant
یعنی منشنای این پست و امثال این پستو میخونم کهیر میزنم از تفکرات مزخرف ملت تصورشون از ادمایی که قبل از ازدواج سکس دارن، افرادیه که تا جنس مخالف میبینن میپرن رو هم سکس میکنن چرا تموم نمیشن این احمقا؟	0	0	3	0	3	irrelevant
دلم برا شوهر سابقم تنگ نشده و دارم فراموشش میکنم [FACE_WITHOUT_MOUTH]	0	1	1	1	1	relevant
پارتنرم ناراحت شد دید سینه هام بزرگتر شده [CLOWN_FACE][CLOWN_FACE][CLOWN_FACE] همش میگه من کوچیک دوست دارم	2	1	1	1	1	relevant
: چرا پارتنر من نمیاد موهامونو ست رنگ کنیم	2	1	1	1	1	relevant
جواب شوهرت رو نمیتونم بدم [FACE_WITH_TEARS_OF_JOY][FACE_WITH_TEARS_OF_JOY][FACE_WITH_TEARS_OF_JOY][FACE_WITH_TEARS_OF_JOY]	0	1	2	0	3	relevant
تو دلت شوهر میخواد اینا همش بهانه ست	0	1	1	0	3	irrelevant
اسمش خرج نیست ارزشه ارزششش دختر اقدس خانومم النگوهاشو نو کرده بود چه شوهری داره خدایی	0	1	0	0	3	relevant
شوهر هست منتها یه دهه شصتی که خانزاده نیز هست و از لحاظ مالی و امکاناتی فول اپشن هم هست اما شما ها بهش میگین شوگر ددی	1	1	0	0	3	irrelevant
شوهرم مرده خیلی تنهام	1	1	1	1	1	relevant
میخوام از این به بعد تو توییتهام بجای شوهرم بنویسم این مرد، بجای بچه م بنویسم پسرک و شاهد صعودی شدن نمودار ایمپرشنم بشم	2	1	2	1	2	relevant
کنار تخت من یه پنجره هست که وقتی بیدار میشم پرده اش رو میزنم کنار تا نور بیاد تو اتاق،اقا بیدار شدم پرده رو زدم کنار دیدم برف میباره…	0	0	3	0	3	irrelevant
ترش نکنی دوتا شوهر داری البته که جو نگین دوست پسرمه	2	1	2	1	2	relevant
«دریچه/ فیلم» [MOVIE_CAMERA] پیام زن سالخورده ایرانی به مسولان جمهوری اسلامی: «من هم زنم من هم غرور دارم، دختر بزرگم گفت اگر مشکلاتمان حل نشود خودکشی می کنم. مسولان مرا نمی بینند؟» نان تورم معیشت گرانی خط فقر	0	1	1	0	3	relevant
با حرف تون موافقم که یه سری از خانمای مذهبی سخت میگیرن اما یه طرفه نباید نگاه کرد شما فکر میکنید اقایون مذهبی در انتخاب همسر سخت گیری ندارن؟	0	1	1	0	3	relevant
اگه کراشتو به پارتنر تبدیل کنی بردی	1	1	0	0	3	irrelevant
چشم و چراغ خونست من هر وقت مادرم خونه نیست هی از اتاقم صداش میزنم به امید اینکه جوابمو بده،حالا خونه نیستا از اونطرف پدرم داد میزنه اقا میدونی نیست که چرا هر پنج دقیقه صدا میزنی…	0	0	3	0	3	irrelevant
اینم کادوی عید من به همسرجان	2	1	0	1	0	relevant
: اری شی حسود نباش ب شوهرم میگم	2	1	2	1	2	relevant
همسرم چهل روزه معده ش درد می کنه فکر کنم بعد امیکرون شایدم دلیل دیگه داره دوسه روزه صبح ها چای بابونه می خوره ادامه بده خوب میشه دم نوش سیب هم استفاده میکنه چی براش ضرر داره چی خوبه لطفا ریت بزنین کسی که بلده جواب بده	2	1	2	1	2	relevant
ولی علی القاعده شما نمیتوانید شوهر رو بکنید	0	1	2	0	3	irrelevant
بچه من 7 سالشه. وقتی نوزاد بود واسه خوابوندنش من مینشستم اینور سالن و خانمم اونور سالن، بعد میزاشتیمش تو کالسکه و هل میدادیم سمت هم دیگه [GRINNING_FACE_WITH_SMILING_EYES] یه عکسی از خانمم در حال هل دادن گرفتم که هر وقت میبینمش خاطرات اون موقع مرور میشه	2	1	0	1	0	relevant
خطاب به دوست دخترم: داف نباش، اشپزی کن. همانا دستپخت خوب خودش هفتاد تا داف بودن ثبت می شه واسه اون دنیا [FACE_WITH_TEARS_OF_JOY]	2	1	2	1	2	relevant
به رفیقم گفتم ساعت یک شد، شوهر خالم از پشت بوته ها پرید بیرون گفت جدید یا قدیم؟	0	0	3	0	3	irrelevant
امروز خواهر همسر پرواز داشت از فرودگاه امام و خودش برنامه ریخته بود صبح تا ظهر بیاد پیش ما و بلیط هم گرفته بود! قسمت احمقانش این بود که اصلا به من نگفته بود!	2	1	1	1	1	relevant
مامانم میگه اگه فلانی شوهرش مرده پس چرا تو پیجش هیچی نذاشته؟! چی بذاره خب مادر من . بچه ها امروز شوهرم مرد، لایک و کامنت یادتون نره	0	0	3	0	3	irrelevant
حوصلم سر رفته لطفا شوهر من رو بدید برم.	1	1	1	0	3	irrelevant
مهموناتون با زن هاشون میخوابن؟ دیگه تو مهمونی خونه مردم چه معنی میده [WOMAN_SHRUGGING] تواتاق من زن وشوهر جدا بخوابن اتاقو باتمام لوازمش با وایتکس میشورم[ROLLING_ON_THE_FLOOR_LAUGHING][SEE_NO_EVIL_MONKEY]	0	1	2	0	3	relevant
عررر ابجیات زنی شوهری چیزی نمیخان؟ یا مثلا خانوادتون دختر دیگه ای نمخاد ب فرزندی قبول کنه؟	1	1	1	0	3	irrelevant
اتفاقا باهار نوشتن ادم حسابی ها و دلبر جان خیلی هم کولههه. دخدر لاشیا که مینویسن…کول که هیچ حال بهم زنم هستن خلاص جمع نبندیم =/	0	0	3	0	3	irrelevant
تنها ورژن خوب فامیل بابام داشتن تک دونه عمه خیلی خوبه که شوهرم هم نداره و فوق مهربونه و خیلی کمک مامانمه [RELIEVED_FACE]	0	0	3	0	3	irrelevant
اینا خانوادگی دماغشون تو همه چی هست ،همسر رییسی مثل پدر نامحترمش هست،	0	1	2	0	3	relevant
یه حرفی زدم بعد اون اقا به جای اینکه کمک را ببینه شروع کرد بحث های جانبی و سین جیم من [WOMAN_FACEPALMING_LIGHT_SKIN_TONE] عصبی شدم اومدم بیرون، زدم به همسر براش تعریف کردم گفتم می خوام برگردم دعواش کنم گفت نه ارزش نداره اما مگه من نگفتم هیچوقت حق نداری به کسی کمک کنی حالا فهمیدی کمک کردن غلطه[PENSIVE_FACE]	2	1	2	1	2	relevant
البته فامیلهای مادری من ترک هستند وعشق شوهر فکر میکنند شوهر نکنند از زندگی عقب میفتند تفکرات جاهلی برخی اقوام ایرانه متاسفانه باید باهاش مبارزه کرد بهاش را پرداخت	0	1	1	0	3	relevant
من هنوز نفهمیدم اونجا که چاووشی میگه "بیا تا رگ هامو تو خونت بریزم" یعنی چی اخه رگ و چجوری میریزن توی خون مَرد؟!	0	0	3	0	3	irrelevant
سن و سالم به 07/07/07 بیشتر میخوره. نه به کودک همسری.	0	1	1	0	3	relevant
فردا داریم میریم شمال خدمت خانواده همسر هم میرسیم، طبیعیه که من نگرانم دور از چشم من موای بچمو کوتاه کنن؟!!!!	2	1	1	1	1	relevant
البته من که می زنم برید یه فکری به حالتون کنید بدبختا.	0	0	3	0	3	irrelevant
داشتم حساب میکردم 1400 در کمال تعجب هیچ شخص نزدیکی نمرده که من تو مراسم خاکسپاریش شرکت کرده باشم و 1/1/1401 شوهرخالم خیلی یک هویی سکته کرد و مُرد! بله "سال رو بی بهار کردی" برامون… بله مرگ خیلی نزدیک و غریب و یک هوییه واقعا…	0	0	3	0	3	irrelevant
1) دوستم استوریم رو دید و برام ویس فرستاد که به شوهرت خیلی تبریک میگم بابت داشتن تو، چقدر خوشبخته… راستش برام جالب بود در این 16سالی که ازدواج کردم اکثر زنایی که باهاشون روبه رو شدم روی تم زنان علیه زنان بودند و عقیده داشتند این مَرده که اگه خوب باشه یه زندگی خوب به چشم میاد!	2	1	0	1	0	relevant
وا یارو جدا شده چطور حال بهم زنم؟؟؟؟	0	1	1	0	3	relevant
میخوام مثل سیاوش قمیشی، فرنگیس رو برای معشوقم بخونم ولی هیچکی نیست	1	1	1	0	3	irrelevant
ممنون رفیق جان،سال نو شما هم مبارک،ایشالا که سالی پر از سلامتی و موفقیت باشه براتون در کنار همسر محترم	0	0	3	0	3	irrelevant
یه دخترعمه داشتم که 24 سالگی با بیماری ای که هیچوقت نفهمیدیم چی بود از دستش دادیم علی دوسش داشت انگار از بچگی میگفته سمیه زن منه چندسال بعدش علی رو از دست دادیم و شماها هیچوقت نمیفهمین چه حس عجیبی درون من میگه که این دوتا یه جایی کنارهمن…	0	0	3	0	3	irrelevant
خدانکنه قشنگممم لقب خودتو به من نده زننن ولی همسر دلتنگت شدم یکم نبودی:(	2	1	0	1	0	relevant
قراره با پارتنرم برم کله پزی به امید خدااا	2	1	2	1	2	relevant
لامصبببببب دروغ استخون ندارد ک تو گلو گیر کند یا کنتور نمیندازد ک منم زیدم جنیفر گفت بیا خونمون من گفتم زشته خجالتی ام	0	0	3	0	3	irrelevant
زنم باز قهر کرده پیشم نمی خوابه. می گه تا قرص نخوری پیشت نمی خوابم. دروغ می گه. هر بار که قرصمو می خورم می ره.	2	1	1	1	1	relevant
بنیانگذار فرقه بابیت و بنیانگذار فرقه بهاییت گفت چند همسری کار خوبی نیست ولی خودشون چند همسر داشتن علی محمد باب، میرزا حسین علی نوری و عباس افندی گفتن برده داری ممنوع است ولی همه کارهای منزلشون رو برده های سیاه پوست اهل اتیوپی انجام میدادن انها بعد از مرگ پدرانشان،مالک بردگان شدن	0	1	1	0	3	relevant
داییم گفت زن نمی گیری؟ گفتم پسر خودت بزرگ تره؛ من نوبت رو به هم نمی زنم. گفت خاک تو سرتون.	1	1	2	0	3	irrelevant
دیگه وضعیت جوری شده زنِ طرف بره به غریبه بده هم برگرده به شوهرش، میگه از ته دلم به اون ندادم عشقم، من عاشقتم!	0	1	1	0	3	relevant
هر وقت مرد من خوشحال میشم اینا جون سگ دارن به همین راحتی نمی میرن	0	0	3	0	3	irrelevant
معلمم برگشت کشید کنار منو گفت تو باید موهات و بلند کنی برای شوهرت ناز کنی اون برات موهات و ببافه منی که هورمون درمانی شروع کرده بودم :	0	1	2	0	3	irrelevant
حالا من یه خبریو شنیده بودم یه زنو شوهر بعد سالهااااا طلاق گرفته بودن دلیل این بود که خانم میگفت شوهرش زیادی خوب بوده و همه چیش خوب بود و خوب بودن زیادی بینشون رو نمیتونسته تحمل کنه [FACE_WITH_TEARS_OF_JOY][FACE_WITH_TEARS_OF_JOY]	0	1	1	0	3	relevant
: ایشون که همسر 90 درصد تایم لاینن [GRINNING_FACE_WITH_SWEAT] exo is exo dont fight the feeling	0	0	3	0	3	irrelevant
شوهر تو بود خوب بود؟ [CONFUSED_FACE] حسود پلاستیکی	0	1	1	0	3	irrelevant
مثل ابی برای پول دست به هر کاری نزنیم، دست بکش مرد تو سنی ازت گذشته:(	0	0	3	0	3	irrelevant
مایل به چند همسری هستم.	2	1	2	1	2	relevant
سکوت کن هر چی زنت گفت بگو چشم ارههه الان میام	0	1	2	0	3	relevant
فقط من باید تاییدشون کنم وگرنه خانواده شوهر رو تهدید میکنم	2	1	1	1	1	relevant
: اینکه خیانت خیلی زیاد شده نشون میده داشتن یک زن یا شوهر برای تمام عمر با ذات انسان مغایرت داره نظر شما چیه؟!	0	1	1	0	3	relevant
شاید چون شوهر سابق و اکس حساب نمی کنم [DISAPPOINTED_FACE]	1	1	2	0	3	relevant
وا مث مادر شوهر سابق من میگفت نخورین واسه مهمونه [FACE_WITH_TEARS_OF_JOY]	1	1	1	1	1	relevant
بهار مگه فصل جفت گیری حیوونا نیست؟پس چرا من شوهر میخام	1	1	2	0	3	irrelevant
پارتنرم همش نگرانه که من یه وقت بهش خیانت نکنم. امروز رفتم بهش گفتم دیوونه اخه سگ با من دوست میشه که تو نگرانی؟نمیدونم چرا ناراحت شد…	2	1	1	1	1	relevant
: نه دوست دخترم هدیه داد ،نه بابام گرفته نه بهم کادو دادن نه مامانم گرفته خودم کار کردم و خریدمش [SMILING_FACE_WITH_HEART_EYES][SMILING_FACE_WITH_HEART_EYES]	2	1	2	1	2	relevant
پارتنر ندارم ولی خب اگه اینجوری بود خودم حاملش میکردم	1	0	3	0	3	irrelevant
سال نو رو امریکاییها تبریک میگن از اون ور دارو تحریم هست… قران بر سر نیزه و تا دلت بخواد ادم نادان هم هست در قرن 21 طرف میگه امریکا اگه دوست ما نبود تبریک نمی گفت خب بیچاره زنت جلو چشمت مُرد بچه ات هم داره میمیره بخاطر دارو بازم میگی ایراد از ماست؟ [NEUTRAL_FACE][NEUTRAL_FACE]	0	1	1	0	3	relevant
عوضش میگه چه شوهر گوگولی دارم من	0	1	0	0	3	relevant
دوست پسرم در کنار مامانش خیلی کیوتن..شبیه این دوتان	2	1	0	1	0	relevant
اتفاقا باید با شلوارک و دمپایی اومد که اگه یه وقت شوهر طرف رسید خونه سریع بتونیم بپوشیم فرار کنیم.	0	0	3	0	3	irrelevant
بیناموس اگه غیرت داشتی دخترت رو زیره دست خامنه ای و سلیمانی نمیزوشتی گوش کرت باز کن عراقی ها که با زنت سکس میکنن در مشهد مقدس میگن این هدیه خمینی به عراقی هاست حرومزاده ما رفتیم جنگ تا تو دزد فاسد از رژیم حمایت کنی پست فطرت	0	0	3	0	3	irrelevant
: هشدار به همسر ایندم… هرچی دیر تر بیای من بیشتر بدون تو میرم مهمونی و پارتی [BEAMING_FACE_WITH_SMILING_EYES]	1	1	1	0	3	irrelevant
عزیزان، امان از پارتنر پوشی و کنترل گر. امان.	2	1	1	1	1	relevant
امیدوارم بفهمید منظورم از شوهر چیه	1	0	3	0	3	irrelevant
خوب حبس ش هم کشیدم شش سال متاهلی که معادل 18 سال مجردیه [FACE_WITH_TEARS_OF_JOY]	2	1	1	1	1	relevant
غذای خوب، سکس منظم، عدم تحرک به خاطر مسیولیت ها و نداشتن زمان. من روز عقدمون 85 کیلو بودم. سه سال بعد 107 کیلو شدم. شکم خیکی چنان فشار عصبی بهم وارد میکرد که به خودم لعنت می فرستادم چرا ازدواج کردم اصلا. ولی همسرجان یک تغییر اساسی توی رژیم غذایی داد و ظرف 7 ماه به 90 کیلو رسیدم.	2	1	0	1	0	relevant
از این شرایط فقط یه شوهر دارم [FACE_WITH_TEARS_OF_JOY][WOMAN_FACEPALMING_LIGHT_SKIN_TONE]	2	1	2	1	2	relevant
شوهر پیدا کردی؟!	0	1	2	0	3	relevant
دختر و خواهرمم به خانوادم مربوط میشه نه هیچ کس دیگه، هروقت دختر یا خواهرت یا زنت (حتی رلتم نه) گذاشت اگه خواستی(اگه خواستی نه که بتونی و حقت باشه!) میتونی پاچشو بگیری، پس همون که گفتم، سرت تو سوراخ خودت قبل از اینکه کسی سرشو بذاره داخل سوراخت	2	1	2	1	2	relevant
من عاشق این زنم [PLEADING_FACE][SMILING_FACE_WITH_HEART_EYES]	2	1	0	1	0	relevant
سلامت باشید انشاالله همچنین برای شما و همسر و خانواده بهترین ها رقم بخوره	0	0	3	0	3	irrelevant
چرا زنم شب عیدی نمیرقصه برام	2	1	1	1	1	relevant
شوهر میکنم همینش خوبه	1	1	0	0	3	irrelevant
مخصوصا مبارک مادر شوهر با همچین عروسی که گیرش میاد	0	1	0	0	3	relevant
اینا رو همه شو می زنم گوگل ترنسلیت	0	0	3	0	3	irrelevant
واقعا وقتی تن خودتون، شوهرتون و بچه تون سر تا پا کرم قهوه ای میکنید خیلی خوش تیپ میشید	0	1	0	0	3	relevant
کسی که هیتر توت فرنگی زن منننن باشههن رو نگاییدمممم	2	1	2	1	2	relevant
حضور همسر و فرزندان معلم زندانی اسماعیل عبدی و فعالان صنفی معلم در لحظه تحویل سال در جلوی ندامتگاه مرکزی کرج عید نوروز 1401 مبارک باد	0	1	0	0	3	relevant
از اینکه تو چش کسی نگاه کنم بگم ازش بدم میاد ازادانه س چرا بعضیا ناراحت میشن وقتی صاف تو صورتشون میگم خوبیش به اینه پشت سر کسی حرف نمی زنم هم گردنم کلفت هم… ترسم از حرف زدن و عمل کردن نیس	0	0	3	0	3	irrelevant
عف رو زنت کراش زدم	0	1	2	0	3	relevant
: یکی از هزاران دلیلی که نباید شوهر مهشید بود	0	1	1	0	3	relevant
چقددد تو ب فکری همسرم [PENSIVE_FACE][PENSIVE_FACE][PENSIVE_FACE]	2	1	0	1	0	relevant
صدای داد و بیداد و دعوای زن و شوهرها رو چطوری حل میکنید [BEAMING_FACE_WITH_SMILING_EYES]	0	1	1	0	3	relevant
والا من با پوستم ، از دستم جدا می کردم تا همسرم با تینر منو اشنا کرد	2	1	2	1	2	relevant
اسم شوهر اومد گل از گلت شکفت بیخود،تا تهش ور دل خودم میمونی	0	1	0	0	3	relevant
: «داوش» جنسیت نداره تو میتونی دوست دخترم باشی من بازم قراره بهت داوش بگم	1	0	3	0	3	irrelevant
بــر قــدسیـان اسمان مــن هــر شبـی یـاهـــو زنــم گر صــوفی از لا دم زنـــد مــن دم ز الا هــو زنم	0	0	3	0	3	irrelevant
نه واقعا زن یه ذره عزت نفس داشته باشه با گروکشی مهریه زندگی نگه نمی داره. ولی بعضی خانواده ها سنتی اند و خانم نه خونه پدر اجازه کار داره نه همسر اجازه کار میده یا وظایف خونه و بچه ها به دوش زنه، مهریه برای اون دسته میتونه یه سهم از زندگی باشه.. منظورم خودم یا خانمهای شاغل نیستیم	2	1	1	0	3	relevant
من اگه همچین جایی داشتم دوست دخترم بیسچاری مهمونم بود :))	2	1	2	1	2	relevant
همسر مهربانم خبرهای جالب رو سعی میکنه خیلی ریز ریز و زرورق پیچ بهم بده، مبادا که خط مقدم جبهه اش رو یهو نابود نکنم. [SLIGHTLY_SMILING_FACE]	2	1	0	1	0	relevant
نچ بیب بزنمت قلبم خورد میشه	0	0	3	0	3	irrelevant
نیاز دارم با یه نفر دوست شم،که هم دوستم باشه هم پارتنرم"؛)	1	1	2	0	3	irrelevant
نباید بگم ببخشید چون متاهلی ولی لُپات خیلی قشنگه	0	1	2	0	3	relevant
زن من میشی	1	1	2	0	3	irrelevant
شاید زیاد حرف می زنم که اینجوری می کنن [PERSON_WITH_WHITE_CANE_LIGHT_SKIN_TONE]	0	0	3	0	3	irrelevant
میخوام برم برینم دهن اولین کسی که تو خونواده ایرانی جا انداخت، پارتنر داشتن چیز بدیه و بقیه نباید بفهمن.	2	1	1	0	3	relevant
قضیه دو طرفه اس..هم مردا باید تعهد رو بدونن..و هم زنا نباید با همچین مردی برن تو رابطه…خیانت کنیم خیانت میبینیم مرد و زنم نداره	0	1	1	0	3	relevant
یکی از بدترین دارایی های دنیا، داشتن یه پارتنر زودرنجه.. - یعنی خستگی همه چی توی تنت و ذهنت میمونه..	2	1	1	1	1	relevant
اتفاقا منم امروز همینو به همسرم میگفتم حالا که تو این تعطیلات شیفتم بیام همکارام رو…	2	1	2	1	2	relevant
داشتم تو کوچه سیگار میکشیدم ب خیال خودم منفی بودم، تا این بچه رو دیدم اصن خودمو یادم رفت، مرد تویی ستون [RAISED_FIST]	0	0	3	0	3	irrelevant
مگه شوهرت بیون نبود تو exo [SPARKLES] [SPARKLES]	0	1	2	0	3	irrelevant
به یاری حق تعالی که امسال کنسرت حاج اقا steven wilson کنسل نمیشه بزنم به تخته!	0	0	3	0	3	irrelevant
البته من به حالت طنز گفتم ولی یخورده جدی شد . حتما معیارهاتون فرق میکنه. ولی پارتنر خوب و مهربون نعمته. به هرحال جیگر شما [THUMBS_UP][GRINNING_FACE] سال سلامتی و موفقیت و خبرای خوش باشه براتون.	0	1	0	0	3	relevant
خانم منم دوباره ریدم تو کلم اشکال نداره [HANDSHAKE_LIGHT_SKIN_TONE]	0	0	3	0	3	irrelevant
پسرا با دختری که دوست دخترم بشه مخالفید یا موافق؟	0	0	3	0	3	irrelevant
باور میکنم استثنا وجود داره [BEAMING_FACE_WITH_SMILING_EYES] و باور کن از من خیلی رک میزان حقوق همسر.و اینکه خونه امون اجاره اس یا خریدیم هم پرسیدن	2	1	2	1	2	relevant
پس یک عدد شوهر خارج رو پلیر [PALMS_UP_TOGETHER]	1	1	2	0	3	irrelevant
واقعا ازدواج تو ایران کلا کنسله فکر کن همه این عیددیدنی ها دوبرابر شه فامیلای شوهرتم ببینی، نه ممنون واقعا.	1	1	1	0	3	relevant
انقد نزن تو سرم مرد:))))	0	0	3	0	3	irrelevant
شوهرم بیونه ولی زن میخوام از توییتر	2	1	2	1	2	relevant
شد شد ، نشد می رم apex می زنم.	0	0	3	0	3	irrelevant
با اینکه کلا ابی گوش نمیدم ولی این و متوجه شدم که عامل افت حرفه ای ابی همین همسر سلیطه و اون پسر پفیوسشه	0	1	1	0	3	relevant
از شوهر خالم یادگرفتم	0	0	3	0	3	irrelevant
ما به روز 20نفر میشدیم که بعد کرونا عید دیدنی هم نداریم ،یکی از ترسام خانواده ی شوهر شلوغه [SMILING_FACE_WITH_TEAR]	1	1	1	0	3	relevant
افراد متاهل میاند پیش من شب و روز از معایب متاهلی میگن منم میگم راستی چرا طلاق نمیگیری دیگه محو میشند. [WINKING_FACE][WINKING_FACE][WINKING_FACE]	1	1	1	0	3	relevant
من بهترین دوست و بدترین پارتنرم جریت دارین بیاین مخالفت کنین	2	1	1	1	1	relevant
شوهر زندگی	2	1	0	1	0	relevant
از زنم حمایت نکنم از کی حمایت کنم؟	2	1	0	1	0	relevant
صدای شهره اغداشلو نه تنها هیچ جذابیت یا زیبایی نداره بلکه ادم همه اش فکر می کنه ریه ها و تارهای صوتیش جرم و تار عنکبوت گرفته و ادم می خواد با یه برس و اسپری بیفته به جونش و بشوره تمیزش کنه [WOMAN_FACEPALMING_LIGHT_SKIN_TONE] . البته حدس می زنم مصرف سالیان طولانی سیگار هم از عواملش باشه.	0	0	3	0	3	irrelevant
اگه پارتنر ایندم خودشو لوس نکنه چی؟	1	1	1	0	3	irrelevant
الان هم بهم تو خونه گیر دادن که چرا در جواب کسایی که خصوصا تلفنی صدات میکنن هی میگی جان. گفتم عادت کلامیه والا واقعی نمی خوام جان بدم. البته اعتراضشون درسته اخه خیلی از خانما از اینکه نامحرمی بهشون بگه جان متنفرن. ممکنه این عادتم باعث دلخوری مخاطب خانمم بشه.	0	0	3	0	3	irrelevant
من و همسرم اذری و کرد هستیم.دو تا پسر هم داریم.چند سال پیش رفته بودیم اهواز.کنار رود کارون داشتم زیرانداز پهن می کردم که دیدم یک زن و شوهر جوان در حال صحبت با خانمم هستند.رفتم جلو گفتم چی شده؟ دیدم اقا و خانم میگن بیایید منزل ما و مهمان ما باشید، اصرار شدید و من هم معذب! نوروز	2	1	2	1	2	relevant
پلن اینه:شوهر کنم برم خونه شوهر و برای ی مناسبتی شوشوی بهم گوشی بده!باه باه [CLOWN_FACE]	1	1	0	0	3	irrelevant
زندگی بقیه << زندگی ما برای شام سوسیس سرخ میکردم زنگ زدم به همسرم که اومدنی نون هم بیار گفت خانوم من تو راه شمالم جمعه میبینمت :))	2	1	0	1	0	relevant
اگه همسرم برای توصیف کردن زیباییم از کلمات شت و فاک استفاده کنه طلاقش میدم.	2	1	2	1	2	relevant
اصلا شوهر کردن بقیه به شما چه!!!	0	0	3	0	3	irrelevant
از همسر گذشته روابط پورن هابم اینطوری نیس قفله	2	0	3	0	3	irrelevant
ارزو میکنم همسری مثل اقای من گیرتون بیاد [SMILING_FACE_WITH_HEART_EYES]	2	1	0	1	0	relevant
ولی اگه پارتنرم نزاره جوشاشو در بیارم چی [GRINNING_FACE]	1	1	1	0	3	irrelevant
من هنوزم میگم شوهر میخااام	1	1	2	0	3	irrelevant
خواستم بگم شمام اگه زن دیده بودین به این اضافه کاریا نمیگفتین زن. یادته بت گفتم زن اگه قلابی باشه از مردَم بدتره؟ زدی تو گوشم. عجب خری بودی دیوونه. زدی دیگه پکر شدم نگفتم یعنی تو قلابی نیستی. میخوام بات بشینم تو اتوبوس تا شمال حرف نزنم. رادیو چهرازی	0	0	3	0	3	irrelevant
قفلی می زنم با رخ روتون که عاشقش شین. بقول اقام قاف: نیــــــسّ کار شما….	0	0	3	0	3	irrelevant
کارگران و مصرف کنندگان می شود. حتی بدتر، سیاست تک فرزندی نه فقط شدّت بحران اینده را تقویّت کرد، که منجر به همه گیری سقط جنین انتخابی شد. اساساً درست در زمانی که اقتصاد چین رو به فروپاشی نهاده، ده ها میلیون نفر از مردان جوان قادر به یافتن شغل یا همسر نیستند، این در حالی است که در	0	0	3	0	3	irrelevant
بیاا منن خودم زنت مشمم	1	1	2	0	3	irrelevant
ایشالله دست پخت زنت به خوبی علی بزرگوار باشه	0	1	2	0	3	relevant
من دوست ندارم کون شوهرم رو ببینیم	2	1	2	1	2	relevant
زیر چن تا پسر خوابیده؟کجا بندو اب داده؟فرق شمای بدون سکس با جنده دم دستی؟این حجم توهین و نگاه فاجعه بار به انسان از کجا میاد؟ هر دختر و پسری حق داره برای زندگیش برای روابطش تصمیم بگیره هر دختر و پسری حق داره بخواد قبل ازدواج سکس و تجربه کنه.تعهد به همسری که وجود نداره معنا نداره	0	0	3	0	3	irrelevant
اقا یچی میگم نشنیده بگیرید بعدا هم یادم نیارید که اینو گفتم. شوهر دختر داییم خوب چیزیه	0	0	3	0	3	irrelevant
خواهر خانومم زنگ زدن میگه تولده پاشو بیا، میگم خواهرت طفلی تو تب داره میسوزه اینجا، من کجا بیام؟؟ میگه یه قرص بده بهش میخوابه به تو کاری نداره!!! بعد اسم خانواده شوهر بد در رفته… [GRINNING_FACE_WITH_SWEAT]	2	1	0	1	0	relevant
اسم عشقتو تو گوشیت چی سیو کردی؟؟ رل پارتنر	2	1	2	0	3	relevant
اول ببین چی باعث شد فکر کنی باید؟ ایا دیر شده ایا خیلی تنهایی؟ اگر چیزی مثل رابطه رو بخوای براش دلیل بزاری از سمت همون دلیل اسیب میبینی، خودشناسی، دیگر شناسی، داشتن معیار از سمت تو و پارتنر و معجزه ی گفت و گو میتونه نتیجه مثبت داشته باشه.	0	1	0	0	3	relevant
: ببخشید بچه ها دوست پسرم از من نود میخواد،نود چی هست؟	2	1	2	1	2	relevant
این خانم شوهر خوبی دارد و راضی است.	2	1	0	1	0	relevant
مردها نزدیک پایان سال خیلی بهم میریزند. بویژه شلوغی خانه ناشی از خانه تکونی خانمها بسیار اعصابشونو بهم میریزه. خانمها مراعات که نمیکنند غر هم میزنند. مرد در خانه ارامش و سکوت میخواد. این بنده پایان هرسال شدیدا خودمو کنترل میکنم که در دام های عصبی خانمم گرفتار نشم.	2	1	1	1	1	relevant
یه فامیل داریم وقتایی که دخترشو شوهر میده میاد عید دیدنی امسال باز یه دخترشو شوهر داده و بعد از سال ها به همراه داماد جدید اومدن عیددیدنی :)	0	0	3	0	3	irrelevant
سربازی اجباری تجاوز به همه شیون زندگی یه مرد توی ایرانه؛ نه تنها مقدس نیست بلکه ظلم اشکاره و هر کسی امر و عامل و مدافع اونه توی این تجاوز شریکه و من به سهم خودم حلال نمیکنم و راضی نخواهم شد؛ حق من به عنوان حق الناس گردن همه اونهاست. این از سهم من…	0	0	3	0	3	irrelevant
تازه وسطش دسشویی هم باید بری بعد خواب عوض میشه نتیجه میگیرم شوهر زیاد خوفه [ROLLING_ON_THE_FLOOR_LAUGHING][ROLLING_ON_THE_FLOOR_LAUGHING][ROLLING_ON_THE_FLOOR_LAUGHING][ROLLING_ON_THE_FLOOR_LAUGHING][ROLLING_ON_THE_FLOOR_LAUGHING]	2	1	0	1	0	relevant
اخه خب لرا مرد بزک کرده ندیدن به اشتباه فک کردن خانومه و رفته یه شوهر باعیرت پیدا کنه بین لر ها [GRINNING_FACE_WITH_SWEAT][GRINNING_FACE_WITH_SWEAT][GRINNING_FACE_WITH_SWEAT]	0	1	2	0	3	relevant
موقعیت چی میگه حاجی برو خودت کار کن و بدبخت نشو ازدواج یعنی بدبختی کدوم کسخولی ازادی شو میده می ره شوهر می کنه البته اینا نظر منه ولی شوهر کردن باعث نمیشه موقعیت بهتری داشته باشی شاید حتی بدبخت تر بشی پس عاقلانه انتخاب کن یا اصلا انتخاب نکن و تا اخر عمرت با خودت زندگی کن	0	1	1	1	1	relevant
تکمیل کردن زبان فرانسه نوشتن چند مقاله در رابطه با رشته ام پیش بردن مقاله انگلیسی ایم گرفتن مدرک ttc ادامه تدریس ام و اینکه از شوهر کردن فرار کنم [FACE_WITH_TEARS_OF_JOY][FACE_WITH_TEARS_OF_JOY]	1	1	1	0	3	relevant
وسط سکس به دوست دخترم گفتم کجا بریزم؟ گفت به کارت صادراتم. همونجا پشمام ریخت	2	1	2	1	2	relevant
ایران زمین چنان در تاریخ جهان ریشه دارد که هرکس با ریشه ان عناد بورزد تبر به ریشه خود زده است. نمونش هم همین ابی. اخه مرد تو چی به سرت اومده که چنین مزخرفی از دهنت بیرون اومد! ی روز با خوندن خلیج فارس به عرش برسی و روز دیگه با نخوندنش به فرش.	0	0	3	0	3	irrelevant
زن تو خودت عکس وقتی موهام کوتاه بودو گذاشته بودی رو اسمم	0	0	3	0	3	irrelevant
از تو میپرسن بگو شوهر نیست	0	1	2	0	3	irrelevant
با همه چی شوخی می کنند اسید پاشی کودک همسری چند همسری و… تا اطلاع ثانوی از پیشرفت خبری نیست	0	1	1	0	3	relevant
تقریبا عصر پیام داد که یکی از دوستاش از من خوشش اومده و گفته شرایط تو رو بپرسم. منم تو همون حالت گیجی جواب دادم. یه سری پارامتر هارو گفتم و تاکید کردم فعلا دنبال پارتنر نیستم و میخوام تنها بمونم و از این داستان ها و سعی کردم بپیچونم به طریقی.	1	0	3	0	3	irrelevant
یه اخلاق حسنه ای دارم، هر جا سفر می کنم باید تا جان در بدن دارم اونجا رو بگردم. همسر جان اخر شب اخطار دادند که فردا فقط قراره از صبح تو ساحل باشیم و هیچ جا نریم.	2	1	0	1	0	relevant
قابلتم ندارم هروقت عاقد اوردی بگو خانمم از قبل بله رو دادهههه	0	1	0	0	3	irrelevant
کاری ب زنت ندارم من حسودی میکنم اونجا باشه نمیام	0	1	1	0	3	relevant
پرستاره به مرده میگه متاسفم خانمتون فوت کرد مرده میگه فدای سرتون خودتون که چیزیتون نشده؟	0	1	1	0	3	relevant
این پشه بی پدر، هم خودش منو نیش می زنه، هم خودم به جای اینکه اونو بزنم هی خودمو کتک می زنم. [WOMAN_FACEPALMING_LIGHT_SKIN_TONE]	0	0	3	0	3	irrelevant
"مثلا من و همسر سابقم" 4سال با خون جگر کار کردم و خونه خریدم هدف جفتمون این بود از خونه ی پدرم بریم تو خونه ای که خودمون خریدیم یکماه بعدش مهریه اش و گذاشت اجرا و خونه و ماشین و طلاها رو زد و رفت	2	1	1	1	1	relevant
زن منم لنگه تویه. هروقت میگم ول کن سرویسمون کردی میگه هرچی که گفتم و رسیدیم دیگه نگاه میکنم میبینم حق میگه ولی به روی خودم نمیارم [ROLLING_ON_THE_FLOOR_LAUGHING][ROLLING_ON_THE_FLOOR_LAUGHING]	2	1	1	1	1	relevant
چقد این سکس پارتنر خوبه از کجا میشه پیدا کرد [DROOLING_FACE]	1	1	0	0	3	irrelevant
اکس اگه خوب بود اکس نمیشد ، شوهر بشه؟	1	1	1	1	1	relevant
اگه خانواده ی همسرم ازینایی باشه که هیچ فامیلی نداشته باشن روزای عید از شدت عیددیدنی رفتن له نشیم چی؟ :(	1	1	1	0	3	irrelevant
لیلا [ROLLING_ON_THE_FLOOR_LAUGHING][ROLLING_ON_THE_FLOOR_LAUGHING][SMILING_FACE_WITH_HEART_EYES][HEART_SUIT] عمرا! شوهر بخت برگشته ی من به پسرامون میگه ایشالا زنی گیرتون بیاد که شخصیت محکمی داشته باشه مثل مادرتون. و این دو نوجوان نگاه عاقل اندر سفیه بهش میندازن [FACE_WITH_ROLLING_EYES]	2	1	0	1	0	relevant
خانم من سوال کردم چ وضع پاسخ دهیه	0	0	3	0	3	irrelevant
- اگه زنم خواست برا عروسی دستشویی رو تزیین کنه استوری بزاره چیکار کنم [LOUDLY_CRYING_FACE][FACE_WITH_TEARS_OF_JOY] (خز ترین کار بعد ازدواج به نظرتون چیه؟!)	1	1	2	0	3	irrelevant
خب مسلما همسرم هم از همون خانواده اس دیگه [ROLLING_ON_THE_FLOOR_LAUGHING] یادم نمیاد اونجا بیدار دیده باشمش	2	1	2	1	2	relevant
لابد ازت پرسیده چرا شوهر نمیکنی!	0	1	2	0	3	irrelevant
ب نظره من میمونه منم از تنهایی میترسم پس شوهر میکنم	1	1	1	0	3	irrelevant
اگر پارتنرم انقد بیکاره بذار ببینه پس… لیاقتشو داره [PENSIVE_FACE][FACE_WITH_TEARS_OF_JOY]	2	1	0	1	0	relevant
مگه شوهر کنی دیگه نمیتونی درس بخونی خو برو درستو بخون [FACE_WITH_TEARS_OF_JOY]	0	1	1	0	3	irrelevant
یه وقتایی قلبم نمیتونه حجم علاقمو به پارتنرم تحمل کنه و مجبورم یکم برینم تو عصابش تا یکم جا باز شه نتیجه : اخلاق وی گوه است	2	1	1	1	1	relevant
: باشه ولی فمنیسم بودن به این منظور نیست که من از یه مرد و پسر بالاترم به این منظور من هم به اندازه یک پسر و مرد تو زندگی حق…	0	0	3	0	3	irrelevant
همش همسر اینده منو تنبیه میکنین وقت نمیشه دو کلوم گپ و گفت بزنیم :))؛	1	1	2	0	3	irrelevant
خانواده همسرم مذهبی اند به خاطر همسرم روسری سر می کردم،امروز رفتم عید دیدنی شالمو در اوردم تا کردم نشستم جو بسیار سنگین شد [FACE_WITH_TEARS_OF_JOY][FACE_WITH_TEARS_OF_JOY] دیگه برای هیچ کس کاری که دلم نمی خواد رو نمیکنم	2	1	1	1	1	relevant
زیدمون کجا بود سید من از اول تنهای تنهای تنها بودم	1	0	3	0	3	irrelevant
بنده رشتی ام و واقعا زنم گاییده شده از خنده	0	0	3	0	3	irrelevant
بچه فامیل دستبرد بزنت بانووووووو	0	0	3	0	3	irrelevant
باهرنگاه بر پیشانی تو هزار بوسه میزنم من عشقم را دلارم را از صدای تو میگیرم [FACE_WITH_TEARS_OF_JOY][FACE_WITH_TEARS_OF_JOY][FACE_WITH_TEARS_OF_JOY] مهشید خرس گنده خلیج همیشگی فارس	0	0	3	0	3	irrelevant
بیا برات سکس با زنت و دخترت برات بزارم مثل اینکه اجاره خونت ندادی احتیاج به 100 دلاری داری البته به رییسی و علم الهدی هم باید بابت بکارت دخترت به عراقی ها پول بدهی بیناموس حرومزاده ناموست به عراقی هدیه دادی دخترت مگه چندسالشه	0	0	3	0	3	irrelevant
ببین همه کار انجام میدم دیگه ، شوهر پیدا می کنم ، زن پیدا می کنم ، طلاق مردمو می گیرم ، خطبه می خونم ، ازدواج ثبت می کنم ، همه چی خلاصه	0	1	2	0	3	relevant
: نه دوست دخترم پخته، نه مامانم، نه خریدم، خودم پختم [PIZZA]	2	1	2	1	2	relevant
استمداد همسر رییس جمهور اوکراین از شورای جهانی کلیساها	0	0	3	0	3	irrelevant
هیچکس کرم نداره. بحث اعتماده عزیزم. اگر به پارتنرت اعتماد نداری تمومه. ناشناس و اینا نمیخواد.	0	1	1	0	3	relevant
چقدر خوبه شوهرت اینقدر تحسینت میکنه [FACE_BLOWING_A_KISS][ROSE]	0	1	0	0	3	relevant
حرفاشون رو به یک جاییت بگیر و سعی کن موفق بشی تا بقیه موفقیت رو تو شوهر کردن نبینن	0	1	1	0	3	relevant
عید دیدنی شروع شد مادر شوهر و زخمی کردی	2	1	1	1	1	relevant
به زیدم بگین علاوه بر اجیل واسش چند تا ویدیو مسیجم کنار گذاشتم	2	1	2	1	2	relevant
یادش بخیر20 سالم که. بود بعد سال تحویل با دوست دخترم رفتیم بیرون باباش دیدمون بعد چهارتا تو گوشی که بهم زد گفت اینم عیدیت بعدم به دخترش گفت عزیزم بیا بریم خونه	2	1	1	1	1	relevant
هر اهنگی که پارتنرم دوست داشته باشه، میزارم که دوچندان لذت ببرم	2	1	0	1	0	relevant
صرف شده دیگه الان شوهر می خوان	0	0	3	0	3	irrelevant
نه دیگه واسه خودت میخوام ببینم با اینکه قرمه سبزی رو بلدی شوهر کردی یا نه اگه نه که منم یاد نگیرم	1	1	2	0	1	irrelevant
اشکال نداره فقط سریع تر بری پیش شوهرت	0	1	2	0	3	relevant
: این زن تو فهمیده بودن حریف میطلبه [PINCHED_FINGERS][FACE_WITH_TEARS_OF_JOY] [FILM_PROJECTOR] thedanishgirl	0	0	3	0	3	irrelevant
مثلا الان بنیان خانواده اینجا خیلی قویه؟ امار ریدمون اجتماعیشون در این زمینه با 300 میلیون جمعیت،از80 میلیون ما کمتره.دختری که1هفته عروسی میکنه مهریشو میذاره اجرا.پسری که چند همسری تبلیغ میکنه.65% امار طلاق 2 سال گذشته.اخوندی که میگه بیا صیغت کنم اسم شوهرتو از شناسنامت پاک میکنم.	0	1	1	0	3	relevant
مرد اشغالی اومد جنازشو برد از بوی گندش اشغالی هم مرد زنش اومد گفت خاک تو سرم شوهرم مرد بچه اش اومد گفت اخ جون بابام مرد [ROLLING_ON_THE_FLOOR_LAUGHING][LOUDLY_CRYING_FACE]	0	1	1	0	3	relevant
اره به سال نکشیده زن تو نو شوهر میدن و دخترتون رو عروس عربها میشه خوشبحالتون	0	1	1	0	3	relevant
احساس میکنم داری تحقیق میکنی بزنی تو کار چند همسری	0	1	2	0	3	relevant
جفتشون شوهر دارن فرقی نمیکنه من بگم کی… [SMILING_FACE_WITH_TEAR][BROKEN_HEART]	0	1	2	0	3	relevant
همیشه دوست صمیمی من دوست پسرم بوده همراه خرید تفریح ددر مسخره بازی هررر کاری برای همین وقتی که دیگه نبود من انقدر تو فشار بودم	1	1	0	1	0	relevant
حالا کو شوهر من ی چیزی گفتم تو باور نکن [FACE_WITH_TEARS_OF_JOY][WOMAN_WALKING]	1	1	1	0	3	irrelevant
اقا توییت بزارید ریت بزنم این توییتم اگه میشه ریت بزنین بقیه ببینن دمتون گرم [FOUR_LEAF_CLOVER][HANDSHAKE_MEDIUM_LIGHT_SKIN_TONE]	0	0	3	0	3	irrelevant
خیلی درسته اکثر زن و شوهرا شبیه ب همن [THINKING_FACE]	0	1	2	0	3	relevant
سلام اقا هنگام ورود به boot لپ تاپم هر چی f3 و f4 و f8 میزنم نمیره لپ تاپم hp هست	0	0	3	0	3	irrelevant
خب بگو همسرم انقدر سخت متعهد باشی ؟؟؟؟	0	1	1	0	3	relevant
اگه زنم مثل کاربر ته دیگ خوشگل نرقصه چی ؟	1	1	0	0	3	irrelevant
خب من چرا باید غلط بزنم دوست پسر تورو ببینم؟!	0	1	2	0	3	relevant
زنت دیگه زنه منع [SMILING_FACE_WITH_TEAR] مرسی[SMILING_FACE_WITH_TEAR][PEOPLE_HUGGING]	0	0	3	0	3	irrelevant
باشه ولی من تا وقتی دستتو توی دست یه شوهر اسلیو نزارم دست برنمیدارم. خوشبختیت از هرچیزی برام مهمتره	0	1	0	0	3	irrelevant
شوهر بیاد تو بزرگراه گم میشه	2	1	2	1	2	relevant
به رشتیه میگن دیشب زنتو تو باغ عباس اقا گاییدن میگه اووووو به اون دو تا دونه درخت میگی باغ؟	0	1	1	0	3	relevant
نه زن من تورو یادم نمیره [NEUTRAL_FACE][FACE_WITH_TEARS_OF_JOY] بوس به کلت	0	0	3	0	3	irrelevant
به پسره میگن رفته بودی خواستگاری چرا اینقدر خجالت میکشیدی میگه اگر تو هم هرروز از پدر زنت کاندوم خریده بودی سر جات ریده بودی	2	1	2	0	3	relevant
شوهر کردی دلقک تمام وقت که نگرفتی	0	1	1	0	3	relevant
بن افلک ول میکردی کم کم از تو فیلم در میومد مارو هم میکشت چون طرفدار انا دارماسیم حامال اون خوشگله ی زمانی زنت بوده بفهم deep water فیلم خوبی بود حتما ببینید warning:خطر هورنی شدن بعد دیدن فیلم	0	0	3	0	3	irrelevant
دوست من داره همسر دوم میگیره و از من خواسته تو عروسیش کمکش کنم… به نظرتون چکار کنم؟ چند همسری	0	1	1	0	3	relevant
حسی که ارضا و ارگاسم شدن پارتنر به مرد میده یه چیزی تو مایه های اسکندره که فاتح جهان شده .	2	1	0	1	0	relevant
بهشون حق بده طبیعیه که نگرانت باشن اصلا هم تو کارها عجله نکن و اصلا رویاپردازی نکن و مراقب باش خانواده همسر خیلی تو زندگیت مهمن،خوب بسنجشون	0	1	2	0	3	relevant
این باز دورش شلوغ شد منو یادش رفت زن من یروز میرینم بهت میذارمت کنار خیلی صبورم فعلا	0	0	3	0	3	irrelevant
پنجاب میں جب کسی خاتون کا شوهر مر جاتا هی تو اسی "رنڈی" کها جاتا هی کچه زنده شوهر والی بهی رنڈی هوتی هیں! [ROLLING_ON_THE_FLOOR_LAUGHING][ROLLING_ON_THE_FLOOR_LAUGHING][ROLLING_ON_THE_FLOOR_LAUGHING][ROLLING_ON_THE_FLOOR_LAUGHING][ROLLING_ON_THE_FLOOR_LAUGHING][ROLLING_ON_THE_FLOOR_LAUGHING][ROLLING_ON_THE_FLOOR_LAUGHING][ROLLING_ON_THE_FLOOR_LAUGHING][ROLLING_ON_THE_FLOOR_LAUGHING]	0	0	3	0	3	irrelevant
پدر و همسر تاجدار هم که از پشت تو عکس نظاره گر هستند و دعاگوی ملت اصیل ایران . بَه بَه	0	0	3	0	3	irrelevant
عصر جدید یه زن و شوهری اومدن رو سن علیخانی ازشون میپرسه اسمتون رو تو گوشی هم چی سیو کردین؟ زنه گفت معجزه ی من و مرده گفت گل نرگسم. پشمام ریخت	0	1	0	0	3	relevant
عید شما مبارک در این خصوص اردلان جان من حرف نمی زنم تاریخ این سرزمین حرف می زند.	0	0	3	0	3	irrelevant
میگن برای داشتن همسر خوب از امام رضا بخواید	0	1	0	0	3	irrelevant
اِکس و نکست و دوست پسرم اوریتدن حتا شوهر همه از دم اورریتد!	2	1	1	1	1	relevant
منم از 2 فروردین در جوار خانواده همسر هستم ان شاالله که خوش میگذره	2	1	0	1	0	relevant
به خاطره همه ی زن ها و مادرهایی که از پا نیوفتادن… مادران شهدا [RED_HEART] همسران شهدا [YELLOW_HEART] همسران جانبازان [GREEN_HEART] زنگ طلایی عصر جدید	0	0	3	0	3	irrelevant
یه توصیه به خانوما برای همسر یا شریک زندگیتون خوش بو خوش رو خوش گو خوش تو باشید بیشتر مردا ارایش همسرشون « برای دوام رابطه» در اخر اهمیت قرار داره اما بوی خوش و رفتار گشاده و خوش زبانی و خوش بستری در درجه اول اهمیته پس بیشتر از اینکه خرج ظاهرتون کنید، خرج اینایی که گفتم بکنید	0	1	2	0	3	relevant
بانو میا خلیفه و همسر جدیدشون	0	1	2	0	3	relevant
اولا که خانم میگه ولی کو مردی که عمل کنه، ثانیا زندگی مشترک اگه واقعا مشترک باشه، و همسر شریک این زندگی همه چیز برای دونفره، درسته هدف زندگی مشترک سوزوندن عمر نیست همونطور که هدف تقسیم بندی مال و اموال نیست	0	1	2	0	3	relevant
اوووف صیغه. زفاف زیر چادرای راهیان نور. من یه اشتباه کردم وارد بسیج و این راهیان هانشدم. هر شب پاهای دو سه تا از زنان مومن ولایتمدا رو بالا بزنم.	0	0	3	0	3	irrelevant
اینا لو لولای خزانه ان که در تعداد بالا پرینت سه بعدی شدن و به اسم شوهر به ما دخترا غالب/قالب میکنن	0	0	3	0	3	irrelevant
میدونید چرا نیستم؟ چون اخرین روزای سال رو به بد ترین شکل ممکن سپری کردم و اولین روزای سال رو هم به افتضاح ترین شکل ممکن شروع کردم وقتی فهمیدم همسر رفیق چندین و چند سالم از دنیا رفته. هیچ حسی به هیچ مناسبتی و هیچ شخصی ندارم فقط بهش پیام میدم و میگم شرمندتم رفیق	0	1	1	0	3	relevant
همش خلاصه میشه توی همون "مالی". راستی حال همسر گرامیتان چطور است؟!	0	1	2	0	3	relevant
گفتم برت او نسل خر زن همه سپاه پاسداران ت را هم بگایم از پشتونهای خاین مثل تو را هم مشکل اینجاست پدروپدرانت خر بودند و هستند که نمی فهمی با وجودی که غنی بابایت فرار کرد باز هم افتخار میکنی سرش زن و مردتان را گایم	0	0	3	0	3	irrelevant
به یه پارتنر نیاز دارم فارغ گرایش و جنسیت٫ فقط بغلم کنه و بهم عشق بورزه	1	1	0	0	3	irrelevant
بهم گفت: تو از معدود ادم هایی هستی که دوست دارم باهاشون حرف بزنم من حرف نزن:)))) و چند درجه زیباتر شدم ^ ^ این زن به نظرم از تیر و طایفه فرشتگانه :))	2	1	0	1	0	relevant
drteimourzadeh: : به نمایندگی از جوانپزشکان داوطلب معترض ازمون دستیاری49 (خود ملت)، به پشتوانه ی قانون اساسی و حکم قطعی دیوان عدالت اداری توی دهن وزیر متخلف و مستنکف بهداشت و معاون اموزشی اش می زنم. خلاف نکن! مقابل قانون می ایستی؟ حکم ق…	0	0	3	0	3	irrelevant
مخصوصا یه مدرکی رو امضا می کنند که اموال قبل از ازدواج هر کسی شامل تقسیم نباشه. من توصیه میکنم کسانی که از همسر قبلی بچهاینده. چه زن و چه مرد، حتما امضا کنند چون دارایی قبل از ازدواج حق بچه هاست و نه همسر اینده. prenuptial agreement	0	1	1	0	3	relevant
زی بچیم همی نفر ره خو ده نفر میشناسه… تو خو دروازه خانه ات ره هم بزنی زنت پنجاه بار پرسان میکنه کی هستی چه میخواهی… چرا شما قوم ابله ادم نمیشین؟	0	0	3	0	3	irrelevant
: پسری که به پارتنرش عشق میده،کصلیس یا زن ذلیل نیس! بَلَدِ پارتنرشه و وظیفه عاشقیشو انجام میده.	0	1	0	0	3	relevant
این روابط عادی هست یا نه و درست و غلط هست یا نه به من و شما ارتباطی نداره ، بنظرت درست نیست؟ اوکی تو نداشته باش ، بنظر منم درست نیست و ندارم [OK_HAND] اعتمادا از بین میره؟! میترسی پارتنرت خیانت کنه اونم به واسطه این اتفاق؟! اگه بنظرت اینا بدن خب چرا رل میزنی؟ برو ازدواج کن چون-1	0	1	1	0	3	relevant
: حسی که ارضا و ارگاسم شدن پارتنر به مرد میده یه چیزی تو مایه های اسکندره که فاتح جهان شده .	2	1	0	1	0	relevant
دیگه صدای بچه بشنوم نعره می زنم	0	0	3	0	3	irrelevant
بنده در تحویل دادن سال در عشق کردن با همسر خود بودم	2	1	0	1	0	relevant
هرچی ما میتوانیم به شوهر تبدیلش کنیم. ازالان جلو ضررو بگیری منفعتههه	1	1	1	0	3	irrelevant
اره میمونن. وقتی عقده نداشته باشن. به خاطر خود طرف اومده باشن تو زندگیش، نه بخاطر مهریه، نه فرار از خونه بابا، نه اینکه ویرجین باشه بعد سکس بگه عه من اینقدر سکس خوبه میخوام الان که شوهر دارم دورامو بزنم. کسیم نمیفهمه چون پرده ندارم. ایناس مشکل. عقده گشایی	0	1	1	0	3	relevant
مسویدال مث سگ تو اکتاگون کتک میخوره میره بیرون به صورت غافلگیرانه مشت میزنه تو سر و صورت بقیه.زشته دیگه یه بار کرد همه خندیدن دیگه هی میره میافته دنبال مردم بزنتشون خجالت بکش مرد 40 سالته ادم شو کسکش	0	0	3	0	3	irrelevant
همانطور در اندراب و پنجشیر از اقایان افراطی طالبان راضی من هروز رنگ میزنم دلم بیشتز از شما میسوزد	0	0	3	0	3	irrelevant
اگه لباسای زیدم طمع کردنی نباشن چی	1	1	1	0	3	irrelevant
اینکه خوبه دوست پسرم به من میگف با فلان دوستت زیاد صمیمی نشو ..بعد که از دوستم ضربه خوردم…هی میگفت دلم خنک شد حقت بود [UNAMUSED_FACE] ولی دور از شوخی خیلی از حرفاشون حقه با اینکه خودم همیشه مقاومت میکنم در مقابلش هی میخوام بگم من بهتر میدونم ولی اخر اون به حرفاش باز میرسه :/	2	1	1	1	1	relevant
«نژاد شریف اریایی» ؟!!! [EXPLODING_HEAD] من دقیق در مورد این نژادگرایی بی معنی و مسخره افراطی حرف می زنم که می تواند ریشه نوروز را بکند. تا وقتی این هتلر در درون این « اریایی» پنداران نژادگرا زنده است، از تروریسم طالبان و دیگر گروه های افراطی نباید ترسید. این ها خطرناک تر از همه اند.	0	0	3	0	3	irrelevant
اگر شوهر تو رفیق صمیمی من نشه و باهام فیفا نزنه و زن من رفیق تو نشه و دعوا راه بندازه و نتونیم اکیپ بشیم زندگی برام بی معنی و مزخرف میشه ولی ولی ولی مطمینم این اتفاق مزخرف نمیفته و یه اکیپ دوست داشتنی درست میشه که کلی خاطره جدید ساخته بسازیم	0	1	2	0	3	relevant
: پرستاره به مرده میگه متاسفم خانمتون فوت کرد مرده میگه فدای سرتون خودتون که چیزیتون نشده؟	0	1	1	0	3	relevant
: از زن رشتیه میپرسن شما موقع عشق باز ی با شوهرتون صحبت میکنین؟ میگه اگه زنگ بزنه معلومه	0	1	2	0	3	irrelevant
ههه همشم میگن کی درست تموم میشه چرا سر کار نمیری چرا شوهر نمیکنی	1	1	1	0	3	irrelevant
مهمان نوازی فقط بی بی فطمه زهرا که به تمام انصار و مهاجران خدمات جنسی رایگان ارایه میدادند. ایشان الگوی همسر شهید حججی و دختر قاسم سلیمانی هستند :)	0	0	3	0	3	irrelevant
بچه هایی که برای زبان خوندن (انگلیسی یا هر زبان دیگه ای) نیاز به پارتنر دارن اپِ tandem رو نصب کنن. واقعا جوابه.	0	0	3	0	3	irrelevant
عب نداره ولی ببین من الان زنم ولی رفیق درستی برای رفیقامم	2	0	3	0	3	irrelevant
مامانم زنگ زده بود به بابام ابراز دلتنگی کرده بود بعدبغض کرده از دلتنگی بعد بابام زنگ زده وسط ماموریتش که چرا میزارید مادرتون دلتنگ باشه ناراحته نبینم زنم حالش بد باشه ببرینش بیرون هواش عوض شه دورش باشید تا من برگردم حقیقتا از دیدن و گفتن این صحنه پشم نموند برام [PLEADING_FACE][PINCHED_FINGERS_LIGHT_SKIN_TONE][BROKEN_HEART]	0	1	0	0	3	relevant
: + خانم من دوقرنه درگیرم - درگیر چی؟ + درگیر شما	0	1	0	1	0	relevant
خب اگه گفت شوهر کن تا اون برات جق بزنه چی؟ [FACE_WITH_TEARS_OF_JOY]	0	1	2	0	3	irrelevant
عه کدوم پدرسگ نفهمی گفته مرد اولویته زن تو سری خور	0	1	1	0	3	relevant
اون مرد منظورم نبوداااا منظورم این بود نامرد نباشیم [BLUE_HEART]	0	0	3	0	3	irrelevant
ببخشید اگه کس دارید و ناخناتون بلنده و پارتنر ناخن کوتاه یا سکس توی ندارید، میشه بگید چه جوریییییی؟	0	1	1	0	3	irrelevant
: زنم باز قهر کرده پیشم نمی خوابه. می گه تا قرص نخوری پیشت نمی خوابم. دروغ می گه. هر بار که قرصمو می خورم می ره.	2	1	1	1	1	relevant
به همسر ایندم بخند [MAN_FACEPALMING][FACE_WITH_TEARS_OF_JOY]	1	1	2	0	3	irrelevant
به قول یکی مترجمان رسمی متاسفانه 75 در صد زوج های افغانستانی از هم جدا می شوند. در جاییکه بودیم یک زن و شوهر میانسال تهرانی که یک پسر کوچک هم داشتند در اثر اختلاف از هم جدا شدند و بنده خدا مرد تنهایی به تهران برگشت! [PLEADING_FACE]	0	1	1	0	3	relevant
ما پارتنرامون اینجوری باشن احتمالش به همسر شدن 99درصده [ROLLING_ON_THE_FLOOR_LAUGHING] دوست و رفیق چیه	2	1	1	1	1	relevant
1)کراش زنم خراب شده 2)کسی روم کراش نمیزنه 3)رفیقام سینگلن ی جورایی خیانت میشه 4)کسی30ساله کون سفید ارمی نیست 5)سنم کمه میترسم از همه رابطه ها	1	1	1	0	3	relevant
پس چرا شوهر خالم به بچه ها کوچیک شیطون می گفت	0	0	3	0	3	irrelevant
امین امین خدا به هممون یه شوهر خوب نصیب کنه بالتعجیل [SMILING_FACE_WITH_TEAR][FACE_WITH_TEARS_OF_JOY]	1	1	0	0	3	irrelevant
: خانما جواب بدن اگر همسرتون بیمار بشه و راه درمانش گرفتن همسر دوم باشه اجازه میدین؟	0	1	2	1	2	relevant
دلیل خاصی داشت که گفتم همسر ایندم [PENSIVE_FACE]	1	1	2	0	3	irrelevant
من باید یه شوهر کرمونی پیدا کنم از وقتی اومدم اینجا پوستم خیلی خوب شده [FACE_WITH_TEARS_OF_JOY] هواش بهم میسازه	1	1	2	0	3	irrelevant
دوست پسر من ته لهجه عربی داره حرف زدنش قشنگ تحریکم می کنه [BEAMING_FACE_WITH_SMILING_EYES] لهجه عرب های ایران خیلی سکسیه	2	1	0	1	0	relevant
گولاخ سایبری پانتورک اسراییلی! ؟ همسرم تبریزی است عردوغان یهودی گرجستانی و شماها با هزینه من بروید ازمایش ژنتیک بدهید اگر خون تورکی داشتید هر چه گفتید درسته!؟ 80 درصدتان ایرانی تبار هستید زبانتان ترکی شده است و انگلیس و سوروس هدایتان میکند هووووون!!!	2	0	3	0	3	irrelevant
زن دارم هلن جون زنم [EYES]	2	1	2	1	2	relevant
زنم ظهر رفت خونه ی باباش, زنگ زد گفت داری میای اون روسری سبزه که سال تحویل سرم کرده بودمو غروب بیار برام. منم که یادم نبود کدومو میگه, دو تا روسری سبز از رو چوب لباسی برداشتم بردم. حتما می دونید چی شد دیگه؟ :)))))	2	1	2	1	2	relevant
میگفت دوست پسرم اصلا نمیگه عاشقتم اصلا نمیگه دوست دارم ، تو دلم میگفتم ازون پسرای بزن در روعه ولی حالا میبینم پسره شده مرد زندگیش و چقدر خوشبختن منظور شاهنامه اخرش خوشه	0	1	0	0	3	relevant
من نیستم حریف زبانت، مگر زنم از بوسه مُهر بر لب حاضرجواب تو	0	0	3	0	3	irrelevant
امروز داخل تایملاینم کلی اتفاق افتاد که اومدم زیر همه اون توییت ها منشن گذاشتم مبارک باشه. یکی ازدواج کرده بود یکی موبایل خریده بود یکی ایرپاد گرفته بود خیلی بودن الان بقیش یادم نیست خواستم بگم یه روز هم من میام توییت میزنم که شما بهم بگین مبارک باشه :))	0	1	2	0	3	relevant
کیونگسو و جونمیون شوهر من هستن. شما هم نمیتونید کاری بکنید جز فشار خوردن [TWO_HEARTS]	1	0	3	0	3	irrelevant
یه سوالی از خانم ها، لطفا جواب بدین: "اگه زمان ازدواج شوهرتون همه حقوق خودتون رو بهتون بده باز مهریه و شیربها میخواین؟ اگه اره چرا؟"	0	1	2	0	3	relevant
همسرِ حجت الاسلام والمسلمین "ابراهیم رییسی" به دلیل تحمل بی قید و شرط ابراهیم در تمامیِ این سال ها، جایزه ی نجیب ترین ملکه ی جهان را در فستیوالِ زنِ روز فرانسه دریافت.	0	1	0	0	3	relevant
اگاسِز میخوام این خبر خوش و باهاتون شیر کنم منو شوهرم دیشب بچه دار شدیم [NAZAR_AMULET][NAZAR_AMULET][NAZAR_AMULET][NAZAR_AMULET][NAZAR_AMULET][NAZAR_AMULET][NAZAR_AMULET][NAZAR_AMULET] بچه هامون[NEST_WITH_EGGS] got7	2	1	0	1	0	relevant
شما چه پولدارید میرید تنیس با همسر جان :))))) ما اگر همسرجان بیاد نهایت بدمینتون تو سیزده بدر بریم :)))	2	1	1	1	1	relevant
شاید چون هم دوست دختر میخوام هم خوب بلدم مخ بزنم [CIGARETTE]	1	1	2	0	3	irrelevant
عشقم نصف پسرها اینجا وارزوشون اینه شوهر تو بشن زیبا خوشگل	0	0	3	0	3	irrelevant
والا ما هم شوهر داریم چهل تومن بسته نت فعال کرده میگه همون عیدیت [ROLLING_ON_THE_FLOOR_LAUGHING]	2	1	1	1	1	relevant
الان دیگه کسی سنتی ازدواج نمیکنه یعنی ی ادم نرمال نمیکنه اینکارو! همون دوس پسر تبدیل ب شوهر میشه	0	1	2	0	3	relevant
بدبخت که شوهر من باید بیس چاری غذا بخره	2	1	1	1	1	relevant
بخدا رفته بودم سقاخونه دعا کنم، شمعی که نذر کرده بودم واسه تو اداااا کنم دروغ نگو دروغ نگو دروغ نگو تورو به خدا گولم نزن هی میگن پشت سرت از مرد و زن تورو با رقیب منننن دیده ان تو جاجرود که با اون گرم سخن نشسته بودی لب رود [PENSIVE_FACE]	0	0	3	0	3	irrelevant
من با پسرم نگاه می کنم،خانمم به خنده های ما میخنده [BEAMING_FACE_WITH_SMILING_EYES][BEAMING_FACE_WITH_SMILING_EYES][BEAMING_FACE_WITH_SMILING_EYES][BEAMING_FACE_WITH_SMILING_EYES]	2	1	2	1	2	relevant
وای اره دنی من دانشگام تموم شده بعد میپرسن تموم شدد؟منم میگم اره بعد میپرسن خببب میخوای چیکار کنی شوهر سرکار درد مرگ وای	1	1	1	0	3	irrelevant
از دخترا ایرانی خیلی میسوزم ، پدسگا خیلی دستشون بازه برای انتخاب پارتنر	0	1	1	0	3	irrelevant
چند سالته مگه که میخوان شوهرت بدن؟	0	1	1	0	3	irrelevant
با شوهرم میرم کنسرت و نایت کلاب و بعدشم که مشخصه با شما دوتا فقط برنامه جنده بازیه.	2	1	2	1	2	relevant
به خاطر کار همسرم چند ماهی هست که شهرستان ساکن هستیم.منطقیه که روز اول فروردین خونه پدری من باشیم. خاله عزیزم پشت تلفن به مادرم گفتن" یاسی هم این مسیر رو صاف کرد از بس اومد اونجا" ولی نمیدونست گوشی روی اسپیکره! مرسی کرونا که باعث شدی یه سریا رو نبینم دیگه.	2	1	2	1	2	relevant
شوهر نمونه: تخمهایی رو که جفتش گذاشته توی دهنش نگهداری میکنه تا وقت بدنیا امدنشون برسه - فیلیپین	0	1	0	0	3	relevant
بعد اینکه من اخرین باری که ایران پاسپورت گرفتم، چون پاسپورت قبل از اون رو خارج از ایران گرفته بودم، اجازه همسر نمی خواست. الان نمی دونم قانونشون تغییر کرده یا چی	2	1	2	0	3	relevant
به تو میگن پارتنر نمونه	0	1	0	0	3	relevant
چقد خوبه ادم زنو شوهر باشن بدون بچه تا اخر من ب نامزدم گفتم بچه نمیخوام ترکم کرد	1	1	1	1	1	relevant
یعنی یه ذره ابرو جلو شوهر دوستم داشتیم که دیگه همینم نداریم وجدانا این چه حرکتیه که گوشیاتون رو میدین شوهراتون	0	1	1	0	3	relevant
نمیدونم درست فهمیدم یا نه ولی فکرکنم میخوای بگی وقتی طرف تجربه نداره ممکنه دختره اذیت شه.. ولی خب بازم بالاخره باید با یکی اولین تجربه شو داشته باشه دیگه حالا بعضیا ترجیح میدن اولین بار با همسرشون باشه و یکم زشته ادم پارتنرش رو (همسر نه)یه حریف تمرینی ببینه ..	0	1	2	0	3	relevant
و واقعا با هیچکس مثل همسرم بهم خوش نمیگذره، و با هیج کس خوش نمیگذره وقتی همسرم نیست! درک نمیکنم چرا برای بعضیا اینطوری نیست	2	1	0	1	0	relevant
پاشو برای منم شوهر پیدا کن پس	1	1	2	0	3	irrelevant
من همیشه گفتم نازا نیستیم ماها [WOMAN_ZOMBIE] فقط یه شوهر نداریم[FACE_WITH_TEARS_OF_JOY][WOMAN_FACEPALMING_LIGHT_SKIN_TONE]	1	1	1	0	3	irrelevant
درحال حاضر همسر مرغم ابپزم [NAUSEATED_FACE][EXPRESSIONLESS_FACE] صب ب صب بیدار میشه یه لگد میزنه میگه ضعیفه وخی ناهارو بذار	2	1	1	1	1	relevant
جالب اینه که خانمم به شدت رعایت می کرد و حتی با وجود زایمان هم چاق نشد. واسه همین عقیده دارم اگر رژیم غذایی رعایت کنن چاق نمیشن.	2	1	2	1	2	relevant
اوهوم واقعا.من امسال متاسفانه برای چند روز جایی هستم همسرم همراهم نیست.واقعا جاشون خالیه.	2	1	1	1	1	relevant
و ترور او مطرح کرد، در حالت عادی نبود و مست بود و از روی مستی حرف می زد و امیدوارم ان حرف ها را جدی نگیرید. من و شوهرم حاضریم هرگونه همکاری با شما داشته باشیم، اما به این شرط که تضمین بدهید برای انتقام از ما برنامه ریزی نکنید 4/4	2	1	2	1	2	irrelevant
من اگه یه غریبه بهم بی دلیل فحش بده انقد ناراحت نمیشم که پارتنرم یا دوستم تو بحث و دعوا بهم فحش بده	2	1	1	1	1	relevant
با همسر یهودی تبارش (جزو لژ فراماسونری) اخرین عامل برای تکمیل پلان برای تقسیم روسیه بود. با سر کار امدن او ابتدا شوروی فرو پاشید و در امتداد ان با متشنج کردن جامعه، برای همسو شدن با پلان هنری کسینجر، برای تقسیم روسیه ، تا با این پلان قدرت دوم نظامی جهان فروپاشد .	0	1	2	0	3	irrelevant
خانم منصوری یا نمیدانید یا خودتان را به ندانستن زده اید این جشن ایرانی است اخوند که ایرانی نمیشه واعتقادی به نوروز ندارند	0	0	3	0	3	irrelevant
به همسرم گفتم خودت مدیریت کن به من بگو [WOOZY_FACE]	2	1	2	1	2	relevant
برو پیش شوهرت [WOMAN_WALKING_LIGHT_SKIN_TONE]	0	1	2	0	3	relevant
ملت عاشق این رقصای ظریف همسر متریالن	0	1	0	0	3	relevant
دیشب دوست پسرم از تماس تصویریمون فیلم گرفته و من توی یک دقیقه انقدر ناز و عشوه دارم که خودم هم ندیده بودم :))))))))	2	1	0	1	0	relevant
این توییتای پارتنر قد بلند و کوتاهو ول کنید اگه یکی دلتونو ببره اخرین چیزی که براتون میتونه مهم باشه قدشه!	0	1	0	0	3	relevant
مرسی عزیزم من دلم پسر میخواد که شوهره دخترمو بیشتر دوست نداشته باشه [GRINNING_FACE_WITH_SWEAT][GRINNING_FACE_WITH_SWEAT][GRINNING_FACE_WITH_SWEAT][GRINNING_FACE_WITH_SWEAT]	1	1	1	0	3	relevant
خب شاید اون موقع که تو دوس داری دیگه شوهر نباشه درکل ازدواج زود خوب نیس	0	1	1	0	3	relevant
نه دیگه فامیلای ما اگه گفتی اره میخوام یا نه نمیخوام،بیخیالت میشن ولی اگه همچین با قر و عشوه خرکی و یه ریزه خجالت گفتی کو شوهر؟ ینی اماده ی رفتن قاطی مرغایی	1	1	2	0	3	irrelevant
میدونی جالب چیه . بعد یه سال فهمیدم دو تا دوس پسر دیگه داره . یکم بعدم فهمیدم شوهر داره [NEUTRAL_FACE][NEUTRAL_FACE][NEUTRAL_FACE]هنوز فک میکنم تنم میلرزه [FACE_WITH_TEARS_OF_JOY]	1	1	1	1	1	relevant
دیگه باس زحمت چایی رو هم بگمانم خودتون بکشین!! بدجور وقت شوهر کردنت شده چون! گرچه سال خوب و شیرینی داشته باشی، مث همین شیرینی های بودن خودت. سلامت و موفق باشی.	0	1	2	0	3	irrelevant
پارتنر میتونه همسر هم باشه. هرکدوم سکس بلد نباشن اون یکی اذیت میشه. و وقتی بعد ازدواج تازه مزش بیاد زیر دندونشون، کارایی رو که تو مجردی باید باهاش عقده گشایی میکردنو الان تو تاهل میکنن. میرن خیانت خانم بازی و… ولی اگه دلشون سیر باشه بخاطر سکس نمیرن تو تاهل. واسه عشق میرن	2	1	1	0	3	relevant
نههههه زن من میمونه ولی درکنارش زن تو بودنم ادامه میده [PENSIVE_FACE][SMILING_FACE_WITH_TEAR]	0	0	3	0	3	irrelevant
همیشه فانتزیم این بود که وقتی یه عروسی ای چیزی هست و منم اماده ام و پیرهنمو پوشیدم، با پارتنرم تو اتاق یه دور بترکونیم و بعد بریم مراسم :))	1	1	0	0	3	irrelevant
اخه نیومده داره حرف میزنه اینجا ننوشته اگه شوهر بد بود اگه شوهر خرجی نمیداد گفته همه ی شوهههرررراااااا	0	1	2	0	3	irrelevant
من بله نمیگم ولی میگم انشاا… به حق ابروی فاطمه زهرا یه شوهری خوبی پیدا کنی ک پاره تنت باشه . نیمه گمشدت باشه . درکت کنه . باعث شادی و انرژیت باشه . از لحظه لحظه زندگی باهاش لذت ببری	1	1	0	0	3	irrelevant
می گفتم خانم می شه یه جای دیگه بشینین، من منتظر همسرم هستم.	0	1	0	0	3	relevant
حاج خانم من زن دارم شوهر ندارما.	2	1	2	0	3	relevant
بیا یه شوهر خوب همینجا برات پیدا کنیم پس	0	1	0	0	3	irrelevant
ز دوریِ تو نَمُردم ، چه لافِ مهر زنم؟ که خاک بر سرِ من باد و مِهربانیِ من..	0	0	3	0	3	irrelevant
زن و شوهر چرا باید استوری بذارن همو تگ کنن عید نوروز رو بهم تبریک بگن مگه باهم زندگی نمیکنن مگه پیش هم نیستن این دیگه چه صیغه ایه؟؟؟	0	1	1	0	3	relevant
زید و دوست پسر و شوهر قبول نیست. [UNAMUSED_FACE]	0	1	2	0	3	irrelevant
داود در محراب خود کبوتری زیبا دید و خواست او را بگیرد تعقیب کرد و به دنبال او به پشت بام رفته و چشمش به زنی افتاد که در حال استحمام بود. زیبایی زن او را حیرت اورد و بعد از تحیر عاشق او شده و درباره او تحقیق انجام داد، معلوم شد که شوهرش از نظامیان داود و در جبهه جنگ حضور دارد.	0	0	3	0	3	irrelevant
تو بیا این موخوره ی موهاتو من بگیرم قول میدم همه جا بگم برای شوهرت مهمی	0	1	2	0	3	relevant
اه یاد اون دوستم افتادم که به دوست پسرش میگفت همسرم تاج سرم، بعد یهو دختره دو هفته غیب شد فهمیدیم همسرش ول کرده رفته همسر یکی دیگه شده (عقد کرده) برگامون ریخت :)))	0	1	1	0	3	relevant
مگه مرد تو خونه حق اظهارنظر یا تغییر دکور داره؟!	0	1	2	0	3	relevant
پارتنرم اینقدر باهام مهربون و خوبه و هر شرایطی باشه باهاش کنار میاد و بی حوصله میشم اعتراضی نمیکنه و قشنگ و خوش صدا و خوش تیپ و هنرمند و باهوشه که باورم نمیشه همچین شخصی اصلا وجود داشته باشه چه برسه به این که پارتنرم باشه.	2	1	0	1	0	relevant
یک پیشنهاد سکسی برای سوپرایز شوهر و خرید یک وسیله جدید برای خونه که یاد بگیره وقتی تو خونه نون نیست،ول نکنه بره شمال عشق و حال:)))	2	1	1	1	1	relevant
خب، اولین ترکوندن سال رو داشتیم. ایول به خودم. یکی از پدرای شاگردام طوری پیام می داد که مشخص بود مرض داره. مامانم گفت بگو شمارتو به شوهرم میدم:)) ولی به عنوان زنی که دوس نداره پشت مردش قایم بشه، شخصا ترتیبشو دادم و راضیم.	2	1	2	1	2	relevant
به دختره ی بی لیاقت گفتم فردا بیا اینجا برات قرمه سبزی می پزم، گفت میخوام برم پیش دوست پسرم [CLOWN_FACE]	0	1	2	0	3	relevant
برو از شوهر واقعیت عکس بده از جونگینی دور شووو	0	1	2	0	3	relevant
تو بیا زنم باش	1	1	2	0	3	irrelevant
من 24م کسی حق نداره اسم شوهر بیاره جلوم	1	1	1	0	3	irrelevant
جایزه نوبل متعهدترین همسر رو باید بدن به ریچارد رتکلیف همسر نازنین زاغری 6 سال همه جوره برای ازادی همسرش تلاش کرد و خسته شد،متاسفانه اگر این مرد ایرونی بود 1ماه پیگیر میشد ماه دوم با رفیقای خانمش که پیگیر بودن وارد رابطه میشد،چند تا این وسط صیغه میکرد و…بعد میگن اروپاییا سردن	0	1	0	0	3	relevant
حالا مگه قراره خیلی خوب باشه؟ رقاص حرفه ای نیست که. الان تو مهمونی این ادم برقصه من خودم دورش وایمیسم دست می زنم حال می کنم.	0	0	3	0	3	irrelevant
دیگه متاهلی دایرکت نمیتونم بیام مجبورم همین جا بپرسم [FACE_WITH_TEARS_OF_JOY]	0	1	2	0	3	relevant
مکالمه ی هر شب من و زنم بعد مهمونیا تو ماشین: زنم: اینقدر دور نزن, دیگه بزرگ شده, تو ماشین نمی خوابه. من: مجبوریم تا صبح دور بزنیم دیگه.	2	1	2	1	2	relevant
که قرار نبود همسرم باشه و من واقعا دلم میخواد برگردم و اون اشتباهه و تکرار نکنم. این چیزایی که میگی همش بعد چند بار سکس برطرف میشه اگر هر دو طرف بخوان	2	1	1	1	1	relevant
خانم رو نمیگم اونی رو میگم که به خاطرش به همسرش خیانت کرده	0	1	1	0	3	relevant
دو دستی بچسب بهش مرد زندگیه. ملت شوهراشون براشون یه پرایدم نمیخرن چه برسه به این [FACE_WITH_TEARS_OF_JOY]	0	1	0	0	3	relevant
عه کسی که زنم نشد	1	1	2	0	3	irrelevant
یه پارتنر درست حسابی و پایبند باس پیدا کنی. ولی خب، البته میتونی ابزار الات جنسی هم بخری.	0	1	2	0	3	irrelevant
گوه خوردی در دهن پدر و مادر تو لندغر بی هویت سگ شاشه کند تو حرامی کولابی سگ بگیل واری گریختی زنت را پیش برنارد لیفی هنری و ایریک پرنس بردی که شاید سگ خود واری ناز بدهدت اما بر رویتان تف هم نکرد، بی ناموس شینگری زاده	0	0	3	0	3	irrelevant
: شد، شد. نشد شوهر میکنم به یه شیرازی.	1	1	2	0	3	irrelevant
چرا اطلاعات همسر منو دادی زنیکه؟	2	1	2	0	3	relevant
در خود به جست وجویی پیگیر همت نهاده ام در خود به کاوشم در خود ستمگرانه… من چاه می کنم من نقب می زنم من حفر می کنم.	0	0	3	0	3	irrelevant
do you remember when you joined twitter? i do! mytwitteranniversary بعد دوسالگی توییتریم فهمیدم که برای پیدا کردن دوست دختر و پارتنر و زید و رل نباید تو خیابونا دنبالش گشت، باید تو اسپِیس توییتر پلاس بود و تا خرتناق منشن کرد.	1	1	2	0	3	irrelevant
فردا من ریت می زنم براتون بلکه شاید فیو استار بشه ایشالا	0	0	3	0	3	irrelevant
اون مرد توبه بکنه گناه تجاوزش بخشیده میشه ؟	0	0	3	0	3	irrelevant
فقط بیا بگو زن من کو [LOUDLY_CRYING_FACE][LOUDLY_CRYING_FACE]	1	1	2	0	3	irrelevant
سنا تو بجای شوهر زن تصور کن [FACE_WITH_TEARS_OF_JOY]	0	1	2	0	3	irrelevant
یه بار این اتفاق افتاده بود زن وشوهر تو جمع دعوا افتادن بزن بزن خواهرزاده من 3/4ساله ش بود تا الان دعوا ندیده بود طفلی انقدر ترسیده بود ما هاج واج مونده بودیم [GRIMACING_FACE][GRIMACING_FACE]	0	1	1	0	3	relevant
مگه شوهر شاهزاده رویاهاست که بخوای باهاش به جایی برسی .ازدواج یه زندگی مشترک هست با پستی و بلندی هاش	0	1	2	0	3	relevant
بعد من میشم ادمی که میخواد یه نوار خامو پر کنه. ادمی بی تجربه و تابو زده. و نتیجش میشه یا من خسته میشم. یا اون میگه شوهرم دیکتاتوره میذاره میره. و… شما تا تو شهر و استان و کشور مقام نیاری المپیک نمیتونیبری. به همین سادگی	2	1	1	1	1	relevant
خداروشکر دوست پسرم خوابه و منو در این وضعیت روانی غیر استیبل نمیبینه. چون هرچی تو دهنم بیاد میگم.	2	1	1	1	1	relevant
بقیه رو مقاسیه میکنن میگن مثلا طرف 18 سالگی شوهر کرد به به و چه چه .بابام مثلا تحصیلکردس ازون توقع نداشتم ولی اونم این حرفارو زد	0	1	1	0	3	relevant
: با خودم زیاد حرف می زنم. هیچ کدوممون قانع نمی شیم.	0	0	3	0	3	irrelevant
بسه دیگه، زنت به اندازه کافی جندگی کرد حوصلمو سر بردی. سیکتیر.	0	1	1	0	3	relevant
بگو من از وقتی این کیک رو گرفتم دیگه شوهر نمیخام	0	0	3	0	3	irrelevant
من نصف شب= یعنی من همونقدر که از شوهر خالم بدم میاد دختر خالمم از بابام بدشون میاد؟	0	0	3	0	3	irrelevant
با اندوه فراوان از درگذشت شادروان دکترصدرالدین الهی استاد پیشین دانشکده علوم ارتباطات، نویسنده و روزنامه نگار برجسته اگاه شدم. فقدان این نویسنده و روزنامه نگار نامدار را ازصمیم قلب به همسر گرامیش عترت الهی، فرزندان برومندش تسلیت می گویم. روانش شاد و یادش پایدار	0	0	3	0	3	irrelevant
من حتی شوهر خالمم بود سعی نمیکرد بخندونتمون	0	0	3	0	3	irrelevant
دلم میخواد برم بهش بگم عنتر منم ناز میرقصما نمیخوای زنت شم؟	0	1	1	0	3	irrelevant
درباره ی ارزش بدن زنم شما باید تصمیم بگیرید که چی کمش می کنه چی زیاد؟ اینهمه عکس نود تو توییتر و هرکشوری استار میشه و فقط اینجا میگن بدن زن بی ارزش میشه، بدن هیچ جنسیتی با عکس نود بی ارزش نمیشه.	0	0	3	0	3	irrelevant
دوست عزیزم وقتی شوهر میکنی ما خوشحال میشیم با دیدن عکساتون ولی پیویش و خودش رو داری که بهش ابراز علاقه کنی نرفتی مریخ فتح کنی که یه دول هس همش انقد استوری کصشر نکن تو کون ما.	0	1	1	0	3	relevant
من رشت زاکم، رشتی گب زنم دبخی لهجه انه بلد نیام [FACE_WITH_TEARS_OF_JOY][FACE_WITH_TEARS_OF_JOY][FACE_WITH_TEARS_OF_JOY]	0	0	3	0	3	irrelevant
طرف اومده میگه مایل به سکس؟! میگم نه میگه چرا میگم چون پارتنر دارم میگه الهی بمیره [NEUTRAL_FACE][NEUTRAL_FACE][EXPRESSIONLESS_FACE][EXPRESSIONLESS_FACE] جد و ابادت بمیره پدرسگ چشم نداری ببینی داری میسوزی از کون بسوووز بسوز	2	1	0	1	0	relevant
ماشالله [SMILING_FACE_WITH_HEART_EYES] اینجا من با دوست دخترم در دبی بودم	2	1	2	1	2	relevant
امسال همسرم، جواب تبریکهای کپی پیستی رو طوفانی داد. ویس گذاشت اگه برام اهمیت و ارزش قایل نیستید که حتی یه خط تایپ کنید یا یه ویس ده ثانیه ای بدید، لطفا تبریک نگید. شاکی طور، بی اعصاب، کرونایی	2	1	2	1	2	relevant
ان شاالله هرکس که دوسداره یه همسر خوبم نصیبش بشه	0	1	0	0	3	irrelevant
اگه ازدواج یه قرارداد یک ساله بود حاضر بودی بازم با همسرت تمدیدش کنی ؟	0	1	2	0	3	relevant
دوست پسر شفت سگم یک ساعت پیش گفت بیست دقه زنگ میزنم	2	1	1	1	1	relevant
بعد همین ها اگه طرف دختر فالو نداشته باشه میگن یا پارتنر داره یا گیه	0	0	3	0	3	irrelevant
بیا شوهر بی وطنت رو جمع کن این وسط ،خلیج عربی؟؟؟؟؟؟	0	1	1	0	3	irrelevant
: من نصف شب= یعنی من همونقدر که از شوهر خالم بدم میاد دختر خالمم از بابام بدشون میاد؟	0	0	3	0	3	irrelevant
خانم که سر کار بره شما کارها رو باهاش نصف نصف انجام می دید؟ رسم بدیه که خانم بعد یک عمر خدمت هیچی نداره و اگر شوهر بیرونش کنه یا فوت کنه زن در به در میشه	0	1	1	0	3	relevant
حالا بود کدوم دوس پسری شوهر میشه الان	0	1	1	0	3	irrelevant
کل قضایای اخیر ابی و خلیج فارس و… نشون داد چقدر انتخاب همسر و همراه درست، مهمه. خیلی مهمه اقا، خیلی.	0	1	2	0	3	relevant
پسر فامیلمون تازه پش لبش سبز شده عکس بک گراندمو دیده با مسخرگی می گه بی تی اسه ؟ گفتم فوضولیش به تو نیومده توله من به شوهرم جواب پس نمی دم، تو واس من شاخ شدی؟	2	1	2	1	2	relevant
خب بیا دیسکورد من همینطوری زر می زنم تو مرتب کن :))) ایزی :)) البته همین الان نه، دفعه ی بعدی :)))	0	0	3	0	3	irrelevant
اقااااا من کراش زدم رو پارتنر [SMILING_FACE_WITH_HEART_EYES][SMILING_FACE_WITH_HEART_EYES][SMILING_FACE_WITH_HEART_EYES] بهش بگو	0	1	2	0	3	irrelevant
تو بذار من با پنج تا اکانت فیو می زنم.	0	0	3	0	3	irrelevant
شماها دست از وحشی بازی بردارین و پاچه نگیرین، مطمین باشید اونام مثل ادم با شما رفتار میکنن (فقط خواستم یه کم مثل خودتون حرف بزنم که بفهمی هرکسی توهین و تحقیر بلده، مودب باش ادب مرد به ز دولت اوست)	0	0	3	0	3	irrelevant
یکی از تصوراتم که خوشبختانه عملی شد ارضا کردن پارتنرم از عقب بود ینی انقد دوس داشته باشه که ارضا شه what a bitch! [STAR_STRUCK]	2	1	0	1	0	relevant
درسته خوب قر میدین ولی فیس و افاده تون زیاده شوهر گیرتون نمیاد	0	0	3	0	3	irrelevant
زن و شوهری که تو 60 سالگی هر شب با هم دعوا دارن چه اصراریه زیر یه سقف بمونن؟ مگه بیمارید لامصبا؟	0	1	1	0	3	relevant
سونگو ولش کن :| تو زن منیییییی :| با گل و حلقه امده ام [SMILING_FACE_WITH_SUNGLASSES][FIRE]	0	0	3	0	3	irrelevant
حقیقتا ذوق کردم ولی متاسفانه اینا همش کذبه زنم کجا بود	1	1	0	0	3	irrelevant
به به علی خان ، دیروز همسر ، امروز غریبه رهگذر !! [FACE_WITH_RAISED_EYEBROW]	2	1	1	1	1	relevant
فک کنم فقط من سیمپ نکردم که تا بازار سیمپ داغه دوست دارم زنم بشی	1	1	2	0	3	irrelevant
و اما عنوان ضایع ترین و سمی ترین رییس جمهور قرن هم بااختلاف میرسه به این شخص [FACE_WITH_MEDICAL_MASK][FACE_WITH_MEDICAL_MASK][FACE_WITH_MEDICAL_MASK][INDEX_POINTING_UP] و عنوان مقاوم ترین بانوی جهان هم که 24 ساعت در معرض گازهای گلخانه ای هنوز مقاومت کرده میرسه به همسر این شخص[FACE_WITH_MEDICAL_MASK][FACE_WITH_MEDICAL_MASK][FACE_WITH_MEDICAL_MASK][SNEEZING_FACE][FACE_VOMITING][FACE_VOMITING] امپرا…	0	0	3	0	3	irrelevant
اینهمه سوال میپرسن دوست دارید پارتنرتون اینطوری باشه یا اونطوری باشه؟ من فقط میخوام پارتنرم وجود داشته باشه	1	1	1	0	3	irrelevant
بستگی به قد پارتنر داره. قد بلندا قد بلند میخوان. قد کوتاها، کوتاه	0	1	2	0	3	irrelevant
مهریه رو اخرشو میدن نفقه خب داره برات کنیزی میکنه و بچه اتو نگهداری میکنه شیربها هم رسم مزخرفیه که به معنای فروش دختره و ما نداریم شما قانونو مطالعه کنی میبینی به عنوان شوهر خیلی دستت بازتره تا یه زن،فقط بخش مادیشو دیدی ولی بلاهایی که شوهر سرزن با استفاده ازقانون میاره رو ندیدی	0	1	1	0	3	relevant
دقیقتر میشه نوجوان همسری [EYES][FACE_WITH_TEARS_OF_JOY]	0	1	1	0	3	relevant
از دوست پسرم بگم ک 202 قدشه ؟ :))))	2	1	0	1	0	relevant
واقعا امشب رو دوست داشتم تو بغل یکی خودمو لوس کنم مچاله کنم بخوابم دوست-پارتنر-رفیق-خانواده-… هرکی که حتی ذره ای حس خوبی بهش دارم :(	1	1	1	0	3	irrelevant
سطح شعورش نشون داده تو به این چیزا فکر نکن هنوز طفلی شوهر میخوای چکارررر	0	1	1	0	3	irrelevant
یک عدد فارس هستم بین پنج شش نفر اذری! ایا می دونستید اذری همینجوری روی ادم لود نیست و لازمه یادتون بدن؟ پس شبیه کر و لال ها نگاهشون می کنم و هر از گاهی لبخند می زنم! ایشالا که درباره من حرف نمی زنن [GRINNING_FACE_WITH_SWEAT]	0	0	3	0	3	irrelevant
بیشعوری یعنی میبینی زنت از پادرد و کمردرد داره ناله میکنه و بهت میگه وسایلتو جمع کن که رختخواب پهن کنم، به جای کمک کردن بگی خودت بردار مگه این کاری داره؟! تازه طلبکارم باشی که چته خانم؟! خداوکیلی بیشعورتر از این مرد اگه کسی سراغ داره بهم بگه	2	1	1	1	1	relevant
یادمه سرباز مهندسی هنگ مرزی بودم ،ناظر پیمانکارای هنگ ،عقد بودم با همسرم 3ماه دنبال انتقالی بودم که برم شهرم خدمت کنم ،هر کاری کردم فرمانده هنگ موافقت نکرد از عالم و ادم واسش نامه اوردم قبول نکرد ،یه روز به عنوان کارشناس خواستن برم تو جلسه یه ساختمونی -	2	1	2	1	2	irrelevant
شیرزاد کراشمه پس هر کاری که انجام بده درسته نگار جواهریان لیاقت شوهر به این خوبیو نداره	0	1	1	0	3	relevant
تورم پنجاه درصدی مردت می کنه چه بخوای چه نخوای نمی خواد برای مرد شدن دنبال حمالی کادری بری سربازی اجباری ستاد کل بردگان از سربازی بگو	0	0	3	0	3	irrelevant
با احترام ریدم تو زنت :(	0	1	1	0	3	relevant
فوش گذاشتم رو هرکی کیسای 1401 رو بپرونه کصخل یارو که رفتی باش کافههههه یادته شوهر بوددد اون	0	0	3	0	3	irrelevant
[PENSIVE_FACE] زن سابق شوگا بودم الان زن جینم حذف کردم الان باید اسم شوهر الانمو بگم نه سابق	2	1	2	1	2	relevant
اخر سر زن تو خشگل شد یا ماله من؟	2	1	2	1	2	relevant
خوب شوهر بکن در کنارش جلق هم بزن	0	1	2	0	3	irrelevant
اخه ژوانا هم شد اسم تازه به دنیا اومد سوتی دادم ژوپیتر فکر کرد مسخرشون کردم مهمونی تلخ شد خانمم ناراحت شد چرا نوه عمه خانم را مسخریدم [SLIGHTLY_SMILING_FACE][SLIGHTLY_SMILING_FACE][SLIGHTLY_SMILING_FACE]	2	1	1	1	1	relevant
امروز خونه سه تا از خاله ها و یه دایی همسرم رفتیم عید دیدنی. خیلی دوستشون دارم و دوستم دارن. یه جوری بغلم میکنن و میبوسن و حس نزدیکی دارن انگار 20ساله عروسشونم. یاد روزهای اولی افتادم که دیدمشون و نمیفهمیدم چی صحبت میکنن. اما محبتشون از روز اول بیشتر شده که کمتر نشه [SMILING_FACE_WITH_HEART_EYES][SMILING_FACE_WITH_HEART_EYES][SMILING_FACE_WITH_HEART_EYES]	2	1	0	1	0	relevant
تو تبریز صبر و تحمل تو رانندگی صفر. ماشینی از پارک خارج میشه، من پشتش راهنما زدم که میخوام جاش پارک کنم. لاین کناری کاملاً باز و با تردد. پشتی من بوق و نور بالا پشت هم. دیگری، دور می زنم وارد مجتمع بشم ماشینی جلوی ورودیه، راننده اش بدوبدو اومد سوار شد اما روبرویی نور بالا و بوق.	0	0	3	0	3	irrelevant
ماهم از ایناییم گمونم [FACE_WITH_TEARS_OF_JOY][FACE_WITH_TEARS_OF_JOY][FACE_WITH_TEARS_OF_JOY][FACE_WITH_TEARS_OF_JOY] یه روز با شوهرم تو خیابون می رفتیم یه دختره رسید بهمون گفت ااااا ه ه ه ه چقدر زن و شوهر دیدم امروز حالم بهم میخوره دیگه از این زن و شوهرا[FACE_WITH_TEARS_OF_JOY]	2	1	2	1	2	relevant
ببخش که پیامتو ریپ میزنم چون برا من ننوشتیش ولی میخوام بهت بگم اگه واقعا نمیفهمن بهشون از یه جایی به بعد نگو قصد ازدواج نداریو فلان بلکه خواستگاراتو بپرون یه کاری کن طرف ازت خوشش نیاد نمیدونم جواب بده یا نه ولی اینم یه روشه اگه دیدی با این روش کمتر اذیتت کردن حتما انجامش بده	0	1	2	0	3	irrelevant
باید از همسرم بپرسم. ببخشید.	2	1	2	1	2	relevant
پارتنر که هیچی یه گربه حق من نیست ؟	1	1	1	0	3	irrelevant
اصن یه حالی ام ، انگار دلم شوهر میخواد [LOUDLY_CRYING_FACE]	1	1	2	0	3	irrelevant
اناهیتا درگاهی. میگفتم گوشی رو بده به اشکان خطیبی شوهرت، با تو کاری ندارم [WOOZY_FACE][SMIRKING_FACE][FACE_WITH_TEARS_OF_JOY]	0	1	2	0	3	relevant
اگه شوهرم/دوسپسرم نذاره دودول طلا صداش کنم چی؟	0	1	2	1	2	irrelevant
جالبه! کاترین شکدم میگه برای فرار از فشار شوهرم کارمندطور هر چی ایرانیا میخواستن براشون مینوشتم تا احساس امنیت و دلخوشی داشته باشم. خداییش طبقه روحانی رو خوب شناخته و توصیف کرده.:)	0	1	1	0	3	relevant
بابا یارو از شوهر 20 سالش طلاق میگیره میره زن یکی دیگه میشه سخت نگیر شل کن سخت بگیری زندگیت حروم میشه الانم بلاک کن باسنش سوزش بنماید یا هم نکن یه روز خودش بر گشت اهنگ اسیر فروهر رو یفرست	0	1	2	0	3	relevant
وقتی این بنده خدا مرد من کلاس ششم بودم الان من 19 سالمه این هنوز اهنگ میده [FACE_WITH_TEARS_OF_JOY][FACE_WITH_TEARS_OF_JOY][FACE_WITH_TEARS_OF_JOY]	0	0	3	0	3	irrelevant
اون لحظه که می خواستی این جملات رو ادا کنی، حتما خیلی برات سخت بوده؛ حدس می زنم دستات عرق کردن، ضربان قلبت رفته بالا، صورتت سرخ شده، صدات لرزون شده و به لکنت افتادی، نه؟	0	0	3	0	3	irrelevant
اره دقیقا منم خیلی همیشه برام سوال بود تو نوجوونی که چرا جمع خانوما درمورد زندگی و بچه و شوهر و ارایشگاه حرف میزنن و مردا همش جنگ و دعوا و سیاست حتی خودم هم از این بحثای اروم بیشتر خوشم میاد [FACE_WITH_TEARS_OF_JOY]	0	1	2	0	3	relevant
ن داش من زنم و گم نمیکنم	2	1	0	1	0	relevant
تو همسر ایندمی اصن گل پری جون listen to exo growl by exo	1	1	0	0	3	irrelevant
شماره شوهرم و از کجا اوردی	2	1	1	1	1	relevant
عرض کردم. همیشه استثنا هست. ولی اکثرا کسایی که رابطه رو تجربه نکردن تو تاهل به مشکل شدید میخورن. یا با همسرشون یا خودشون. یا دعوا و جدله. یا شخصیت توسری خوری پیدا میکنن. شاید بعضی مردا دوس داشته باشن زن حرف گوش کن. من نه ادم مستقل رو بهش احترام میذارم	0	1	1	0	3	relevant
سال نو تون مبارک باشه سال جدید با کوینکس هفت سین با کوینکس اینی که میبینید گیفت سال تحویله که سبزه و ماهی و همه چیز هفت سینو داره به همراه تخم مرغ هاش و ساختمش برای بچه های کوینکس ایشالله هرجا که هستن با ما سال رو نو بکنن. ممنونم از پارتنر های کوینکس	0	0	3	0	3	irrelevant
: درسته خوب قر میدین ولی فیس و افاده تون زیاده شوهر گیرتون نمیاد	0	1	2	0	3	irrelevant
چقدر با خودم حرف می زنم جدن. خودم از خودم سوال می پرسم اما خودم جوابی ندارم که به خودم بدم. :)	0	0	3	0	3	irrelevant
ها بخدا من به این کوچکی بعد فکر کن طرف خودش بیست سال پیش که ازدواج تو سن کم باب بوده بیست و هفت سالگی ازدواج کرده الان میخواد همه رو قبل بیست شوهر بده [ROLLING_ON_THE_FLOOR_LAUGHING]	1	1	1	0	1	relevant
به نظرم دوس پسر یا شوهر ایندش میتونه ادعای خدایی بکنه	0	1	0	0	3	relevant
متاسفانه باید بگم حقیقت محضه حتی ما تو گروهمون وقتی برای هر کدوممون خواستگار میاد از یارو عکس میگیریم میفرستم بهش میخندیم و ب همین ترتیب تا ابد بی شوهر میمونیم [FACE_WITH_TEARS_OF_JOY][FACE_WITH_TEARS_OF_JOY][FACE_WITH_TEARS_OF_JOY]	1	1	1	0	3	irrelevant
مقاله زنم اکسون شده من خوشحال تر از خودشم	2	1	0	1	0	relevant
1)نداشتن حق پوشش و تردد با ده لایه لباس تو گرم ترین تایم سال 2)نداشتن حق طلاق و حضانت و خروج از کشور،یعنی هر بلایی هم سرت بیاد شوهرت از تو بهتر میفهمه و فقط اون باید تصمیم گیری کنه راجب زندگی«مشترک» 3)بیرون رفتن برای هرکاری=شنیدن حداقل 10تا متلک جنسی و راجب بدنت	0	1	1	0	3	relevant
شوهر سدمعصومه، از بوی سرکه خوشش نمیاد [FACE_WITH_TEARS_OF_JOY][FACE_WITH_TEARS_OF_JOY]	0	1	2	0	3	relevant
شوهر میخوام ولی حوصله شوهر ندارم میفهمییییب؟؟؟؟	1	1	2	0	2	irrelevant
ملت ایران کند ذهن نیستن ممکنه قبلا درامدش خوب بوده و اینکه زندگی زن و شوهری بدون بچه واقعا نمیشه یکی میلیارد ها تومن پول خرج میکنه بچه دار بشه یکی یه ریال نداره صد تا بچه داره	0	1	1	0	3	relevant
هرکاری میشه کرد شیو کرد کاندوم اماده کرد مکانشو ردیف کرد پارتنر اوکی کردو…	0	1	2	0	3	relevant
زن من با زن کدومتون داره لاس میزنه	2	1	1	1	1	relevant
: اگه زنم کفش ال استار با شلوار لی دوس نداشته باشه چی!؟؟	1	1	1	0	3	irrelevant
مگه زنت پانیذه	0	1	2	0	3	relevant
کراش عزیزم میشه بشی شوهر عزیزم؟؟ [PENSIVE_FACE][RING]	1	1	2	0	3	irrelevant
واقعا زنده تر از پدرشوهرم بین اقوامِ امواتم ندارم…به طوری که امشب انگار دیدمش…انقدر همه جا هست و ور دلمه… حاج اقااااا [RED_HEART][RED_HEART][RED_HEART]	2	1	0	1	0	relevant
من عمه ندارم ، و نمیدونم چرا انقدر بد میگن ولی جالبش اینه بابای من ک شوهر عمس اصلا کاری نداره ، و اصلاش وخی مضخرف نیمکنه [NEUTRAL_FACE]	0	0	3	0	3	irrelevant
خالم اینا داشتن میرفتن از خونمون گفتن خونه ما بیاید شوهر خالم اومد یواشکی در گوشم گفت با دوستت (پارتنرم) بیا :)))))	2	1	2	1	2	relevant
باید یه مسواک، یه رژ لب و یه کرم بدم به دوست پسرم که همیشه دنبالش باشه. برای من. چون هر دفعه میریم بیرون یکیشون رو یادم میره	2	1	2	1	2	relevant
دوست دختر من شب غلط میزنه توبغلم میخوابه ولی صب بابوس من ازخواب بیدارمیشه که پاشو صبونه حاضر کردم بخوریم منتها اول باید بیابمش	1	1	0	0	3	irrelevant
روایت نور روایت جهاد از سویی دیگر، همسر او هم که از سالکان طریق دین بود، در این زمینه با هم عقیده بود؛ بنابراین ان ها تصمیم گرفتند تا برای مبارزه با سلطه ضدانقلاب به پا خیزند. بعد از پیروزی انقلاب اسلامی و حضور عناصر ضدانقلاب در منطقه، «فاطمه اسدی» برافروخته شد	0	1	2	0	3	relevant
یه دوست دارم که تازه دوست شدیم گفت من میرم جایی تو بهم زنگ بزن باهم حرف بزنیم اونجا نت نداره و اینا مشکل اینجاست که من فکر میکنم مزاحمم و زنگ نمی زنم اون چرا زنگ نمیزنه :))	0	0	3	0	3	irrelevant
زنم تی گوش کُنا	2	1	2	1	2	relevant
اولا اگه دوستتون شوهرش تمام ارتباطات و قطع کرده پس شما از کجا تمام ماجرا رو متوجه شدید ، دوم: جای کسی نباشی نمیتونی قضاوت کنی که علت چی بوده ، سوم: ادم خوب نیست تو مسایل خصوصی کسی دخالت کنه و بدتر اون مسایل رو تو بوق و کرنا کنه و همه جا جار بزنه ، چهارم: غیبت کار خوبی نیست خانم	0	1	1	0	3	relevant
عذر میخوام این کلا جنده ایه که شوهر کرده	0	1	1	0	3	relevant
نه از اونا خوشم میاد، نه لباس دارم بپوشم، نه مسافرت ی هفته ای تو عید به درد میخوره، نه از شوهرم خوشم میاد، پاشم برم کدوم قبرستون اخه	2	1	1	1	1	relevant
دلم برای زنم خیلی تنگ شده	2	1	0	1	0	relevant
: تشبیه من از دوست دخترم: همزمان کیوت و عصبی	2	1	0	1	0	relevant
من نمیگم بد بودی، نمیگم زیبا نبودی، نمیگم لایق عشق من نبودی، کل حرفای چرتی که اکثرا پشت سر طرف میزنن رو نمیزنم حتی بعید میدونم دیگه کسی رو پیدا کنم که اینقد دوست داشتنی باشه و به دلم بشینه ولی خب بقول اون اهنگه؛ نه اینکه تو عشقت من کم اوردم، مشکل فقط همین بود دوستم نداشتی :)	2	1	1	1	1	relevant
اول که غیر ممکن هست فرض محال که شد شکرگذار که از پارتنر خود حامله هستم نه از پارتنر دیگران ، که اون دیگه خیلی سخته	2	1	0	1	0	relevant
شوهر کن مجانی این کارارو انجام میده تازه پولم بهت میده [FACE_WITH_TEARS_OF_JOY]	0	1	0	0	3	irrelevant
با هر نگاه بر اسمان این خاک هزار بوسه میزنم نفسم را از رود سپید و اسمان خزر و خلیج همیشگی فارس میگیرم من نگاهم از تنب کوچک و بزرگ و ابوموسی نور میگیرد من عشقم را در کوه گواتر در سرخس و خرمشهر به زبان مادری فریاد خواهم زد من خورشید هزار پاره ی عشق را بر خاک وطن می اویزم [VICTORY_HAND][ROSE][VICTORY_HAND]	0	0	3	0	3	irrelevant
همینجوری رفاقت میکنید که شوهرم رفیق و دوست اجتماعی پسر برام ممنوع کرده	2	1	1	1	1	relevant
زنگ زدم پدرم و سال جدید رو بهش تبریک گفتم گفتم گوشی رو بده مامان گفت : کسی نیست منم و اقای خامنه ای و اقای رییسی گفتم په مامان کجاست؟ گفت رفته شهرستان گفتم تحویل بگیر ، هی میگفتی برو زن بگیر بهترین لحظه سال خانمت ولت کرده رفته به فامیلش سر بزنه :) عید نوروز مبارک	0	1	2	0	3	irrelevant
دیگه وقتش بود با شوهرم اشنا شین [PINCHED_FINGERS_LIGHT_SKIN_TONE][RELIEVED_FACE]	2	1	2	1	2	relevant
تمام دلایل رو امیر گفت، یه پروژه nft باید community فعالی داشته باشه صرفا بگه dao که دلیل به خوب بودن نمیشه. پارتنر هایی که با پروژه همکاری میکنه مهم است. پروژه های nft روی باید ببینی جامعه lunatic واقعا حمایت میکنن یا نه باید به نقشه راه پروژه دقت بشه.	0	0	3	0	3	irrelevant
اقا یه سوال از باتجربه هاا در رشته انسانی چه شغلی به نظرتون بازار کار بهتری داره ؟ دارم گیج میزنم [SMILING_FACE_WITH_TEAR]	0	0	3	0	3	irrelevant
البته اگه پولدار هم نبود باز می تونست پنج بار شوهر کنه	0	0	3	0	3	irrelevant
بنده خدا اون از خودش مطمینه احتمالا عقیمی چیزیه [FACE_WITH_TEARS_OF_JOY][FACE_WITH_TEARS_OF_JOY][FACE_WITH_TEARS_OF_JOY] برای اینکه پارتنر شیرینی داره تو کونش عروسیه مگر اینکه طرف شوهرت باشه[FACE_WITH_TEARS_OF_JOY]	0	1	0	0	3	relevant
نمیشه با شوهرت صحبت کنی که کنسل کنه؟	0	0	3	0	3	irrelevant
ی شوهر خیلی پولدار و پیر ک زود بمیره من با زیدم پولاشو خرج کنیم [KITCHEN_KNIFE]	1	1	2	0	3	irrelevant
اره ولی یه ماهه از کجا شوهر پیدا کنم [FACE_WITH_TEARS_OF_JOY][FACE_WITH_TEARS_OF_JOY][FACE_WITH_TEARS_OF_JOY]	1	1	2	0	3	irrelevant
خدا هم قطعا کمکتون می کنه. اگر تنهاتون بگذاره که نقض غرض کرده. شما خیلی جلوتر از اون کسی هستید که میدونه طرف مقابل شوهر داره و بازم باهاش وارد رابطه میشه و زندگی یک زن رو خراب میکنه. جای شکر داره واقعا.	0	1	1	0	3	relevant
من انگشترمو انتخاب کردم فقط موند شوهر.	1	1	2	0	3	irrelevant
مرد از تمامِ قیچی ها متنفر بود وقتی که یک عصر با موهایِ کوتاه شده همسرش روبرو شد ! زن اما از تمامِ موهایِ بلوندِ بلند متنقر است ! از ان روزی که… یک تارِ مویِ لَخت ، رویِ تخت پیدا کرده… در حالی که از کودکی موهایِ فرِ قهوه ای داشت…	0	1	1	0	3	relevant
ایشون زن من هستن چون خودم اول گفتم لطفا مزاحمت ایجاد نکنید [FOLDED_HANDS_MEDIUM_LIGHT_SKIN_TONE]	2	1	2	1	2	relevant
مجری از خانومه پرسید عید امسال چه فرقی داره برات که خونه خودت کنار همسرتی ؟ خانومه گفت :هیچی ، حس میکنم یه نفر اضافه شده [FACE_WITH_TEARS_OF_JOY] نکنه یه وقت ازدواج کنیم و یه همچین حسی داشته باشیم[UPSIDE_DOWN_FACE][UPSIDE_DOWN_FACE][UPSIDE_DOWN_FACE]	2	1	1	0	3	relevant
بزارازچیزایی که دیدم بگم دختر عمم11سالش بود ازدواج کرد16سالگیش طلاق گرفت چرا؟چون شوهرش چوپان بودوقتی ازدواج کرد راضی بودایهو فهمیدچه غلطی کرده دختر دوست مامانم کلاس شیشم بود ازدواج کردو اونم 16سالگی طلاق گرفت چرا؟چون شوهرش براش خوراکی نمیخریدوپابه پای خیالات نوجوانانش راه نمیومد.	0	1	1	0	3	relevant
والا کرم نیوا خیلی کلاسش بالاست [FACE_WITH_TEARS_OF_JOY] خودتو با ما نگیر وگرنه میگم وازلین هم می زنم [FACE_WITH_TEARS_OF_JOY]	0	0	3	0	3	irrelevant
دوست دخترم بهم گفته من اینجوری نیستم منه ساده ی زود باور [LOUDLY_CRYING_FACE]	2	1	1	1	1	relevant
من پارتنر میخوام پدرسگ	1	1	1	0	3	irrelevant
یعنی الان تو خیابون راه بری با زنت یکی بیاد بگه زنتو من چند بار کردم بهش میگی مرسی که نیاز جنسی زنمو برطرف کردی؟ یا بخاطر اموزش صحیح سکس به زنت ازش تشکر میکنی؟ [FACE_WITH_TEARS_OF_JOY]	0	0	3	0	3	irrelevant
برمیدارن به چیزا اسم شیک میدن مردم رو خر میکنن . این پسره کینگ رام راه افتاده پلی امری پلی امری. اخه شتر چه فرقی با اون پاکستانیه داری که 7 تا زن میره میگیره، فقط اسماتون فرق داره. البته از حق نگذریم یه فرق مهم داره که برای پارتنر زنش هم همچین حقی رو قایله طرف در پلی امری .	0	1	1	0	3	relevant
من مشهد بودم و به نیابت از همسر مرحوم شما زیارتنامه ی مختصر حضرت رضا رو خوندم…انشاالله باعث ارامش روح ایشون و قلب شما بشه. [RED_HEART][RED_HEART][RED_HEART]	0	0	3	0	3	irrelevant
اگه دوست دخترم بودی الان برات کلی خوراکی خوشمزه میاوردم.	1	1	1	0	3	irrelevant
اگه شوهر نکنم امسال چی؟ واقعا نمیترسین؟	1	1	1	0	3	irrelevant
سلام. عیدت مبارک. پرهامم 37 ساله از تهران. دارای فانتزی های اروتیک زیادی هستم. به دنبال یک سکس پارتنر هستم. با یک عیدانه 5 مییلیون تومانی. مایل هستی با هم تجربه داشته باشیم؟	1	0	3	0	3	irrelevant
حرفت رو قبول دارم واقعا چراا خونه ما هم به من میگن بریم دختر فلانی رو بگیریم میگم من اونو نمیشناسم هیچجوره چطور برم بگم بیا زنم شو اردواج سنتی واقعا زور داره تو کته من نمیره	1	1	1	0	3	irrelevant
منم شوهر دارم همون بچت شدن خوبه exo	2	1	2	1	2	relevant
این عید تا الان اینطور بوده که فامیلامون علاقه دارن و منتظرن که من شوهر کنم. غم انگیز.	1	1	1	0	3	irrelevant
الان فهمیدم ارزوم برای سال جدید چیه یه پارتنر که 24/7 ماساژم بده [GRINNING_FACE_WITH_BIG_EYES][GRINNING_FACE_WITH_BIG_EYES][GRINNING_FACE_WITH_BIG_EYES][GRINNING_FACE_WITH_BIG_EYES][PRAYER_BEADS][PRAYER_BEADS][PRAYER_BEADS][PRAYER_BEADS][PRAYER_BEADS][PALMS_UP_TOGETHER][PALMS_UP_TOGETHER][PALMS_UP_TOGETHER][PALMS_UP_TOGETHER][PALMS_UP_TOGETHER]	1	1	0	0	3	irrelevant
این اهنگش رو گوش بدید لطفا. خانمم مثل شما متنفره از ابی ولی این یه دونه اهنگ براش فرق داره	2	1	2	1	2	relevant
به نظرتون چیکار کنم بلا حدید زنم شه	1	0	3	0	3	irrelevant
: اقا یه سوال از باتجربه هاا در رشته انسانی چه شغلی به نظرتون بازار کار بهتری داره ؟ دارم گیج میزنم [SMILING_FACE_WITH_TEAR]	0	0	3	0	3	irrelevant
واسه من همش هی پست میاد مادر شوهر پاچه عروسشو گرفته [ROLLING_ON_THE_FLOOR_LAUGHING]	2	1	2	0	3	relevant
دوست دختر من موهاش بلونده اخلاقش ولی یکم تنده [WINKING_FACE]	2	1	1	1	1	relevant
من فقط یکیو میخوام که تو بغلش گریه کنم و غر بزنم و اون هیچی نگه و موهامو ناز کنه- ترجیحا دوست دخترم باشه خواسته زیادیه؟	1	1	1	0	3	irrelevant
نه اجازه ندارن. حتی اگر دوبار شوهر کرده باشند در دنیا بعدا باید یکیشو انتخاب کنند [ROLLING_ON_THE_FLOOR_LAUGHING]	0	0	3	0	3	irrelevant
وای چقد خوب بود این [FACE_WITH_TEARS_OF_JOY] شوهر خارجی میخوام بهش فارسی یاد بدم	1	1	0	0	3	irrelevant
چند سال پیش ماه عسل یه خانومه رو نشون داد شوهرش تصادف کرده بود بهش میگن ممکنه پای شوهرت قطع بشه. خانومه ایست قلبی کرده بود از ناراحتی. به مرده گفتن شنیدی زنت ایست قلبی کرده چیکار کردی مرده گفت خب ناراحت شدم.علیخانی بهش گفت لامصب این به خاطر پای تو قلبش واستاد! تو میگی ناراحت شدم!	0	1	1	0	3	relevant
همسر من موقع رانندگی فوبیای اتوبوس و ماشینای گنده داره! دایمم میگه مواظب باش!	2	1	1	1	1	relevant
دوستان با شوهرتون میشینین مشروب میخورین نوش جونتون ولی لازم نیست استوریش کنین:))))	0	1	1	0	3	relevant
اینکه ما بخوایم رفتار کسی چنین نباشه، بلکه طور دیگه ای باشه، یک مسیله فنی هست. یک راه حل این مسیله فنی صحبت با پارتنر هست که واسه یک رابطه صمیمی لازمه. اما یک مسیله فنی راه های حل زیاد و مکمل هم داره. ربط تکامل به قضیه چیه؟/3	0	1	2	0	3	relevant
نمیدونم چقدر در جریانید، اما من شدیدا به شوهر نیاز دارم.	1	1	1	0	3	irrelevant
همسر من متخصص پرده خوانی و اجراگری (پرفرمنس) سنتی ایرانی است و الان عاشق این پرده شده… جزییاتش و مقدار پروپاگاندای مسخره درش، بی نظیره!	2	1	2	1	2	relevant
مهوش پریوش چه بد کرد شوهر کرد همه را در به در کرد	0	0	3	0	3	irrelevant
بنظرم اگه قراره زن دستشویی نره، زنم میتونه این حق داشته باشه که همسرش دستشویی نداره.	0	1	1	0	3	relevant
اصن کدوم دختری شوهر میکنه الان دیگه	1	1	1	0	3	irrelevant
بلکه کارامدی شون طی خود تکامل ثابت شده. مکانیسم هایی مثل همرنگ جماعت شدن، گستاخی…؛ اینکه به این مکانیسم ها بگیم نابالغانه یا ناسالم، دلیلی می خواد که ارایه ندادید. چون وقتی هدف اخلاق رسیدن به وضع مطلوب باشه، این ها می تونن کاملا کارامد باشن؛ در کنار گفت و گو با پارتنر/5	0	1	2	0	3	relevant
دیشب اینهمه افسانه گفتید بزارید منم بگم(: یه افسانه قدیمی هست میگه هرکی دماغ داره زن منه	1	0	3	0	3	irrelevant
خانمم خیلی دوس داره طلافروشی بزنیم ازین تکه های ریز و سبک کادویی که خریدش برای مردم راحت تر هم باشه سرمایه اولیه کمتری هم بخاد ممنونم میشوم اطلاعاتتون بشنوم دستتون درد نکنه	2	1	2	1	2	relevant
به اینکه بخوای بری عید دیدنیه کل فامیلای زنت [FACE_WITH_TEARS_OF_JOY]	0	1	1	1	1	relevant
رفاقت رو رفاقت نگه دار رفاقت واقعی میتونه خیلی طولانی تر باشه متاسفانه پارتنر بعد چن وقت میره ولی رفاقت میتونه تا خییییییییلی وقت بمونه	0	1	1	0	3	relevant
اقا بیاین بگین من با اینکه دیابت دارم میتونم تتو بزنم ولی [SMILING_FACE_WITH_TEAR] بیاین بگین میتونمممم	0	0	3	0	3	irrelevant
دوست پسر من اینجا چیکار میکنههه	2	1	2	1	2	relevant
3 حالا ایا بی نیازیم از اینکه جز پارتنر، بخوایم رو بقیه هم تاثیر بذاریم؟ صد در صد نه. شما گفتید که اگه کسی نخواد تنش رابطه اش رو کم کنه، مشکل داره و باید خودش رو درست کنه. البته که این حرفتون غلطه. می تونه پارتنرشو عوض کنه. چرا مشکل؟ یا/6	0	1	2	0	3	relevant
: من دوس دارم شوهرم راضی بشه دوستاموبیارم خونه وباهم باشیم سه تایی… [SMILING_FACE_WITH_HEARTS][SMILING_FACE]	2	1	2	1	2	relevant
شاید باورتون نشه ولی هنوز یه سریا با سال نوت مبارک دارن سر بحثو وا میکنن مرد چرا نمیفهمی نمیخوام باهات حرف بزنم	1	0	3	0	3	irrelevant
ببر بچه خالتو بزار سر جاش تا شوهر خالت یکی دیگه نساخته [PENSIVE_FACE][MAN_WALKING_LIGHT_SKIN_TONE][FACE_WITH_TEARS_OF_JOY]	0	0	3	0	3	irrelevant
دل منم شوهر میخواد با این وض	1	0	3	0	3	irrelevant
اومدم بگم شوهر خالم خیلی گاوه، ترسیدم گاو اون دنیا یقه م رو بگیره.	0	0	3	0	3	irrelevant
دیگه توییت (تولدم مبارک نمیزنم) میترسم روز تولدم فک کنید دروغ میگم [FACE_WITH_TEARS_OF_JOY][FACE_WITH_TEARS_OF_JOY] 14 بهمن تولدمه اقااااااا	0	0	3	0	3	irrelevant
شاید پارتنرم البته دقایق اخر	2	1	2	1	2	relevant
ارررره چون بوی فرند نیسسسس لامصب همسره همسرررر [PERSON_WITH_VEIL_LIGHT_SKIN_TONE]	2	1	0	1	0	relevant
چرا بعضی ها انگار فتیش پارتنر دارن اگه یه روز سینگل بمونن کهیر میزنن؟	0	1	1	0	3	relevant
در حالی که غصه می خوردم به مامانم گفتم من می دونم اخرش نه شوهر می کنم نه بچه دار می شم، پیر ام که شدم کسی رو ندارم مراقبم باشه می ذارنم خانهٔ سالمندان، اونجا تو تنهایی میمیرم [SMILING_FACE_WITH_TEAR] مامان فرمودن نترس خانهٔ سالمندان تنها نیستی کلی مثه خودت هستن اونجا[SMIRKING_FACE] مرسی مامان از روحیه ای که دادی[WOMAN_WALKING_LIGHT_SKIN_TONE]	1	1	1	0	3	irrelevant
در صورت مشارکت مالی طرف مقابل بلامانعه اما ادعای حقوق بیشتر بر مبنای انجام نقش و وظایف یک خانم در منزل و نادیده گرفتن زحمات همسر بنظرم عادلانه نیست.	0	1	1	0	3	relevant
چرا مامان من اینقدر دوس داره من ازدواج کنم ؟ دیونه شدم اشتیاقشو برای ازدواجم میبینم دوس دارم کلمو بزنم ب دیوار	1	1	1	0	3	irrelevant
شب نشینی بهش میگن… با کسایی که دوسشون داری عجیب حال میده… من و همسرم با دوتا از دوستامون 11 دورهم جمع شدیم و به خودمون اومدیم دیدیم ساعت 4 صبحه ! و اینقدر خوش گذشته بود متوجه گذر زمان نشدیم	2	1	2	1	2	relevant
نمی تونین به زنی بگین اصلا ازدواج نکن اگه شوهر غیرلاسو یا مناسبت رو پیدا نکردی. اگه افراد می تونن با روش های کمتر تمیز مثل فشار اجتماعی به نیازشون برسن، چرا این کار رو نکنن؟/9	0	1	1	0	3	relevant
گنجشکک های بی نامو نشون کیا زدنت بزنم جملشونو اقیانوسم مرد کشتی کجایی ی یارو بود میگفتن پهلوونه پرت میکرد برمیگشت هربار و…همش از ذهنم گذشت	0	0	3	0	3	irrelevant
من هم جنبنده ای هستم از جنبندگان شما روی زمین. در جای دیگر از قران فرموده اید : "ان الله لا یخلف المیعاد" مسلما خدا خلف وعده نمیکند. بنابراین اینجانب به چیزهای زیر نیاز دارم : [MAPLE_LEAF]همسری زیبا و متدین [FOUR_LEAF_CLOVER]خانه ای وسیع [BOUQUET]یک خادم [DECIDUOUS_TREE]یک کالسکه و سورچی [PALM_TREE]یک باغ [HIBISCUS] مقداری پول برای تجارت 3)	0	1	0	0	3	irrelevant
تواین یه مورد واقعا تک همسری امکان نداره چندهمسری کباب برگ چنجه شیشلیک ماهیچه پیتزا برگر سوخاری… باهمشون	0	1	0	0	3	relevant
به قران که عذاب جهنمه [FACE_WITH_TEARS_OF_JOY][WOMAN_FACEPALMING_LIGHT_SKIN_TONE] مادررررر شوهررررر[EXPLODING_HEAD][FACE_WITH_TEARS_OF_JOY]	2	1	1	1	1	relevant
ننه تو و زنت چرا انقدر قشنگ و مهربونین [FACE_HOLDING_BACK_TEARS][FACE_HOLDING_BACK_TEARS][FACE_HOLDING_BACK_TEARS]	0	1	0	0	3	relevant
نه به کودک همسری	0	1	1	0	3	relevant
این تبریه و محکوم شدن ها بهونه خوبی شده یه فضای استادیومی بدون تفکر درست کنن و یه سری کاربر هم بدون فکر دنبال خط های بالا بدون. یه بار میگن رامین شوهر مهناز افشار تبریه شد خاک بر سر قاضی فاسد. یه بار میگن قالیباف تبریه شد احسنت به قاضی. حالا هم دهباشی تبریه شده. چی میگن؟	0	0	3	0	3	irrelevant
اگه تو نذاری شوهرت/دوسپسرت کص چروکیده صدات کنه چی؟	0	0	3	0	3	irrelevant
پارتنر خوب و پیدا نمیکنن ، میسازن	0	1	0	0	3	relevant
خالم سالها بچه دار نمیشه ضعیفه شوهر نفهمش وقتی حامله بود میبرتش کرمان و اونجا بچش میفته [WOMAN_FACEPALMING_LIGHT_SKIN_TONE]	0	1	1	0	3	relevant
یعنی یک شوهر خارج نشین پیدا نمیشه منو ببره [SMILING_FACE_WITH_TEAR]	1	1	1	0	3	irrelevant
اووووففففف عجب کسیه مادر شوهرت [SMILING_FACE_WITH_HEART_EYES] از خودت کس تره [WINKING_FACE]	0	1	2	0	3	relevant
شوهرم میخواد بچه بزاد؟؟	2	1	1	1	1	relevant
برای هزاران انسان بیگناه و وطن پرست حکم اعدام صادر کرد، میلونها دلار دزدی کرد و دختر 9 ساله را به همسری گرفت و بدون هیچ مجازاتی مرد. در اخر لقب عالم مجاهد هم بهش دادند! عدالت الهی را هم دیدیم!	0	0	3	0	3	irrelevant
جون مادراتون اینو دیگه سوژه نکنید جهانب بشه زنم بفهمه کونم پاره اس	2	1	1	1	1	relevant
من واقعا بی حوصله ام، ماکسیمم در روز به 3 تا سوال ادما می تونم جواب قابل قبول بدم بقیه سوالا رو با هر جوابی که میدم تو ذهنم بهتون مشت و لگد می زنم	0	0	3	0	3	irrelevant
حاجی تو این زمونه اخرش یا تهش اینه تو به زنت هرروز خواهی داد	0	1	1	0	3	relevant
والا منم بلدم برقصم. ولی فقط برای شوهرم ک ذوقمو بکنه نه واسه شما ها ک عیب بذارید روم.	2	1	0	1	0	relevant
از لحاظ روحی اینکه زنم می خوابید روی کمرم و صدای نفساش رو میشندیم، حالمو خوب میکرد.	2	1	0	1	0	relevant
مگه دخترو زود شوهر نمیدن زود زنم دادن چ صیغه اییه ؟ جدید بود	1	1	1	0	3	relevant
برجسته ترین دستاورد سال گذشته م هم این بود که در مهمونی بهتر از پارتنرم رقصیدم.	2	1	2	1	2	relevant
انگار اینجوریه که میرم مسافرت رل میزنم با همونم ازدواج میکنم خیلی عالی و مختصر	1	1	0	0	3	relevant
اینکه من خیلی وقتا بی دلیل ناراحت میشم اثرات اون روزاییه که گفتم ناراحت نشدم و خیلی عادی رفتار کردم . وگرنه دوستا و پارتنر الانم چه گناهی کردن که بخوان تقاص لاشیایی که دورم بودنو پس بدن. « تو سال جدید توی انتخاب روابطتون شدیدا دقت کنید . رابطه ها و دوستی های الانتون ،اینده تونن »	2	1	2	1	2	relevant
شما اگر خودت رابطه داشتی ببند دهنتو،اگر نداشتی میتونی از پارتنر اینده ات توقع داشته باشی	0	1	2	0	3	relevant
دلم برای اون زمانی که تو تی ال همه زنم بودن و باهمه لاس میزدم تنگ شده	1	1	0	0	3	relevant
اهنگ مهربون من همه جون من فدای احساس قشنگت از فلاکت رو 1 ماه بعد از انتشار به اس ام اس تبدیل کردم و برای دوست دخترم تو همون سالها فرستادم، فکر کنم 13 با 14 سال گذشته	1	1	0	1	0	relevant
اخ اخ گفتی یکی هست داستان جداشدنش از شوهر ظالمشو تعریف میکنه قنشگ رمان ایرانیه هر زنی که شوهره باهاش میره عفریتس این زن خوبس از یه طرف میناله که شوهره هیچ حمایت مالی نمیکنه خودشم کار نمیکنه اما شهریه مدرسه بچش 35 میلیونه [FACE_WITH_TEARS_OF_JOY][FACE_WITH_TEARS_OF_JOY]	0	1	1	0	3	relevant
بدیهی و بنظرم خیلی سخت تر از کار مرد تو بیرون میتونه باشه [CLAPPING_HANDS]	0	0	3	0	3	irrelevant
فامیلمون یه ایفون 13 استوری کرده با عنوان "عیدی همسر عزیزم" عمم ریپلای کرده "خب به سلامتی از امروز شاهد عکسات تو هر اینه ای که اطرافت میبینی هستیم" باز شدم :))))))))))	0	1	0	0	3	relevant
این ضرب المثل کل زندگی منه : همسایه ها یاری کنید تا من شوهر داری کنم	2	1	2	0	3	relevant
این چه سنت تخمیه که هر کی رو میبینین میگین زن نگرفتی/شوهر نکردی؟ یا به مامان بابای ادم میگین نوه دار نشدی؟ به تو چه؟ تو که گرفتی و کردی و زاییدی کجای دنیا رو گرفتی؟	0	0	3	0	3	irrelevant
هر چی فک میکنم فقط پارتنر ایندم میتونه باعث نسبت بشه [PENSIVE_FACE][FACE_WITH_TEARS_OF_JOY]	1	1	2	0	3	irrelevant
تولد اقامون نزار قبانیهه اینجا خطاب به همسرش میگه : بلقیس لا تتغیبی عنی فان الشمس بعدک لا تضی علی السواحل . . بلقیس خود را از من مگیر که پس از تو دیگر خورشید سواحل را روشن نمی کند.	0	1	0	0	3	relevant
زن باشی توایران امکان نداره خاسته نشی؟ جنس برتر بودن؟تاحالا تو خیابون بهت دست زدن،متلک جنسی انداختن ک هیچ گهی نتونی بخوری که ببینی جنس برتر بودن ینی چی؟ تاحالا پشت فرمون بودی بهت گفتن برو پشت ماشبن ظرفشویی بشین؟ شوهرت یا پدرت کتکت زده ک زنگ بزنی پلیس بگن خانوادگیه دخالت نمیکنیم؟	0	1	1	0	3	relevant
چون زن منه	2	1	2	1	2	relevant
[PENSIVE_FACE][FACE_WITH_TEARS_OF_JOY] ینی واقعا هیچ ممدی ندارید شایدم بچت یا شوهرت	0	1	2	0	3	relevant
و لی زن تو الان داری به جامعه همجنسگرایان توهین میکنی الان زنگ میزنم به صد و ده	0	0	3	0	3	irrelevant
عمه م یه بار دیروز پشت تلفن التماس کرد که امسال دیگه عروس شم، یه بارم امروز که رفتیم خونه شون. اینا فک میکنن من دنبال گوز خاصی به عنوان همسر اینده م، نمیدونن که شوهر نیست :))	1	1	1	0	3	irrelevant
اصغر همت (مروان در سریال امام علی) و همسرش افسر اسدی را اورده بودند به تلویزیون. از همت جاهای دیدنی شهرش شیراز را پرسیدند و چند مورد را گفت. از خانم هم در مورد زادگاهش پرسیدند؛ که با حقارت انباشته شده سال ها گفت: «ما در تبریز چیزی نداریم!» اسیمیلاسیون قوجامان تبریز خاموش کن	0	1	2	0	3	irrelevant
تو رابطه نقش جاسوس رو بازی نکنید،پارتنر باشید.	0	1	1	0	3	relevant
[FACE_WITH_TEARS_OF_JOY][FACE_WITH_TEARS_OF_JOY][FACE_WITH_TEARS_OF_JOY] تو همه اینایی ک گفتی هستی ،باید تورو ب همسری برگزینم خیلی غیرتی مثل اینکه	1	1	0	0	3	irrelevant
بابا من زمان شاشو بودن اینو یادمه حالا شوهر کرده [BROKEN_HEART] منم شوهر میخوام[BROKEN_HEART] شوهرم زن باشه لطفا[BROKEN_HEART]	1	1	1	0	3	irrelevant
فعلا برو یه شوهر پیدا کن که من سال دیگه رو حداقل از دست ندم [CONFUSED_FACE] بعد درباره اینا صحبت میکنیم	0	1	1	0	3	irrelevant
زنگ بزن من واسه پلیسا ترن انم عزیزم	1	1	0	0	3	irrelevant
سقوز بر روی تو دبلیو دو جهان مبارزه برای راهم ماشین تحریر شیکاگو مهتاب نقاشی شده با ابر دو دو سل سل لالا سل زیبای حقیقی شوهر صد روزه من سلام اقای گو=چینی	0	0	3	0	3	irrelevant
چندش تر از کودک همسری ندیدم	0	1	1	0	3	relevant
خودم تو همین مهدتمدن خرج خونه رو میدادم، فحش میشنیدم، کلی پول میدادم که پرستار بچه مو نگه داره که برم سر کار. ماجرا این بود که جناب میخواست بشینم خونه. سر همینا کلی شانس پیشرفت رو از دست دادم. تو ایران چنین شرایطی برا خانما نیست و همه چی بسته به وجدان همسره که با انصاف باشه یا نه	2	1	1	1	1	relevant
البته یه مشکل دیگه هم دارم. اینکه من با پارتنر بهتر میرقصم و باهاش سینک میشم. تنهایی جلوی دوربین یکم برام ویرده.	2	1	0	1	0	relevant
دیگه رفاقت و پارتنر و رابطه و تعهد نمیشه از هم تشخیص داد =/	0	1	1	0	3	irrelevant
من زن نمیخام شوهر میقام شوهر که اونم از 01/01/01 گذشتیم کنکله ؛	1	1	2	0	3	irrelevant
دوست دخترم گفت میخوابم بعد گفتم شب بخیر ده دقیقه بعد پیام داده حس میکنم با یک دختر دیگه داری حرف میزنی اونوقت من داشتم یه مقاله از سارتر در مورد اگزیستانسیالیسم می خوندم بارالها کاری کن که سرنجام کار تو خشنود باشی و مارستگار	2	1	1	1	1	relevant
تمام کثافت و رذالت نوعی از بودن غیر انسانی که امین حیایی نماینده ی ان است، در همان جمله ی به خیال خودش زرنگیش پیدا است؛ همان جا که گفت با ژاله صامتی نقش زن و شوهر صیغه ای را بازی کرده ایم. چاه توالت توی اون جمجمه ی کثافتت.	0	1	1	0	3	relevant
کجای دنیا دیدید مردی زنش رو ول کنه و از کشورش خارج شه. تقی سال 90 از ایران فرار کرد بدون اینکه زنش براش اهمیت داشته باشه اگاهانه زنش رو فرستاد زیر بسیجی ها تا الان بسیجی ها هفتاد هزار باز نرگس رو کردن, تقی هم میدونه اینو. بعد تقی از فرانسه فاز گرفته که زنش تو فشاره زنت فاحشه شده	0	1	1	0	3	relevant
من رقصمو فقط گذاشتم همسر ایندم ببینه حالا یه عده کلوز فرندمم هستن فامیلا هم که تو عروسی می بینن دوستامم تو جشنا می بینن دیگه بجز اینا فقط اقاییم می بینه قول قول [FACE_WITH_HAND_OVER_MOUTH][FACE_WITH_HAND_OVER_MOUTH]	1	1	0	0	3	irrelevant
: 90 درصد انگیزه من برای شوهر کردن اینه که یکی باشه که جاهایی از پشتمو که دستم نمیرسه رو بخارونه	1	1	0	0	3	irrelevant
ببین شوهر نه ولی شوهر خوب، که نیست [FACE_WITH_TEARS_OF_JOY]	1	1	1	0	3	irrelevant
: زن و شوهر چرا باید استوری بذارن همو تگ کنن عید نوروز رو بهم تبریک بگن مگه باهم زندگی نمیکنن مگه پیش هم نیستن این دیگه چه صی…	0	1	1	0	3	relevant
چرا دوس نداری شوهر کنی؟	0	1	1	0	3	irrelevant
اون از ابی اینم از ایرج طهماسب با مهمونی اینا چرا سر پیری کسخل شدن؟ اقای طهماسب کودک همسری سفارش سپاه رو چند حساب کردی؟	0	1	1	0	3	relevant
پارتنرم بودی حرفت باحال بود [FACE_WITH_TEARS_OF_JOY][FACE_WITH_TEARS_OF_JOY][FACE_WITH_TEARS_OF_JOY] ولی خوو نیستی و میگم از کجا میدونی خوشمزه هست نکنه…	1	1	0	0	3	irrelevant
منشن منو نشونش بده بگو این دختره هیجده سال داشت شوهر کرد چهل کیلو هم بیشتر نبود بلافاصله بعد عروسی باردار شد الان یه بچه پنج ساله داره تو بیل زنی برو باغچه خودتو بیل بزن! ملت چقد بیکارن! ادم زرنگ باشه واسه زندگی خودش تدبیر میکنه حتما این از زندگی خودش ناامید شده [UPSIDE_DOWN_FACE]	2	1	0	1	0	relevant
من موندم چرا دخترا دارن ویدیوی رقصو ب ازدواج ربط میدن میگن حتی مام زن میخوام از هر سوژه ای برای شوهریابی داره سواستفاده میشع	0	0	3	0	3	irrelevant
شوهر خالم گفت منو فالو داره اما من نمیدونم کدومه اینجا دیگه خیلی ترسناک شده برام [FACE_WITH_TEARS_OF_JOY]	0	0	3	0	3	irrelevant
صبح زود با یه کابوس وحشتناک از خواب پریدم بارونِ ریز داشت می زد به پنجره. این مرد توی گوشم گفت: نترس، وقتی صدای بارون میاد انگار خدا داره از اسمون زمزمه می کنه "من کنارت هستم"	2	1	0	1	0	relevant
قبل از اینکه همسرم کار ویزاش انجام بشه تنها زندگی میکردم یه سری که تو حموم بودم صدای مادرم رو از بیرون شنیدم که دو بار صدام کرد در صورتی که مادرم ایران زندگی میکنه از ترس پریدم بیرون که کسی وارد خونه نشده باشه ولی اینکه شما وارد خونه نشدید ببینید برام موضوع رو غیرقابل باور میکنه	2	1	2	1	2	relevant
من چرا فشاری شدم اون شوهر داره [CLOWN_FACE] من تو عمرم رو پسرا حتی کراشمم نزدم الان شوهر میخوام[CLOWN_FACE]	1	1	2	0	3	irrelevant
ببین فرض کن با طرف ازدواج کردی بعد یکی بیاد بگه هه من زنتو کردم قبلا یه خورده سنگینه [FACE_WITH_TEARS_OF_JOY]	2	1	1	1	1	relevant
در سال جدید برای تولد هر صغری و کبری ای ویولن نمی زنم.	0	0	3	0	3	irrelevant
روابط تو خانواده همسرم شکر ابه، خانواده منم یا ایران نیستن یا روابط خاصی نداریم	2	1	1	1	1	relevant
بیا مادرجنده این خانم/مادر همسر معاون وقت وزارت اطلاعات ج.ا. که توسط یک تیم دیگه وزارت اطلاعات بعد از قتل همسرش بازجویی میشه. میدونی چرا رفیقات دارن اینجوری شکنجه ش میکنن؟ چون خامنه ای گفته بود قتلهای زنحیره ای کار اسراییله و اینا داشتن ازش اعتراف میگرفتن که مامور اسراییله!	0	0	3	0	3	irrelevant
خب من الان فهمیدم کلا معنی رفاقت رو نفهمیدم تا الان، شاید هم رفاقت های جدید مدلش زن و شوهری شده [NEUTRAL_FACE]	0	1	1	0	3	relevant
دختره هم همینطور وگیرکرده بین پسره وباباننش که گفتند یاما یاعشقت وجدیم گفتن بهش واونم توانایی حذف نه اونوری نه عشقش روداره وپسره میگفت سامی خدایساله نمیشنوه زارزدنای شبامو افسردگیمو سکته کردم فردای روزیکه اومدم خونه دیدم نیست زنم ودیگه بغلش نکردم تا الان ودلم میره براش [FROWNING_FACE_WITH_OPEN_MOUTH][FROWNING_FACE_WITH_OPEN_MOUTH][FROWNING_FACE_WITH_OPEN_MOUTH]	0	1	1	0	3	relevant
به قول همسر سابقش گوگوش مثل یه چاه نفته و سرشار از استعداد حتی بعد از گذشت سالها- ایراد از ماست که در طول تاریخ عرب و مغول و غیره اینقدر به ما تجاوز کردن که ما ایرانیا نا خالصی زیاد داریم ، پر از عقده و کینه حتی بهترین ها و اصیل ترین های خودمون رو پایین میاریم.	0	0	3	0	3	irrelevant
ناهار خونه مادر شوهرم بودیم، من و همسر یه چرت کوچیک زدیم بیدار شدیم دیدیم همه با هم نیستن(به جز مادر شوهرم)گفت رفتن عید دیدنی و دوباره بر میگردن تا یه ساعت دیگه انقدر ناراحت شدم به شوهرم گفتم منم که ادم نبودم! شوهر در حمایت از من از مادرش خدافظی کرد و اومدیم خونه [UNAMUSED_FACE]	2	1	0	1	0	relevant
من میخرم برات بیا زن من شو مریم جون	1	1	2	0	3	irrelevant
اون مال6سال پیش بود اون موقع رل و پارتنر نبود زید بازی میکردیم [FACE_WITH_TEARS_OF_JOY][FACE_WITH_TEARS_OF_JOY][FACE_WITH_TEARS_OF_JOY][FACE_WITH_TEARS_OF_JOY]	1	0	3	0	3	irrelevant
جدا چرا همتون با این رقص اینجوری شدین؟ [FACE_WITH_TEARS_OF_JOY][FACE_WITH_TEARS_OF_JOY] چرا فک میکنین زنتون بیس چاری قراره برقصه؟[FACE_WITH_TEARS_OF_JOY] خب شما نیاز به یه رقاص کاباره دارید نه زن[FACE_WITH_TEARS_OF_JOY][FACE_WITH_TEARS_OF_JOY][FACE_WITH_TEARS_OF_JOY]	0	1	1	0	3	relevant
[FACE_WITH_TEARS_OF_JOY][FACE_WITH_TEARS_OF_JOY][FACE_WITH_TEARS_OF_JOY]شما یکی از لباسها را تو تن پارتنر خودت تصور کن [FACE_WITH_TEARS_OF_JOY][GRINNING_FACE_WITH_SWEAT]	0	1	0	0	3	relevant
فقط سرویس جنسی رو شما از زندگی مشترک در نظر دارید؟ من شاهد صورت کبود خانمی بودم،شاهد دچار شدن خانم دیگری به بدترین بیماری های مقاربتی بخاطر هوسرانی شوهرش،دیدم زنی بخاطر بچه هاش از صبح تاشب کار میکنه تا خرج خودشو دربیاره چون شوهرش بهش پول نمیده ولی زندگیشو حفظ کرده، زنی رو دیدم	0	1	1	0	3	relevant
فکت خانواده ام کاملا بی اهمیت و ازاردهنده اند هیچ دوستی ندارم برا همبازیام تو باشگاه و همکارام سر کار جوکم برا همسرم نامریی ام من تو این دنیا فقط خودمم	1	1	1	0	3	irrelevant
واقعا تناقض زیاده،توی قران گفته شده زنت به حرفت گوش نداد بزنش!	0	1	1	0	3	relevant
چی؟ برای سفر بعدی محتاط خواهی بود؟؟؟ وات فاک. تو یک بار دیگه برو ایران، من خودم شخصن یک کمپین می زنم که بخاطر خنگ بودن و جاکش بودنت، مادام العمر نگهت دارن.	0	0	3	0	3	irrelevant
حاجی،ط برو پیش همون سوشی خورا زندگی کن…اینجا جهان سومه ما املت میزنیم و مایلیم تا ازدواج باکره بمونیم…انگِ پارتنر بدی بودن نزن [PINCHED_FINGERS_LIGHT_SKIN_TONE]	0	1	1	0	3	relevant
: وقتی یه صبح تا غروب تلگرام سر نمی زنم:	0	0	3	0	3	irrelevant
ده سال دیگه ازدواج میکنم زنم 25 سالش میشع	1	1	2	0	3	irrelevant
من هیچ بایوگرافی ازت ندارم ولی فکر می کنم یعنی حدس می زنم باید هم دانشکده ای باشیم [FACE_WITH_MONOCLE] نمد بیا بگووو[FACE_WITH_TEARS_OF_JOY]	0	0	3	0	3	irrelevant
اون اصلا نمیشه درک کرد یعنی سخت زن شوهر همدیگرو درک کنن	0	1	1	0	3	relevant
یه بهونه جدیدتر اگه مهمونی خونه اقوام خودتون هستید بگید که باید برید یه سر خونه اقوام همسرتون و زشته و اینا.	2	1	2	1	2	relevant
کمتر کسشر بگید شاید پارتنر تو کمتر خروسی بوده کع اگرم بود تاخیری استفاده میکرد	0	0	3	0	3	irrelevant
طبق منطق کسشراگه با طرف ازدواج کردی بعد یکی بیاد بگه« هه من به شوهرت دادن قبلا» هم باید سنگین باشه،هست؟؟	0	1	1	0	3	relevant
جالب اینه که همین بحث چندشب پیش بین دوستام هم مطرح شد و تهش فکر کردن من سنگ چیزی رو به سینه می زنم و اگر من رو سال ها نمی شناختن حتماً برچسبی به پیشونیم می زدن و شاید تو چشمشون جور دیگه ای به نظر می رسیدم ولی فکر می کنم همیشه همون اول موضعم رو مشخص کردم که -من طرفی ندارم-	0	0	3	0	3	irrelevant
مردک بی مایه زر میزنه ، این چه استدلالی ست ، اگه مادرت ، زنت ، دخترت ، پسرت جلوی چشمت مورد تعرض جنسی باشه میگی من پلیس نیستم قاضی نیستم حکم بدم یا تجاوزگر رو در دم میکشی ، خاک بر سر بی بوته تون پاینده ایران خلیج فارس	0	1	1	0	3	relevant
طبق منطق کسشرت اگه با طرف ازدواج کردی بعد یکی بیاد بگه« هه من به شوهرت دادن قبلا» هم باید سنگین باشه،هست؟؟	2	1	1	1	1	relevant
ممد اگه ازت پرسیدن چیکار میکنی یا بگو زنت یا دخترت یا پسرت اگه البته فامیل خیلی نزدیک نبود [GRINNING_FACE_WITH_SWEAT][GRINNING_FACE_WITH_SWEAT][GRINNING_FACE_WITH_SWEAT][GRINNING_FACE_WITH_SWEAT]	0	0	3	0	3	irrelevant
کی؟ معلومه هرکس که چیزی به من یاد بده. زنم نمیخوام.	1	1	2	0	3	irrelevant
شهبانو دنبال جاه و مقام نبود ولی کدام زن یارای ان را داشت که دست رد به سینه اعلی حضرت شاهنشاه اریامهر بزند! با این حال تردیدی نیست که دیدگاه های علیاحضرت چپگرایانه بود چنانچه همسر شاهزاده هم چپول تشریف دارند ولی دخترانش اصولا بعید می دانم دارای مشی سیاسی باشند.	0	0	3	0	3	irrelevant
بسیار بسیار برنامه جالبی بود توانایی اجراتون عالی بود اما این برنامه یه لول بالاتر از همیشه منکه بسیار لذت بردم و با خانمم خیلی به کل کل هایی که داشتین خندیدیم	0	0	3	0	3	irrelevant
قراره برات پیرسینگ هم بزنم بیبی [WINKING_FACE] میتونیم کلاس رو بعد از اون برگزار کنیم	0	0	3	0	3	irrelevant
ولی اگر خوب شوهر کنی نصف راه رفتی [FACE_WITH_TEARS_OF_JOY]	0	1	0	0	3	irrelevant
تو این 6 ماه شوهر پیدا کردی ؟خدا بده برکت	0	1	2	0	3	irrelevant
و منی که حتی یکبار هم از جانب همسرم 'زیبا ' خطاب نشدم…	2	1	1	1	1	relevant
او نیستم اما امسال میخواهم اورا داشته باشم. زنم رو بدید.	1	1	2	0	3	irrelevant
کسایی رو که واسه پارتنرشون خونه نمی خرن مسخره کنی و هزینه اجتماعی درست کنی و خونه خریدن واسه پارتنر رو طبیعی جلوه بدی. هیچ عیبی هم درش نیست. حال به هم زن هم نیست بلکه قانون طبیعته. سبک های زندگی مثل گونه های جانوری در تنازع بقا هستند و/17	0	1	1	0	3	relevant
خیلی [FACE_WITH_TEARS_OF_JOY][FACE_WITH_TEARS_OF_JOY][OK_HAND] اگه یه روز دلت متاهلی خواست اول بیا پیشم	2	1	1	1	1	relevant
گفتم دختر خوب شوهر میکنه گفتم اونی که مجرده مشکل داره؟	0	1	1	0	3	irrelevant
: والا منم بلدم برقصم. ولی فقط برای شوهرم ک ذوقمو بکنه نه واسه شما ها ک عیب بذارید روم.	2	1	0	1	0	relevant
رفیق دختر ؟همسر اینده بگو دیگه	1	1	2	0	3	irrelevant
اتفاقا منو همسرم تو همین شرایط بودیم من سنی و ایشون شیعه و خانواده مذهبی داره،بعد کلی صبر جور شد ،و بعد از ازدواج خداروشکر مشکلی پیش نیومد [GRINNING_FACE_WITH_BIG_EYES]	2	1	0	1	0	relevant
خودم بفرستم که شوهر در نمیاد ازش [PENSIVE_FACE][FACE_WITH_TEARS_OF_JOY]	1	1	2	0	3	irrelevant
کردپا سرکوب حکومتی در کردستان 457 مورد بازداشت در سال 1400 بازنمودی کلی؛ 25 زن… 4تن زیر 18 سال… ممانعت از دسترسی به وکیل و ملاقات در دوران بازداشت… بازداشت اعم افراد بدون ابلاغ حکم… اهداف امنیتی در بازداشتهای کردستان…	0	0	3	0	3	irrelevant
یا که یه پسر اسپزی می کنه هوس شوهر	1	1	0	0	3	irrelevant
به همسر بگو	2	1	2	0	2	relevant
واقعا چقدر زن و دختر زیبا در تایم لاین زیاده، بزنم به تخته.	0	0	3	0	3	irrelevant
شوهر چیه ، یه دوست صمیمی خیلی بهتراز شوهره	2	1	1	1	1	relevant
اگه زنم بعد ازدواج اینجوری ابرو کنه چیکار کنمممم [PERSON_FACEPALMING_LIGHT_SKIN_TONE][PERSON_FACEPALMING_LIGHT_SKIN_TONE][PERSON_FACEPALMING_LIGHT_SKIN_TONE][PERSON_FACEPALMING_LIGHT_SKIN_TONE][PERSON_FACEPALMING_LIGHT_SKIN_TONE]	1	1	1	0	3	irrelevant
مجریه خیلی جدی و با لبخند پرسید: «اولین چیزی که با همسرتون می خواید انجام بدید چی هست؟» از تو می پرسند	0	1	2	0	3	relevant
طبیعیه که من وقتی مامان دوستِ پسرم و میبینم ازین لبخند ( [: ) میزنم و همش سعی میکنم که قابل تحمل باشم؟ و بعد مامانش منو نگاه میکنه و فکر میکنه کصخل کردم .	2	1	2	1	2	relevant
براساس تجربه ای که تویی nftهای لونا داشتم الان مینت کردن این ریسکش خیلی بالاست دلیلش هم مشخصه-استقبال نشدن/ درسته یکی دوتا پارتنر خوب داره اما این دلیل قانع کننده ای برام نبود-نتونستم اطلاعاتی از تیمشون پیدا کنم هویت نامشخص بود	0	0	3	0	3	irrelevant
کلمه زن رو پاک کن بذار همسر بذار مدیر برنامه بذار هرکوفتی نقدو ول کردی نسیه رو میگیری؟	0	0	3	0	3	irrelevant
[truncated: 11,240 more rows]
